# Supplementary material
Source: PubMed Central journal article supplement (PMC2847618)
Supplement: NIHMS28740-supplement-1.pdf [file NIHMS28740-supplement-1.pdf]

## **SUPPLEMENTARY INFORMATION**

### **Multiple common variants for celiac disease influencing immune gene expression**

Patrick CA Dubois, Gosia Trynka, Lude Franke, Karen A Hunt, Jihane Romanos, Alessandra Curtotti, Alexandra Zhernakova, Graham AR Heap, Róza Ádány, Arpo Aromaa, Maria Teresa Bardella, Leonard H van den Berg, Nicholas A Bockett, Emilio G. de la Concha, Bárbara Dema, Rudolf SN Fehrmann, Miguel Fernández-Arquero, Szilvia Fialat, Elvira Grandone, Peter M Green, Harry JM Groen, Rhian Gwilliam, Roderick HJ Houwen, Sarah E Hunt, Katri Kaukinen, Dermot Kelleher, Ilma Korponay-Szabo, Kalle Kurppa, Pádraic MacMathuna, Markku Mäki, Maria Cristina Mazzilli, Owen T McCann, M Luisa Mearin, Charles A Mein, Muddassar M Mirza, Vanisha Mistry, Barbara Mora, Katherine I Morley, Chris J Mulder, Joseph A Murray, Concepción Núñez, Elvira Oosterom, Roel A Ophoff, Isabel Polanco, Leena Peltonen, Mathieu Platteel, Anna Rybak, Veikko Salomaa, Joachim J Schweizer, Maria Pia Sperandeo, Greetje J Tack, Graham Turner, Wieke HM Verbeek, Rinse K Weersma, Victorien M Wolters, Elena Urcelay, Bozena Cukrowska, Luigi Greco, Susan L. Neuhausen, Ross McManus, Donatella Barisani, Panos Deloukas, Jeffrey C Barrett, Paivi Saavalainen, Cisca Wijmenga, David A van Heel

#### **Contents:**

Page 2 - 3 : **Supplementary Note** Detailed description of case and control subjects; genotype calling; expression probe re-mapping.

Page 3: **References for Supplementary Information**

Page 4: **Supplementary Table 1** Subjects used in eQTL mapping analysis.

Page 5: **Supplementary Table 2** Conditional logistic regression to test for multiple independent associations.

Pages 6,7: **Supplementary Table 3** Details of Illumina expression probes corresponding to Table 3 findings.

Pages 8-15: **Supplementary Figure 1** LD structure, genes and association results for 39 non-HLA coeliac disease associated regions.

Pages 16-21: **Supplementary Figure 2** Detailed eQTL genotype - expression correlation analyses.

Pages 22-42: **Supplementary Figure 3** Co-localisation of case/control association and genotype-expression correlation (eQTL) signals.

## Supplementary Note

Detailed description of case and control subjects:

GWAS: UK(1) celiac cases were previously described<sup>1</sup>, with removal of additional individuals showing genetic relatedness to UK(2) individuals, and were matched to 1958 Birth Cohort population controls genotyped by the Type 1 Diabetes Genetics Consortium<sup>2</sup>. Details of Dutch and Italian cohorts were previously described<sup>3,4</sup>. UK(2) celiac cases were partly previously described<sup>5</sup>, with additional individuals recruited through Celiac UK membership. UK(2) controls comprised 2434 population controls from the 1958 Birth Cohort and 2502 National Service population controls. Finnish affected individuals (sporadic cases, or unrelateds from affected families across Finland) were partly previously described<sup>6</sup>. Finnish population controls comprised 904 samples from Finrisk (Corogene, excluding coronary heart disease) and 925 samples from Health 2000 (excluding metabolic syndrome and positive celiac disease serology).

Follow-up: USA comprised 525 celiac cases and 340 controls from the Mayo Clinic (Minnesota), and 448 celiac cases and 215 controls from the University of California Irvine<sup>7</sup>. Polish celiac cases were diagnosed in hospital clinics, and controls from donors at the Children's Memorial Health Institute (Warsaw), excluding celiac serology positive samples. Italian samples comprised 377 celiac cases and 94 controls from Rome, and 637 celiac cases and 711 celiac serology negative controls from Naples<sup>8</sup>. Irish celiac cases and controls were as described, with additional samples<sup>9</sup>. 259 Finnish celiac cases were recruited similarly to GWAS samples, and controls were an additional 653 population controls from the Finrisk study. 965 Hungarian celiac cases were collected from Budapest and Debrecen children clinic, and 1067 controls representative of the Hungarian population were selected from an epidemiological study. Part of the Hungarian cohorts have been described earlier<sup>6</sup>. Spanish celiac cases were recruited in Madrid hospitals, controls were donors and hospital employees<sup>10</sup>.

Detailed description of genotype calling:

To minimize calling biases arising from batch effects and the use of different genotyping platforms, we attempted to call cases and controls together from the same collections if possible, and maximized samples size to reduce problems when clustering rare variants. Genotypes were called separately in the following five pools from normalized R, theta data: pool A (n=2199: 778 UK1 cases together with 1421 1958 birth cohort controls genotyped on the Illumina Hap550v1-1 platform as described in our previous study<sup>1</sup>. Genotype data from the 1421 controls was then discarded and UK1 case data subsequently merged with UK1 controls for analysis. UK1 controls were called separately in pool B (2596 1958 birth cohort individuals genotyped for the Type 1 Diabetes Genetics Consortium on the Illumina Hap550-2v3 platform)<sup>2</sup>. Separate calling of UK1 case and UK1 control individuals was required due to differences in genotype cluster intensity characteristics observed for UK1 case data (Hap300v1-1) and controls (Hap550-2v3). Pool C comprised UK3 cases and controls (n=6963, 1894 cases on Human 670-QuadCustom\_v1 and 5069 controls on 1.2M-DuoCustom\_v1). Pool D comprised Dutch and Italian cases and controls (n=2917 on 670-QuadCustom\_v1). Pool E comprised Health2000 and Finrisk cohorts and Finnish cases (n=6760, 674 cases on Human 670-QuadCustom\_v1, 912 Finrisk

controls, 927 Health2000 controls, 4247 additional Finrisk and H2000 cases and internal controls- Human 610-Quad). The 4247 additional samples were then discarded.

Detailed description of expression probe re-mapping:

We used Ensembl52 to obtain, for each annotated gene, the transcript with the largest number of exons and included this main spliced transcript in our reference set. Second, we added one sequence per intron, extending intron boundaries 40 bp on each side to allow mapping of the 50 bp probe sequences, overlapping exon-intron junctions. Last, a version of the reference DNA genome with masked annotated transcripts was included. Probe sequences were mapped versus the composite reference using novoalign v2.05.12 ([www.novocraft.com](http://www.novocraft.com)) permitting alignment against all possible sequences originating from the same transcript (parameters -t 150 -v 20 20 200 [>]([^\\_]\*\_)). For each probe we determined whether it mapped uniquely to one particular genomic locus, or, if multiple hits were present (e.g. across exons) that these resided < 250kb from the probe.

#### References for Supplementary Information

1. van Heel, D.A. et al. A genome-wide association study for celiac disease identifies risk variants in the region harboring IL2 and IL21. *Nat Genet* **39**, 827-9 (2007).
2. Barrett, J.C. et al. Genome-wide association study and meta-analysis find that over 40 loci affect risk of type 1 diabetes. *Nat Genet* (2009).
3. Coenen, M.J. et al. Common and different genetic background for rheumatoid arthritis and coeliac disease. *Hum Mol Genet* (2009).
4. Romanos, J. et al. Six new coeliac disease loci replicated in an Italian population confirm association with coeliac disease. *J Med Genet* **46**, 60-3 (2009).
5. Hunt, K.A. et al. Newly identified genetic risk variants for celiac disease related to the immune response. *Nat Genet* **40**, 395-402 (2008).
6. Koskinen, L.L. et al. Fine mapping of the CELIAC2 locus on chromosome 5q31-q33 in the Finnish and Hungarian populations. *Tissue Antigens* **74**, 408-16 (2009).
7. Garner, C.P. et al. Replication of celiac disease UK genome-wide association study results in a US population. *Hum Mol Genet* **18**, 4219-25 (2009).
8. Megiorni, F. et al. HLA-DQ and susceptibility to celiac disease: evidence for gender differences and parent-of-origin effects. *Am J Gastroenterol* **103**, 997-1003 (2008).
9. Hunt, K.A. et al. Large scale replication of a genome-wide association study in celiac disease. *American Society of Human Genetics Meeting*, platform talk 26 (2007).
10. Dema, B. et al. Association of IL18RAP and CCR3 with coeliac disease in the Spanish population. *J Med Genet* **46**, 617-9 (2009).

**Supplementary Table 1** Subjects used in eQTL mapping analysis.

Numbers are shown after quality control steps.

| <b>Case/Control</b>                   | <b>Population</b> | <b>Number of individuals</b> | <b>Genotype platform</b> | <b>Expression platform</b> |
|---------------------------------------|-------------------|------------------------------|--------------------------|----------------------------|
| Controls                              | Dutch             | 324                          | Hap370                   | HT-12                      |
| Amyotrophic Lateral Sclerosis         | Dutch             | 414                          | Hap370                   | HT-12                      |
| Ulcerative Colitis                    | Dutch             | 49                           | 610-Quad                 | HT-12                      |
| Chronic Obstructive Pulmonary Disease | Dutch             | 453                          | 610-Quad                 | HT-12                      |
| Celiac disease                        | UK                | 111                          | Hap300                   | Ref-8 v2                   |
| Amyotrophic Lateral Sclerosis         | Dutch             | 59                           | Hap300                   | Ref-8 v2                   |
| Controls                              | Dutch             | 59                           | Hap300                   | Ref-8 v2                   |

**Supplementary Table 2** Conditional logistic regression to test for multiple independent associations.

| Locus                                                                                                                                        | Chr | Position<br>(bp, B36) | LD block<br>(Mb) | SNP        | Pairwise<br>SNP <sup>a</sup> r <sup>2</sup> | Pairwise<br>SNP <sup>a</sup> D' | P <sub>combined</sub><br>(CMH<br>analysis) | P <sub>combined</sub> <sup>b</sup><br>(logistic<br>regression) | P <sub>combined</sub> conditioned<br>on alternate SNP <sup>c</sup><br>(logistic regression) |
|----------------------------------------------------------------------------------------------------------------------------------------------|-----|-----------------------|------------------|------------|---------------------------------------------|---------------------------------|--------------------------------------------|----------------------------------------------------------------|---------------------------------------------------------------------------------------------|
| <b>Residual evidence of multiple independent SNPs at a locus (p&lt;10<sup>-3</sup>, both before and after conditioning on alternate SNP)</b> |     |                       |                  |            |                                             |                                 |                                            |                                                                |                                                                                             |
| <i>REL</i>                                                                                                                                   | 2   | 60972975              | 60.78-61.74      | rs842647   | 0.247                                       | 0.906                           | 2.88x10 <sup>-8</sup>                      | 2.40x10 <sup>-12</sup>                                         | 6.82 x10 <sup>-4</sup>                                                                      |
|                                                                                                                                              |     | 61040333              |                  | rs13003464 |                                             |                                 | 3.71x10 <sup>-13</sup>                     | 1.03x10 <sup>-16</sup>                                         | 3.00x10 <sup>-8</sup>                                                                       |
| CCR1/CCR3                                                                                                                                    | 3   | 46210205              | 45.90-46.57      | rs13098911 | 0.135                                       | 0.781                           | 3.26x10 <sup>-17</sup>                     | 1.49x10 <sup>-16</sup>                                         | 7.77 x10 <sup>-8</sup>                                                                      |
|                                                                                                                                              |     | 46327388              |                  | rs6441961  |                                             |                                 | 2.93x10 <sup>-15</sup>                     | 3.87x10 <sup>-18</sup>                                         | 1.39x10 <sup>-9</sup>                                                                       |
| <i>IL12A<sup>d</sup></i>                                                                                                                     | 3   | 161147744             | 161.07-161.23    | rs17810546 | 0.160                                       | 0.957                           | 4.56x10 <sup>-18</sup>                     | 2.34x10 <sup>-15</sup>                                         | 5.66 x10 <sup>-9</sup>                                                                      |
|                                                                                                                                              |     | 161179692             |                  | rs9811792  |                                             |                                 | 1.03x10 <sup>-11</sup>                     | 1.66x10 <sup>-10</sup>                                         | 2.83x10 <sup>-4</sup>                                                                       |
| <i>IRF4</i>                                                                                                                                  | 6   | 328546                | 0.32-0.40        | rs1033180  | 0.079                                       | 0.880                           | 5.58x10 <sup>-08</sup>                     | 1.60x10 <sup>-8</sup>                                          | 1.02x10 <sup>-4</sup>                                                                       |
|                                                                                                                                              |     | 356064                |                  | rs872071   |                                             |                                 | 8.22x10 <sup>-07</sup>                     | 9.12x10 <sup>-13</sup>                                         | 4.26x10 <sup>-9</sup>                                                                       |
| <i>THEMIS /<br/>PTPRK</i>                                                                                                                    | 6   | 128320491             | 127.99-128.32    | rs802734   | 0.077                                       | 0.993                           | 2.62x10 <sup>-14</sup>                     | 2.43x10 <sup>-12</sup>                                         | 9.00x10 <sup>-8</sup>                                                                       |
|                                                                                                                                              |     | 128337195             |                  | rs7738609  |                                             |                                 | 2.88x10 <sup>-10</sup>                     | 1.63x10 <sup>-12</sup>                                         | 4.07x10 <sup>-8</sup>                                                                       |
| <i>ETSI</i>                                                                                                                                  | 11  | 127886184             | 127.84-127.89    | rs11221332 | 0.196                                       | 0.934                           | 5.28x10 <sup>-16</sup>                     | 2.04x10 <sup>-16</sup>                                         | 4.98x10 <sup>-9</sup>                                                                       |
|                                                                                                                                              |     | 127926136             |                  | rs4245079  |                                             |                                 | 5.34x10 <sup>-10</sup>                     | 2.46x10 <sup>-11</sup>                                         | 6.83x10 <sup>-4</sup>                                                                       |

<sup>a</sup>pairwise LD estimated for 6785 individuals from UK 2 GWAS

<sup>b</sup>logistic regression performed with sample collections as binary dummy covariates

<sup>c</sup>logistic regression performed as for b, conditioned on alternate SNP at locus

<sup>d</sup>no follow-up data for rs9811792, all SNP analyses confined to GWAS collections

**Supplementary Table 3** Details of Illumina expression probes corresponding to Table 3 findings.

| Unique Identifier         | HGNC Name     | Platform          | ILMN Code    | Array Address ID | Probe Sequence                                      |
|---------------------------|---------------|-------------------|--------------|------------------|-----------------------------------------------------|
| 650452                    | PLCH2         | HumanHT12         | ILMN_2061565 | 650452           | CTTCGAGGCTGGCCCTGCCAGGCAGTTTTCCCGCGTTTTAGGATCTGTA   |
| 6520725                   | TNFRSF14      | HumanHT12         | ILMN_1697409 | 6520725          | AGCCAAGGCTGGACTGGGTTGGCTGCAGTGTGGTGTAGTGGATAACCAC   |
| 2070246                   | MMEL1         | HumanHT12         | ILMN_1718488 | 2070246          | TTCTTCATCAACTATGCCAGGTGTGGTGCGGGTCTACCGGCCCGAGTT    |
| Human_RefSeq-8_v2-6250338 | C1orf93       | Human_RefSeq-8_v2 | ILMN_12752   | 6250338          | GTGGGTGGGTGTGACAGCAGGAGCATTGCCATCTTGGACAAACATGGCCA  |
| 610193                    | PARK7         | HumanHT12         | ILMN_1744713 | 610193           | AATTGTTGAAGCCCTGAATGGCAAGGAGGTGGCGGCTCAAGTGAAGGCTC  |
| 6290400                   | CD247         | HumanHT12         | ILMN_1676924 | 6290400          | AAACCCGTCAATGTACTAGGATACTGCTGCGTCATTACAGGGCACAGGCC  |
| 3890689                   | CD247         | HumanHT12         | ILMN_2377669 | 3890689          | ACTGTGCGTCATTACAGGGCACAGGCCATGGATGGAAAACGCTCTCTGC   |
| 1300279                   | DDX59         | HumanHT12         | ILMN_1748077 | 1300279          | CTGGGATATTGCAAAACGAGTAAAGCCCACAGGATCCATTCTCCCCCTC   |
| 1170220                   | AHSA2         | HumanHT12         | ILMN_1798308 | 1170220          | GGGAAC TGCCAGAAGAACACTATGCCATGGTTGCACTGAATTTGTGCC   |
| 4810020                   | PLEK          | HumanHT12         | ILMN_1795762 | 4810020          | GCCCTCCCTCAATTCCTGTAAACATTCCTGAAGCTGTTCCCACTCCAG    |
| 6520180                   | IL18RAP       | HumanHT12         | ILMN_1721762 | 6520180          | GGGTACTTTAGTACACAACCCCCTAAGATTTCCAGTGGTCCGAGCAG     |
| 1780433                   | UBE2E3        | HumanHT12         | ILMN_1733142 | 1780433          | GGGTGTCCTTGTCTCTCCTAGTACCACCTGTGCAACAGCGAAAGTTT     |
| 6550333                   | CXCR6         | HumanHT12         | ILMN_1674640 | 6550333          | TGCTGGCACCACCAGGCACCTCACAGAAATGAGATCAGGCTCTGCCTCAC  |
| 2190671                   | CCR3          | HumanHT12         | ILMN_1763322 | 2190671          | GCCTTCCACTCACCTCTAAAACAGTCCCTTCAAACCTCCAGTGCAACAC   |
| Human_RefSeq-8_v2-7570670 | CCR3          | Human_RefSeq-8_v2 | ILMN_2506    | 7570670          | CCATCCACAGCAGAGCCGGAACCTCTCTATTGTGTTTTAGGTCAGATGCAG |
| 3850161                   | KTELC1        | HumanHT12         | ILMN_1774800 | 3850161          | TGATGGCTTCATGATCCAGCACAGTGCCTCACACAAAGAACTATTGGGTG  |
| 6550288                   | KTELC1        | HumanHT12         | ILMN_1811104 | 6550288          | GGATTTCAAGTTCCCTTTTTGTGCCTTCATGCCCTACTTCTTAATGCCTC  |
| 3520349                   | BACH2         | HumanHT12         | ILMN_1777792 | 3520349          | AGCTGTCTGCTTCAGAAAAGTGAGGGCTCCAGGAATGAGGAGAATCTTCAA |
| 4860242                   | TAGAP         | HumanHT12         | ILMN_1676408 | 4860242          | ATAAGCTCCCCCGGCCAACCTCCTGCTACTCAAGCACTTGGTCTATGTG   |
| 5890739                   | TAGAP         | HumanHT12         | ILMN_1739985 | 5890739          | ATGAGAAATCCCCAACTATGATCTCACCATCTGTTTGCCAAGTCCAGGC   |
| 5360364                   | TAGAP         | HumanHT12         | ILMN_2333774 | 5360364          | TGGCCATCTGCATTGGACCCAACATGCTCACCTGGAGAATGACCAGAGC   |
| 2750154                   | ELMO1         | HumanHT12         | ILMN_1784320 | 2750154          | AGCGTTTGGTGTACCTTCTCCTGGGAGGTCCTGCTGCAACTCAAGTTCC   |
| 2450131                   | ZMIZ1         | HumanHT12         | ILMN_1771627 | 2450131          | CGTACACACATAAACACACCACCAGTGCAGCCTGAAGTAACTCCACAG    |
| 6560301                   | SH2B3///ATXN2 | HumanHT12         | ILMN_1752046 | 6560301          | AAGGCCTTGGACTCTTCCCTGAGGGTTGCCTGAAATTCCTTCATGCTTTC  |
| Human_RefSeq-8_v2-3190129 | TMEM116       | Human_RefSeq-8_v2 | ILMN_23612   | 3190129          | CCACCAACTAAAGCAGGAGGCTCGGCGTGATGCAGATACCAGACACCAT   |
| 2070736                   | TMEM116       | HumanHT12         | ILMN_2052871 | 2070736          | GCAGGGGCTTAAATTCCTGGAATCCACCCTGACTTTTCTGCCAGTACT    |
| 840253                    | ALDH2         | HumanHT12         | ILMN_1793859 | 840253           | GCAAGCTTCTCCCTCAGCCATTGATGGAAAAGTTCAGCAAGATCAGCAAC  |
| 4540072                   | AC009121.6    | HumanHT12         | ILMN_1790537 | 4540072          | CGGCCCTGAAAGACAACAGCTCCCTTCTGCTTCGGACACCACTCAAAC    |

|                           |                                |                   |              |         |                                                     |
|---------------------------|--------------------------------|-------------------|--------------|---------|-----------------------------------------------------|
| 4070615                   | WNT3                           | HumanHT12         | ILMN_1803593 | 4070615 | ACGCGTGGTAAATGACCCAGACCCAACCTCGCCTGTGGACGGGGAGGCTCT |
| 3520672                   | ARL17///LRRC37A<br>///LRRC37A2 | HumanHT12         | ILMN_1783673 | 3520672 | AACAGCCCCACACACAGCAGGGGCCTGAGAAGTTAGCGGGAAACGCCGTC  |
| 4880037                   | LOC388397                      | HumanHT12         | ILMN_1678312 | 4880037 | CCCCACCTCCAAAAGGGCTGGGGACAGCAGGTGTATCCTTGTTAGTTC    |
| 5260138                   | NSF                            | HumanHT12         | ILMN_1680353 | 5260138 | CCTGTGATTCTGGTGGCCAGTATCCTGGATTCCTCTAAGATCTGCCTC    |
| 1410484                   | NSF                            | HumanHT12         | ILMN_1680687 | 1410484 | TCAGCACCACCATCCACGTGCCAACATTGCCACAGGAGAGCAGCTGTTG   |
| Human_RefSeq-8_v2-7200373 | RRP1///AP001053.1              | Human_RefSeq-8_v2 | ILMN_15485   | 7200373 | GTGGCGGGGAGACAGAGGGGCGATGGCCAGTTTCTTTGGGCTGAAAAT    |
| 1230242                   | UBE2L3                         | HumanHT12         | ILMN_1677877 | 1230242 | TTCACACCCGCCTGGTTTCTTGAAGTGTGCTGGGTCCTTCCCTCTGCTCC  |
| 6480360                   | TLR8                           | HumanHT12         | ILMN_1657892 | 6480360 | CAGTTGGTCATCAACTATTTCCCTTGACTGCTGCTGGGATGGCCTGC     |
| 3390612                   | TLR8                           | HumanHT12         | ILMN_1705047 | 3390612 | GCTCCATCCTCCAGTGGCCTGACAACCCGAAGGCAGAAGGCTGTTTTGG   |

**Supplementary Figure 1** LD structure, genes and association results for 39 non-HLA coeliac disease associated regions.

Chromosomal positions based on NCBI Build 36 co-ordinates.  $P_{\text{GWAS}}$  values (left Y axis and black points) are from 4,533 cases and 10,750 controls.  $P_{\text{combined}}$  values (left Y axis and red points) are from 9,451 cases and 16,434 controls. Recombination rate (HapMap) shown in blue (right Y axis). The green bar indicates the narrow linkage disequilibrium block as reported in **Table 2**, the complete X axis shows an additional 0.05% of base positions for clarity. All genes with HUGO identifiers are displayed (as annotated in Ensembl v54), for multiple transcripts only the largest is shown.



Chromosome 1

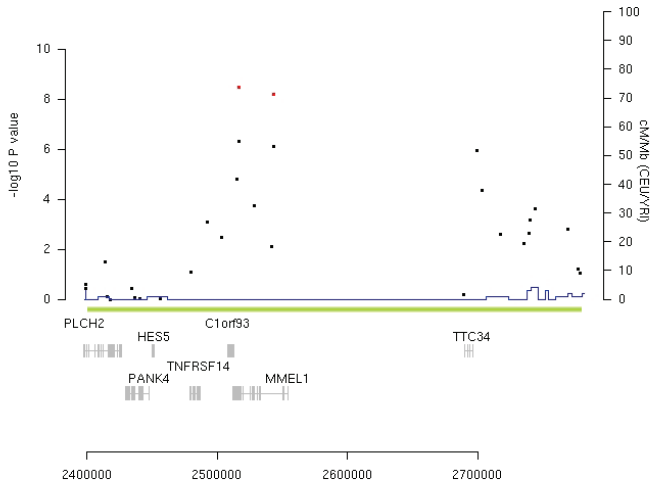

Chromosome 1

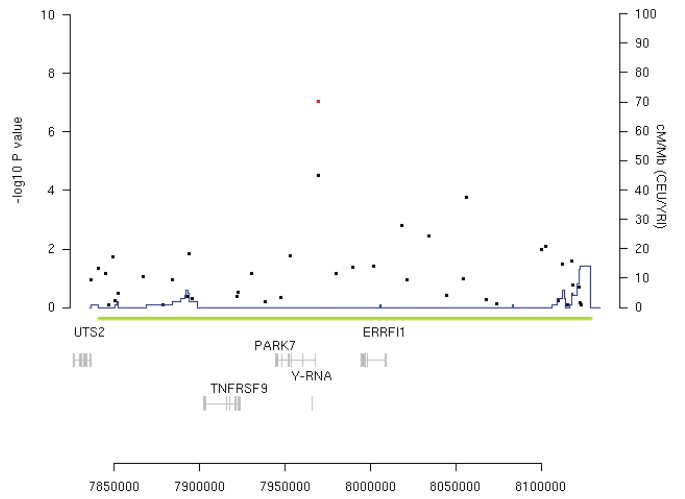

Chromosome 1

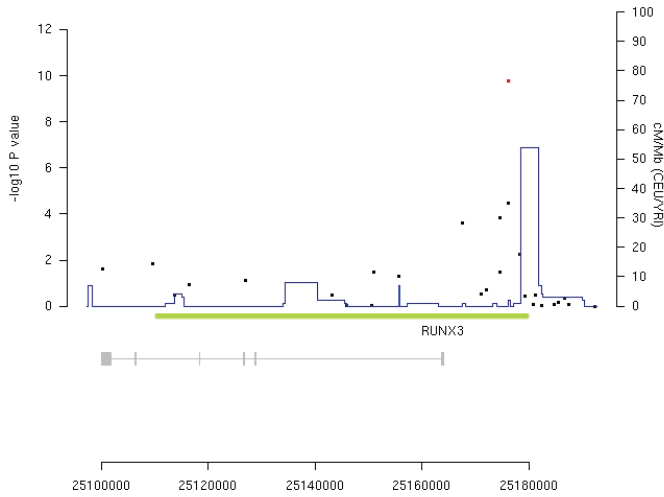

Chromosome 1

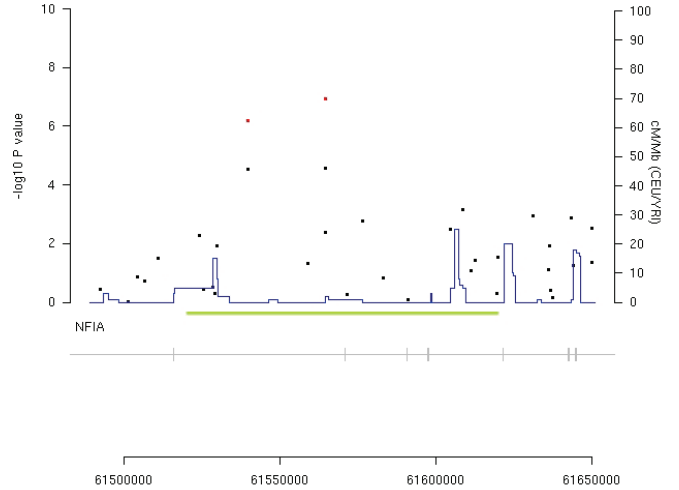

Chromosome 1

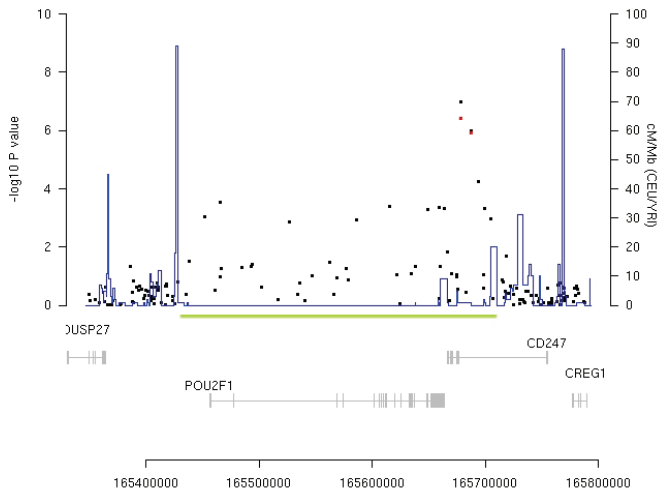

Chromosome 1

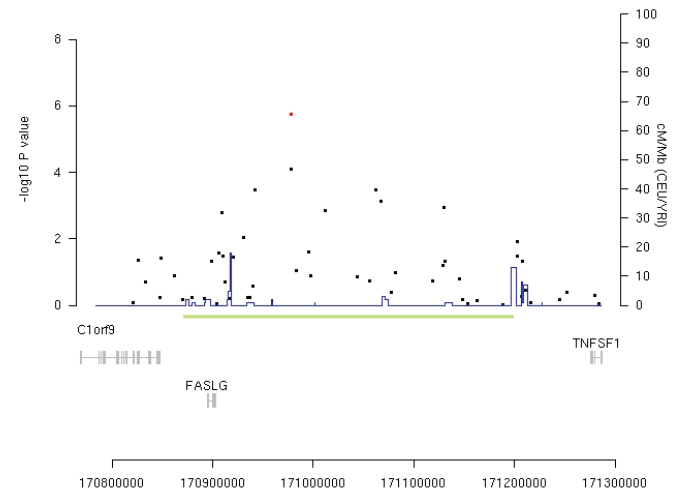

Chromosome 1

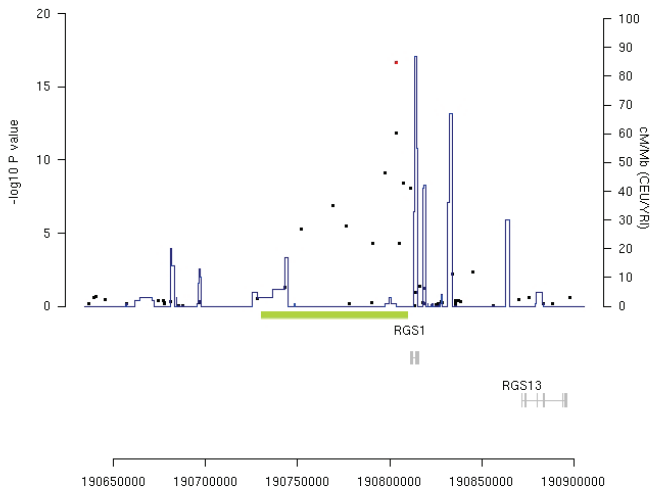

Chromosome 1

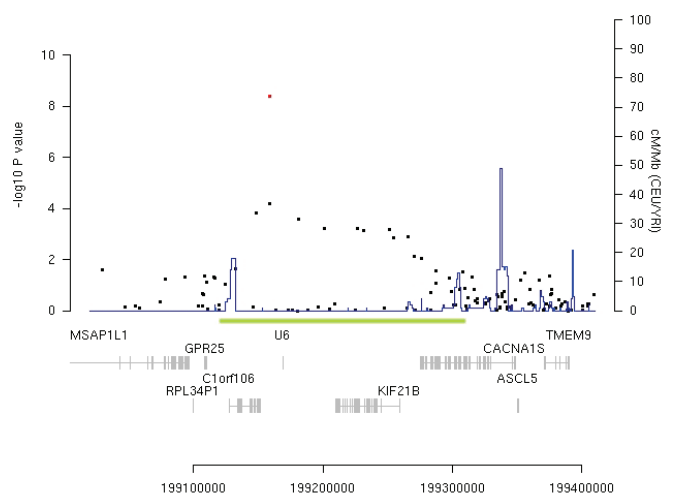

Chromosome 2

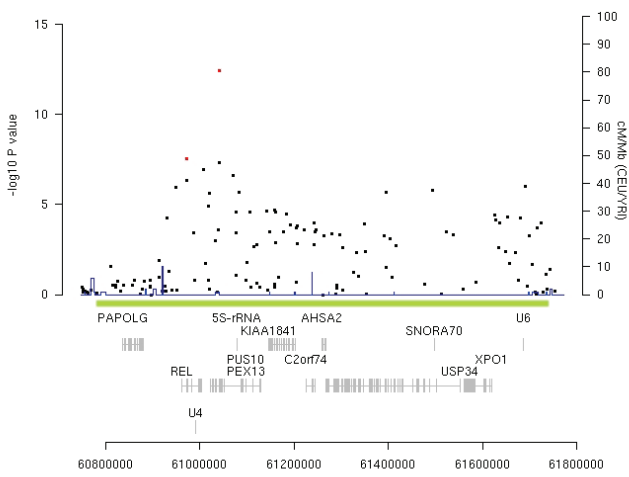

Chromosome 2

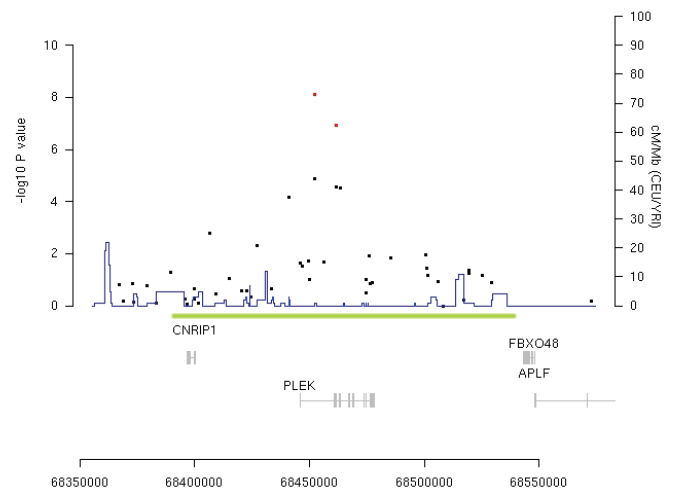

Chromosome 2

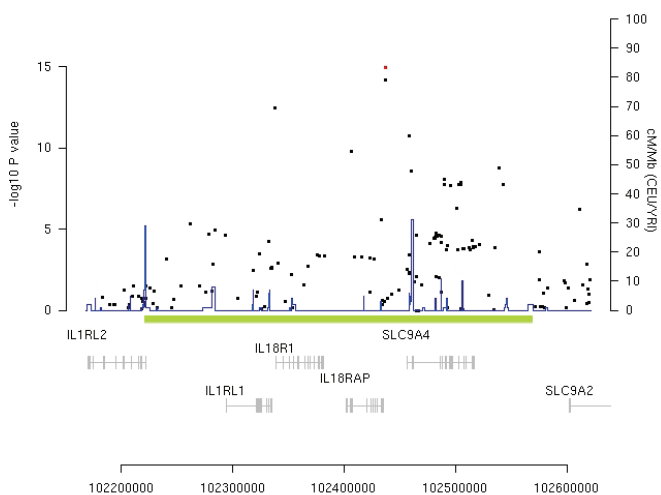

Chromosome 2

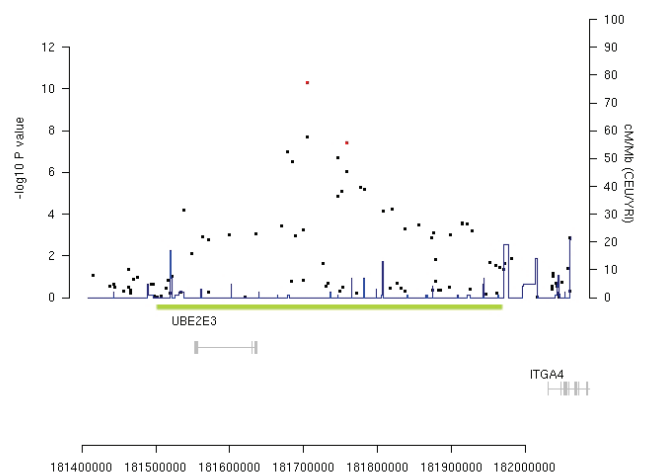

Chromosome 2

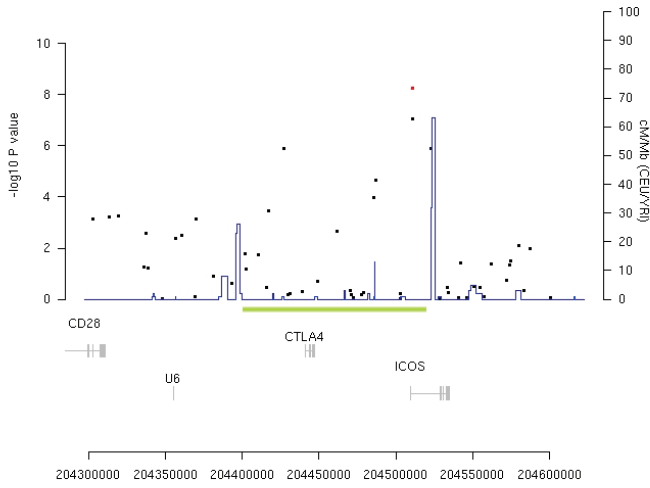

Chromosome 3

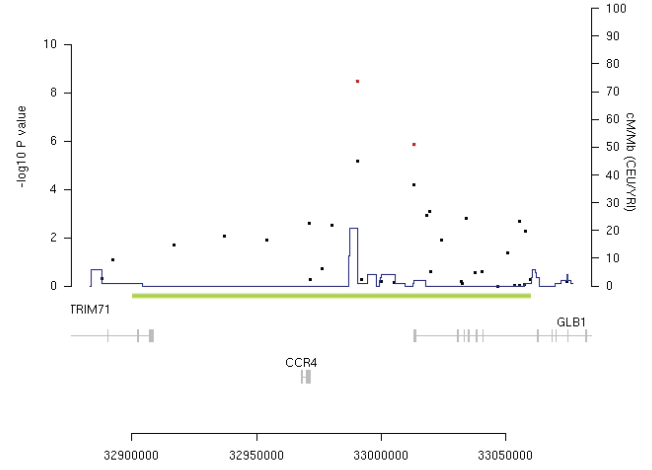

Chromosome 3

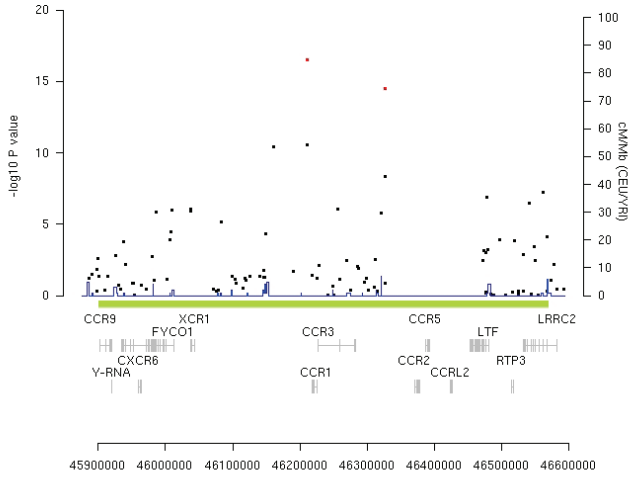

Chromosome 3

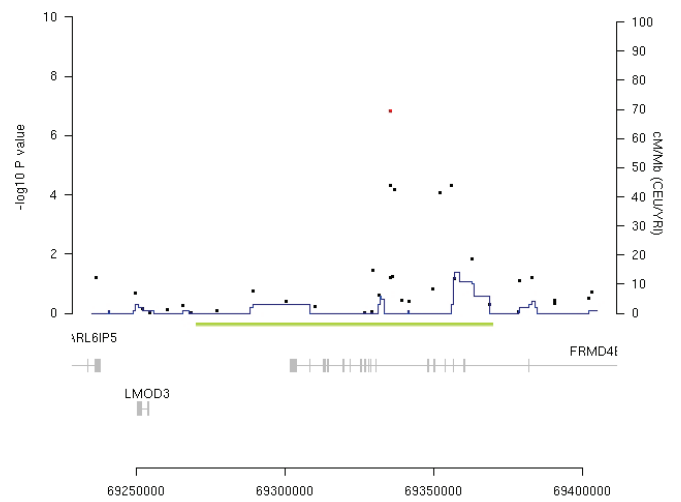

Chromosome 3

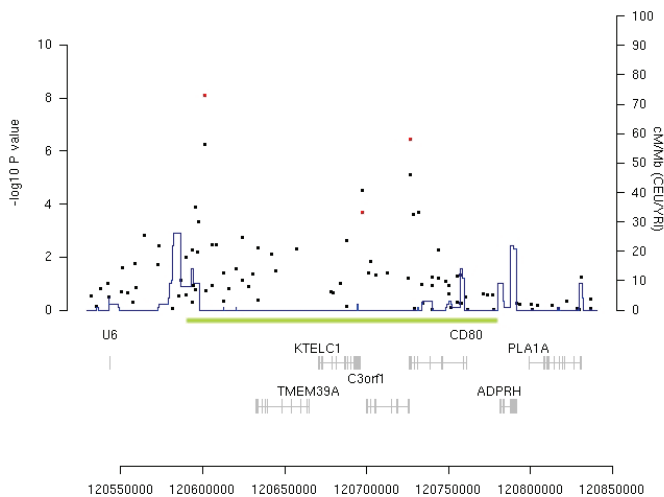

Chromosome 3

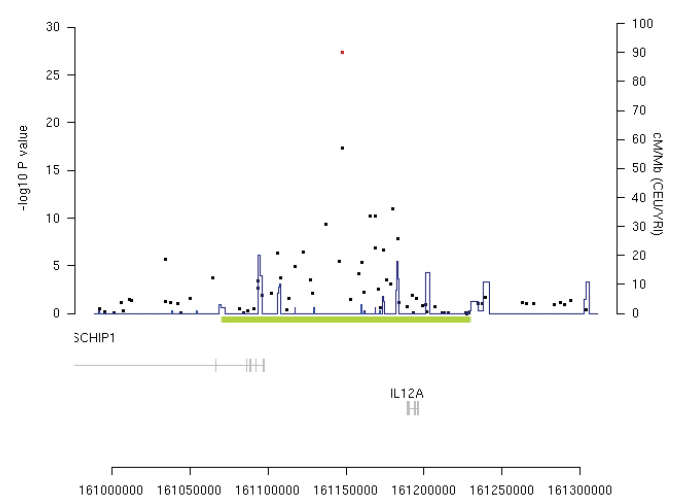

Chromosome 3

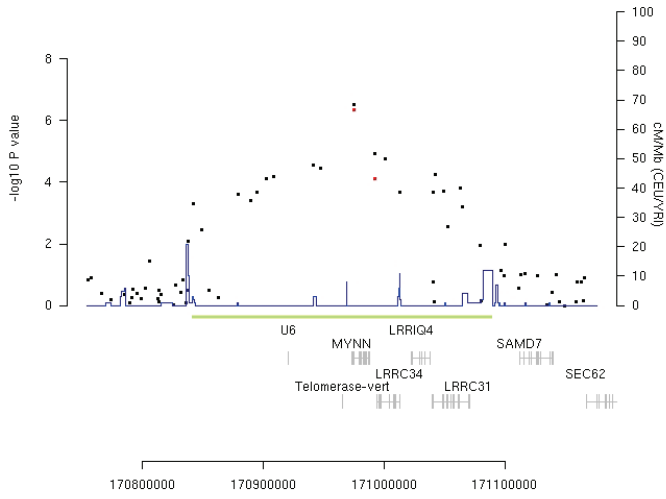

Chromosome 3

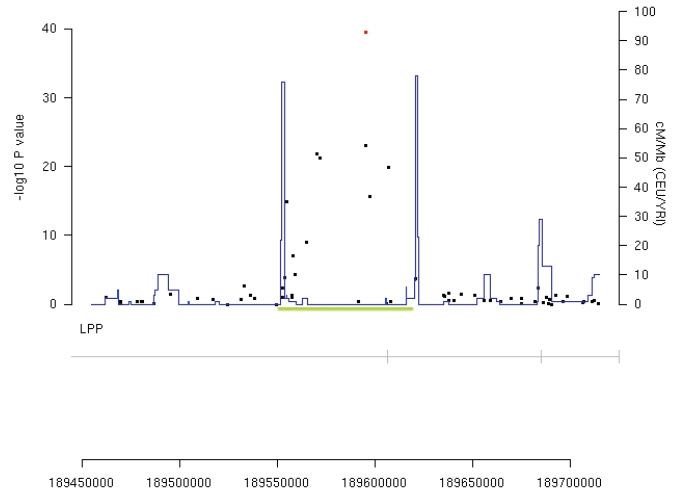

Chromosome 4

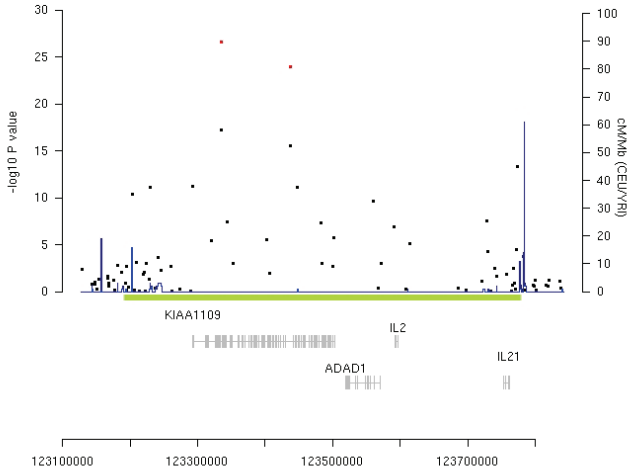

Chromosome 6

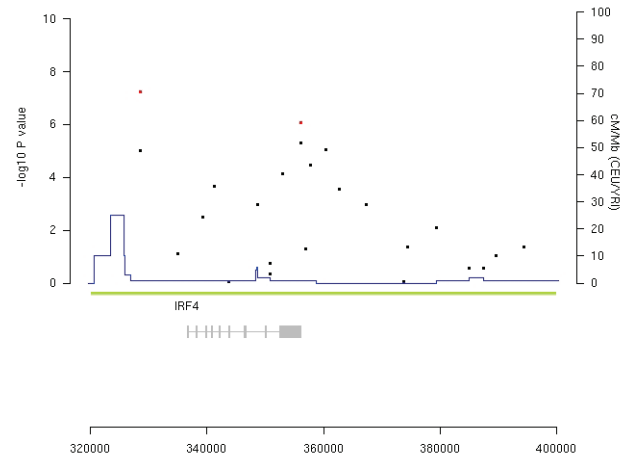

Chromosome 6

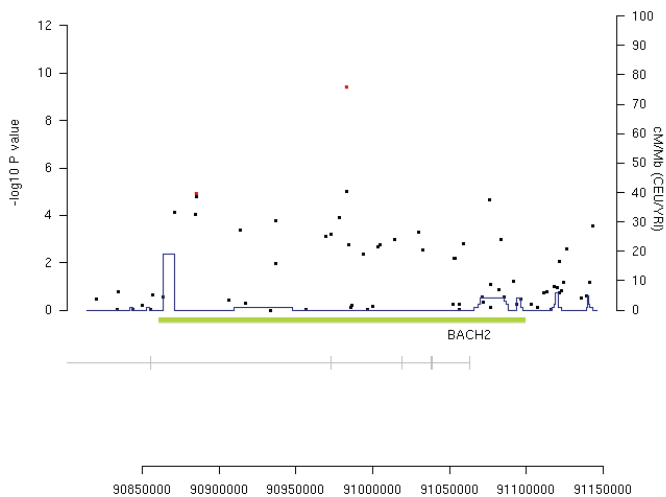

Chromosome 6

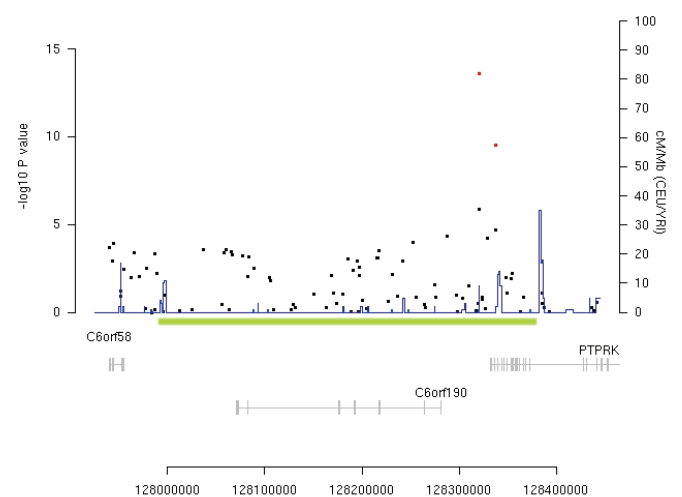

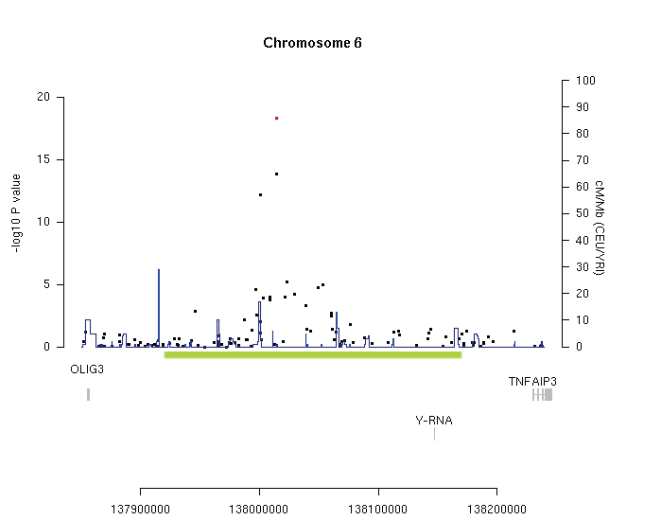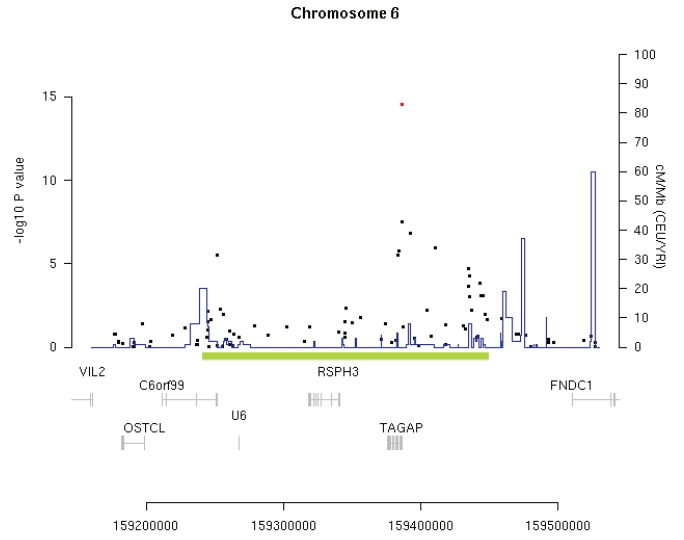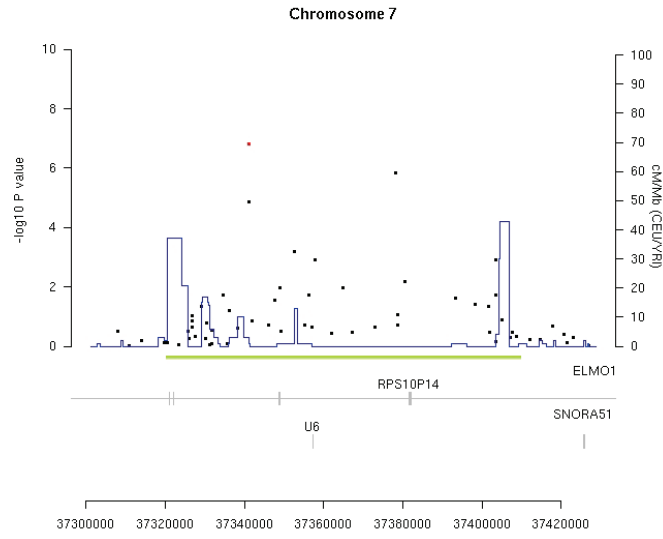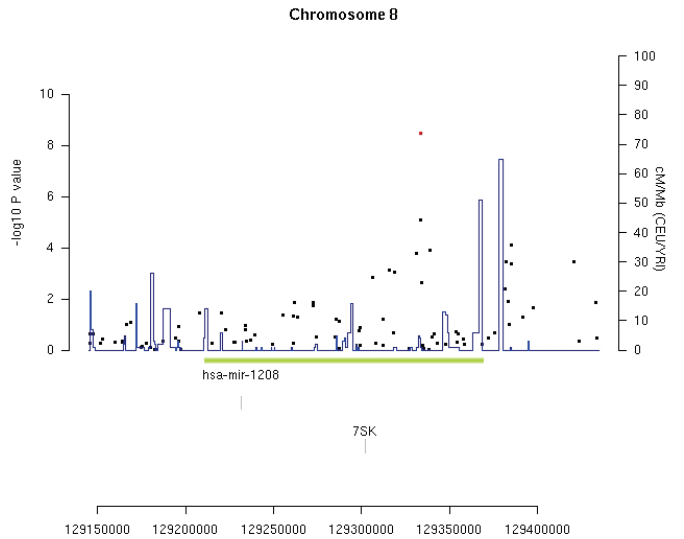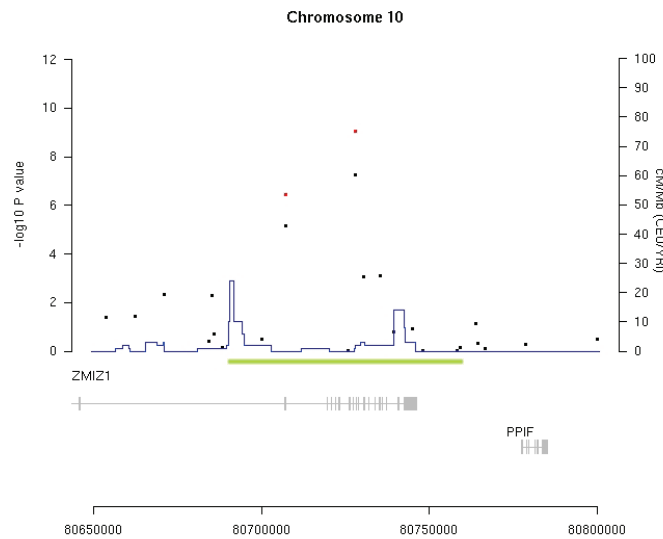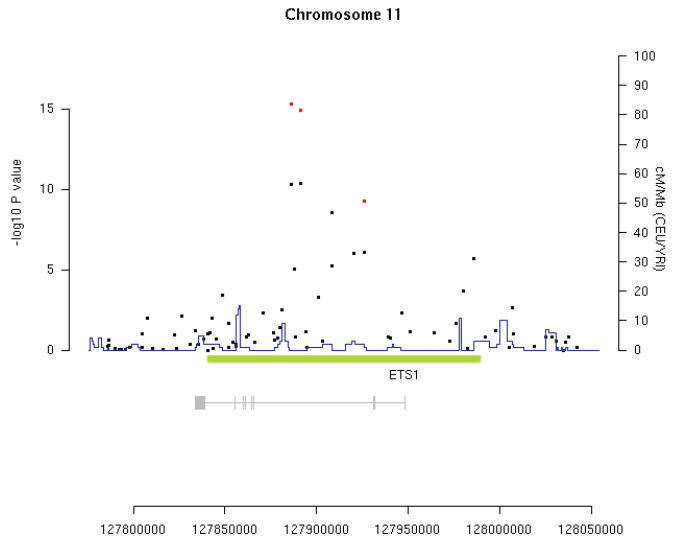

Chromosome 12

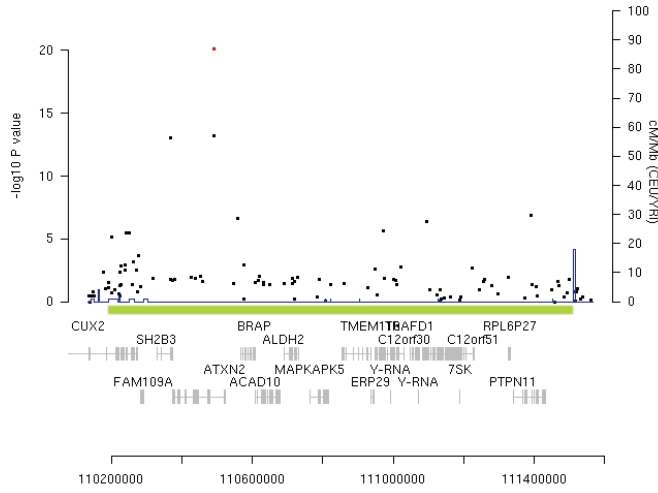

Chromosome 13

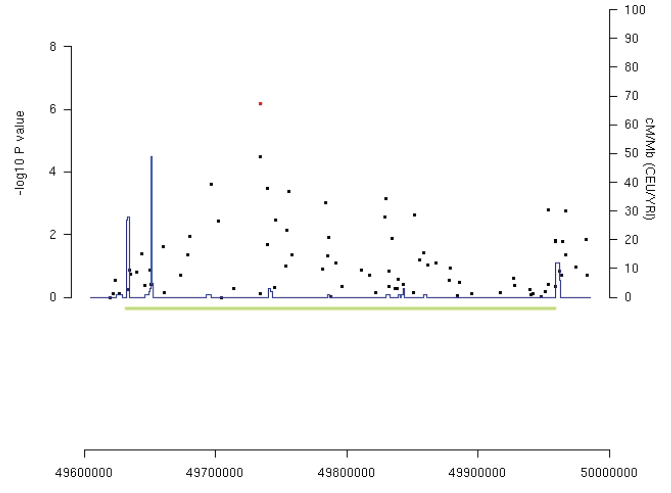

Chromosome 14

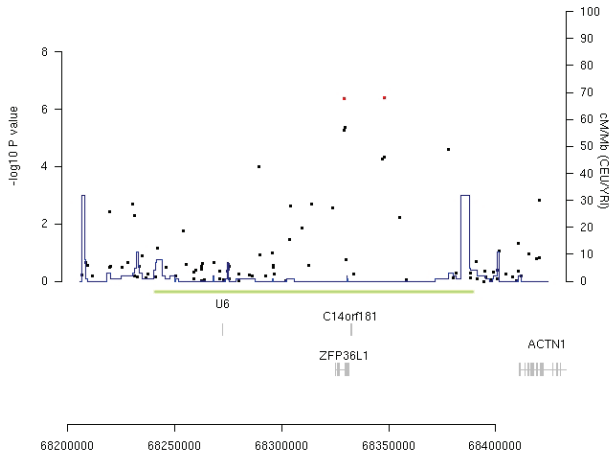

Chromosome 16

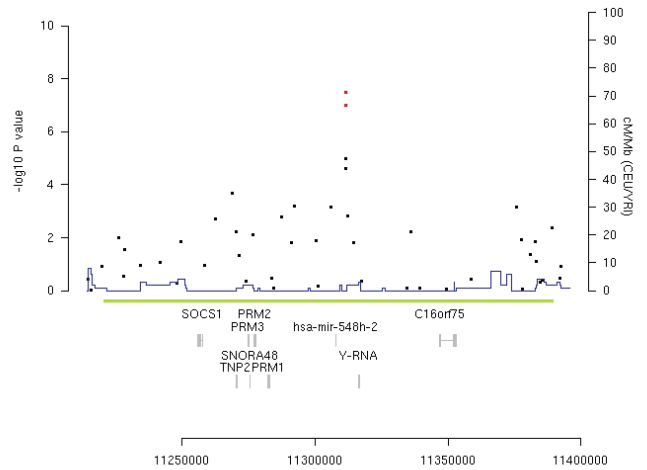

Chromosome 17

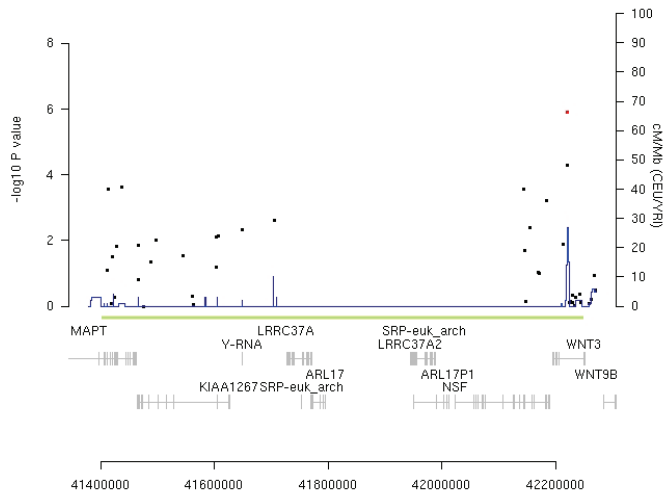

Chromosome 18

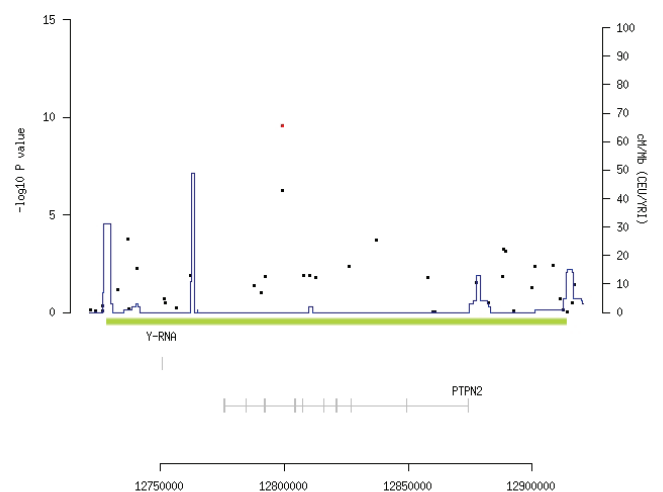

Chromosome 21

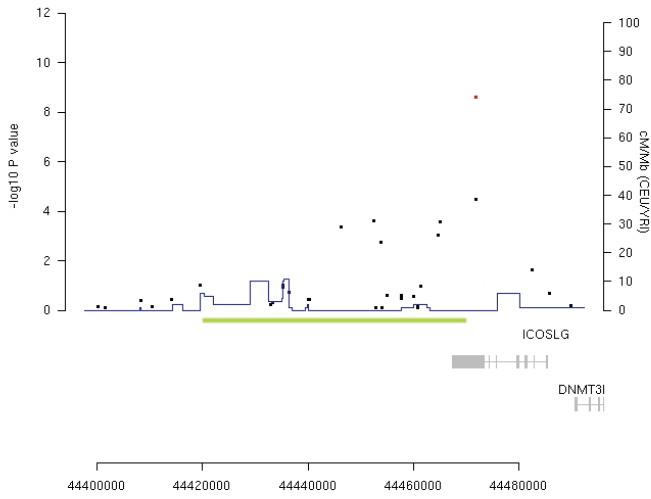

Chromosome 22

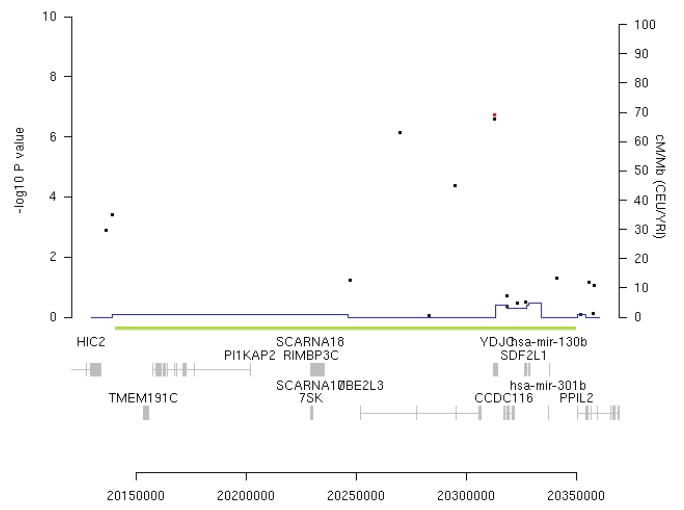

Chromosome X

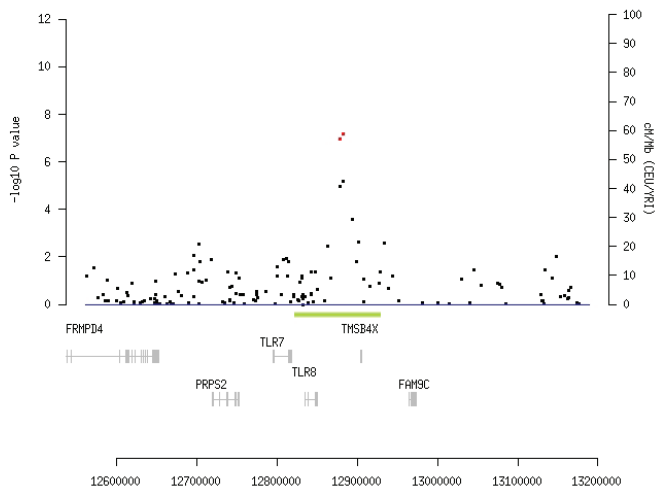

**Supplementary Figure 2** Detailed eQTL genotype - expression correlation analyses.

Individual level gene expression data (residual variance after Transcriptional Components removed) from 1469 PAXgene samples. Spearman Rank Correlation coefficients and *P* values shown for HT-12 and Ref8 data, and meta-analysis results. Right Y axis, average expression rank, is a measure of how strongly the tested probe is expressed amongst all probes in the dataset. eQTL plots are presented in descending *P* value order.



● Females  
● Males

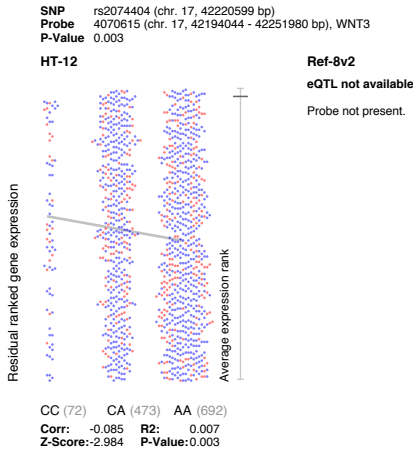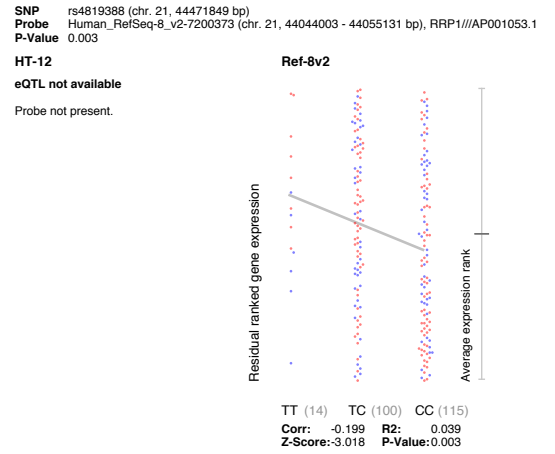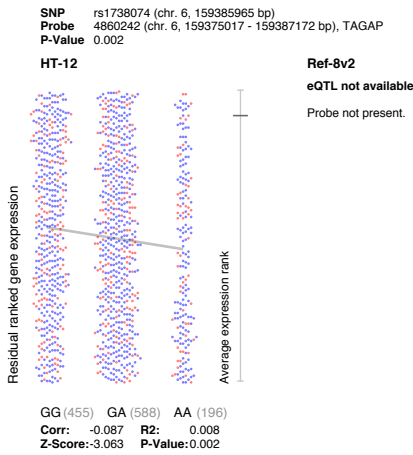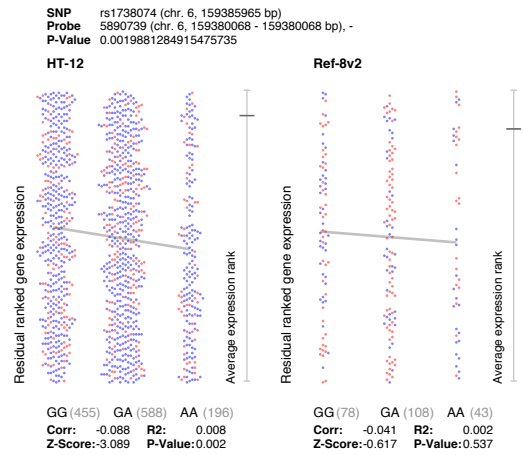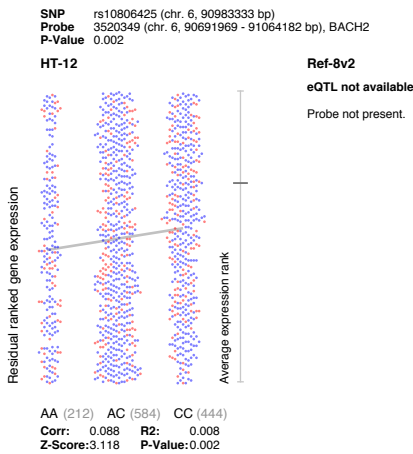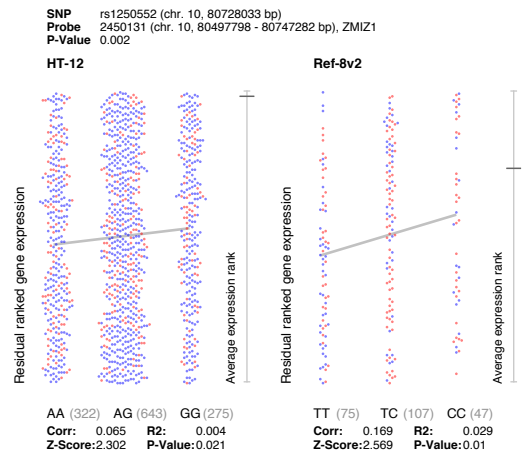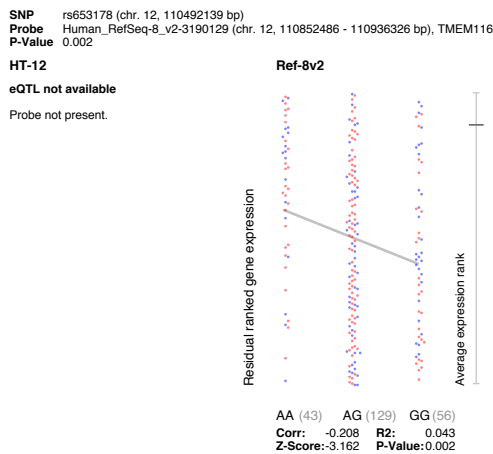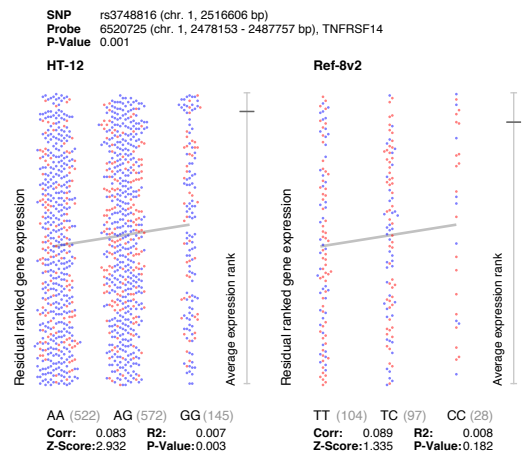

● Females

● Males

SNP rs13098911 (chr. 3, 46210205 bp)  
Probe Human\_RefSeq-8\_v2-7570670 (chr. 3, 46226186 - 46284166 bp), CCR3  
P-Value 5.69E-4

HT-12

eQTL not available

Probe not present.

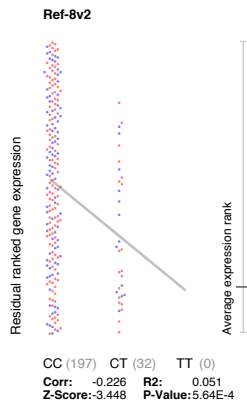

SNP rs2074404 (chr. 17, 42220599 bp)  
Probe 1410484 (chr. 17, 42022391 - 42191000 bp), NSF  
P-Value 4.28E-4

HT-12

eQTL not available

Probe not present.

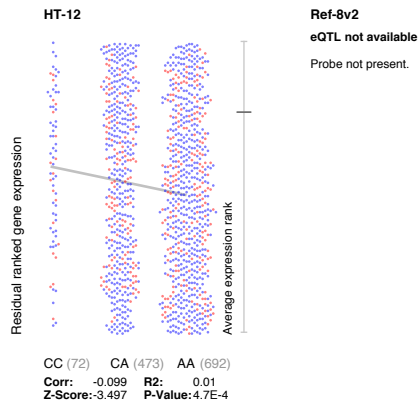

SNP rs653178 (chr. 12, 110492139 bp)  
Probe 2070736 (chr. 12, 110852486 - 110933626 bp), TMEM116  
P-Value 3.68E-4

HT-12

eQTL not available

Probe not present.

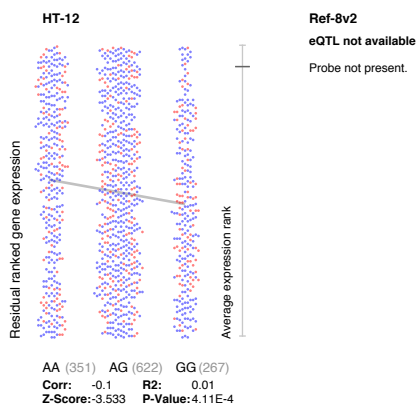

SNP rs1738074 (chr. 6, 159385965 bp)  
Probe 5360364 (chr. 6, 159375017 - 159387172 bp), TAGAP  
P-Value 3.23E-4

HT-12

eQTL not available

Probe not present.

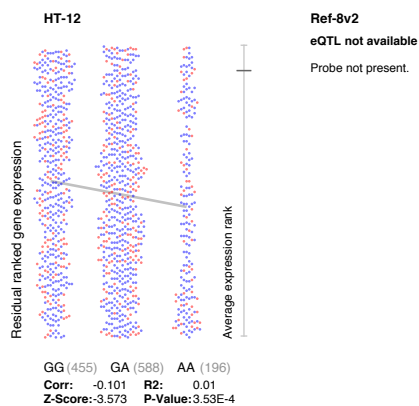

SNP rs653178 (chr. 12, 110492139 bp)  
Probe 840253 (chr. 12, 110687729 - 110733165 bp), ALDH2  
P-Value 1.44E-4

HT-12

eQTL not available

Probe not present.

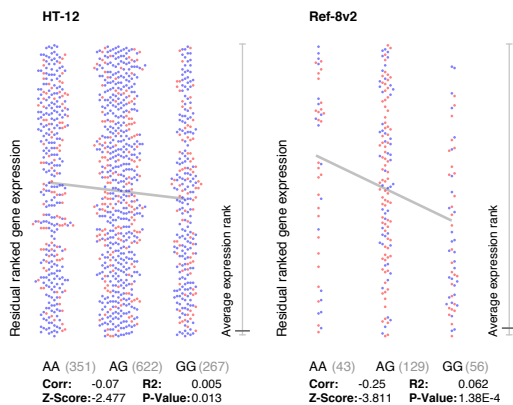

SNP rs2074404 (chr. 17, 42220599 bp)  
Probe 3520572 (chr. 17, 41796319 - 41852371 bp), ARL17//LRRC37A//LRRC37A2  
P-Value 1.17E-4

HT-12

eQTL not available

Probe not present.

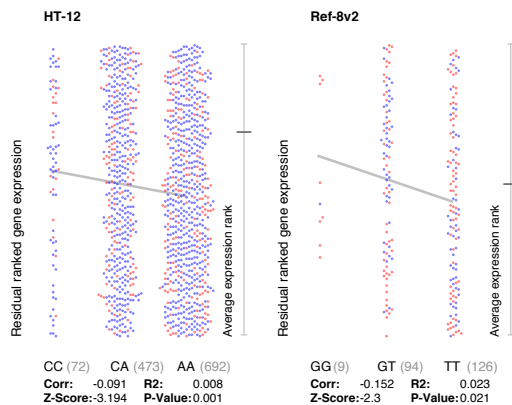

SNP rs3748816 (chr. 1, 2516606 bp)  
Probe Human\_RefSeq-8\_v2-6250338 (chr. 1, 2507097 - 2513762 bp), C1orf93  
P-Value 1.16E-4

HT-12

eQTL not available

Probe not present.

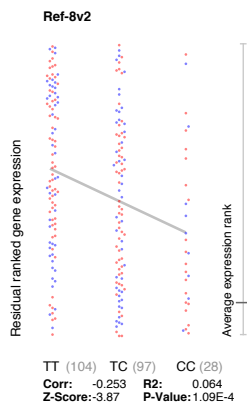

SNP rs6441961 (chr. 3, 46327388 bp)  
Probe Human\_RefSeq-8\_v2-7570670 (chr. 3, 46226186 - 46284166 bp), CCR3  
P-Value 1.02E-4

HT-12

eQTL not available

Probe not present.

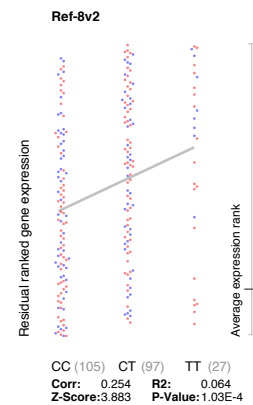

● Females  
● Males

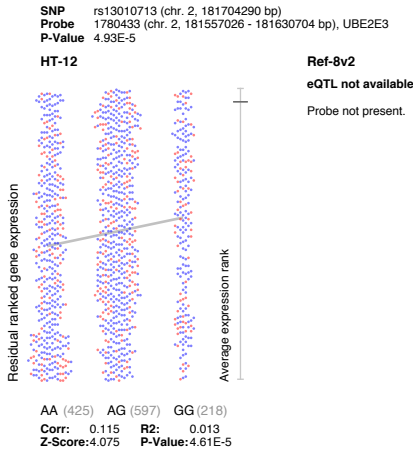

Ref-8v2  
eQTL not available  
Probe not present.

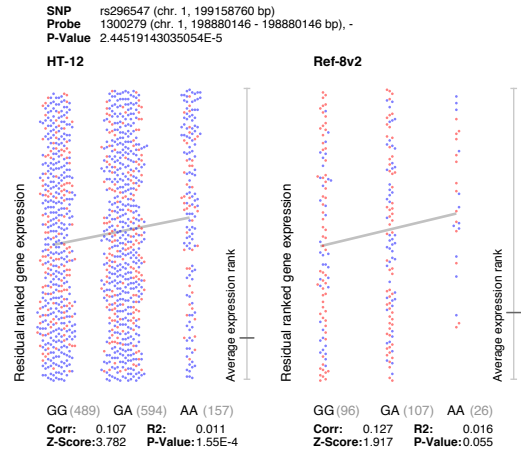

Ref-8v2

Residual ranked gene expression

Average expression rank

GG (96) GA (107) AA (26)  
Corr: 0.127 R2: 0.016  
Z-Score:1.917 P-Value:0.055

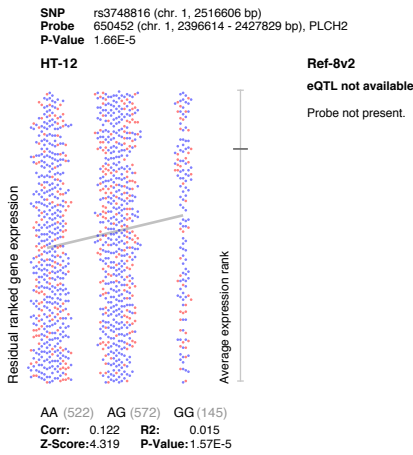

Ref-8v2  
eQTL not available  
Probe not present.

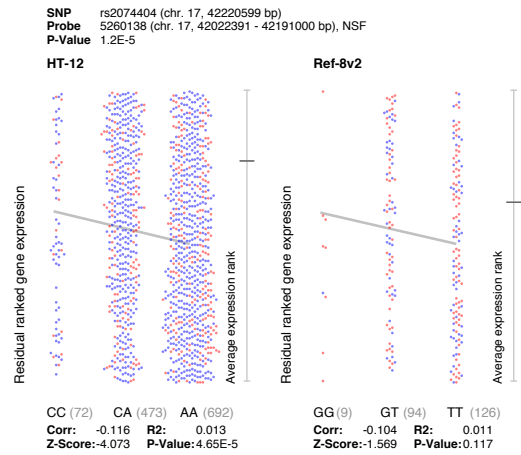

Ref-8v2

Residual ranked gene expression

Average expression rank

GG (9) GT (94) TT (126)  
Corr: -0.104 R2: 0.011  
Z-Score:-1.569 P-Value:0.117

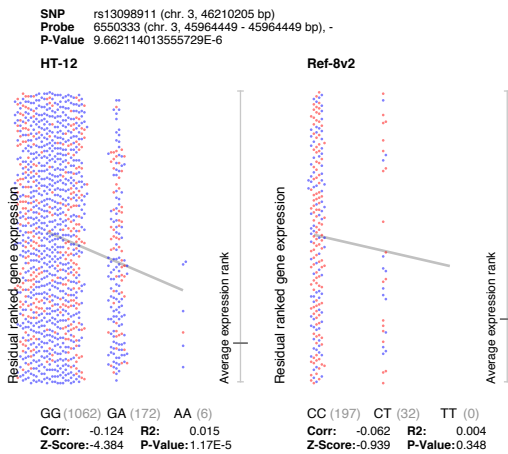

Ref-8v2

Residual ranked gene expression

Average expression rank

CC (197) CT (32) TT (0)  
Corr: -0.062 R2: 0.004  
Z-Score:-0.939 P-Value:0.348

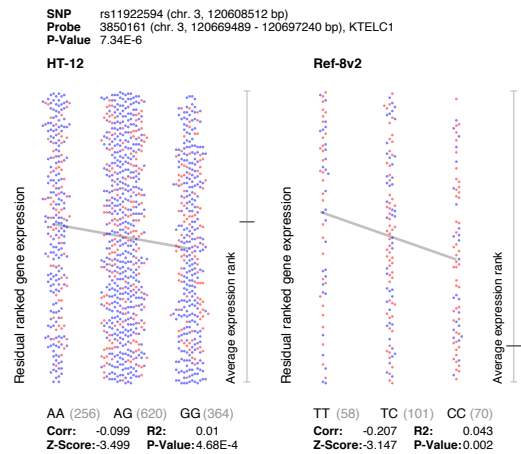

Ref-8v2

Residual ranked gene expression

Average expression rank

TT (58) TC (101) CC (70)  
Corr: -0.207 R2: 0.043  
Z-Score:-3.147 P-Value:0.002

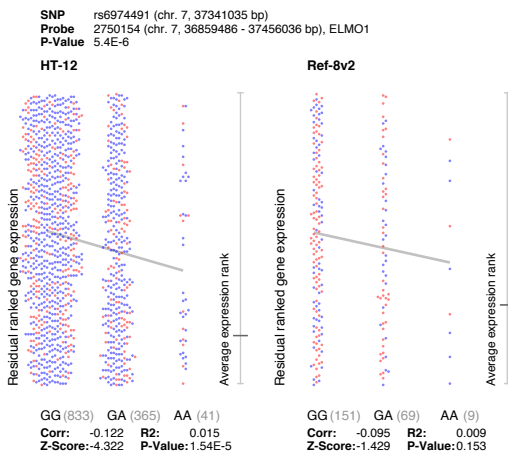

Ref-8v2

Residual ranked gene expression

Average expression rank

GG (151) GA (69) AA (9)  
Corr: -0.095 R2: 0.009  
Z-Score:-1.429 P-Value:0.153

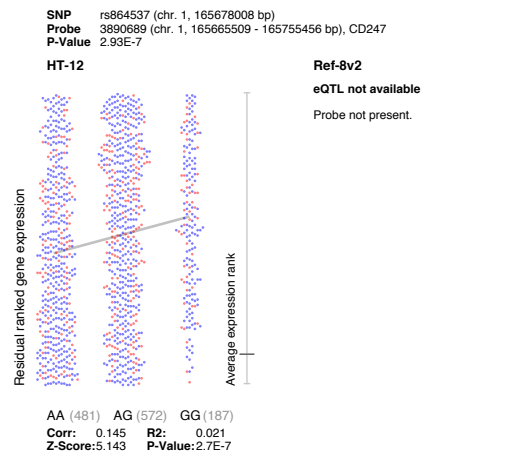

Ref-8v2  
eQTL not available  
Probe not present.

● Females

● Males

SNP rs5979785 (chr. 23, 12881445 bp)  
 Probe 3390612 (chr. 23, 12833679 - 12852209 bp), TLR8  
 P-Value 1.07E-7

HT-12

Ref-8v2

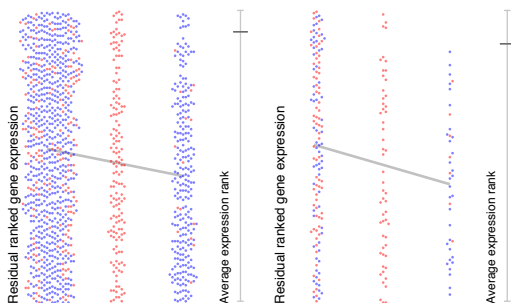

AA (826) AG (155) GG (259)  
 Corr: -0.132 R2: 0.017  
 Z-Score:-4.663 P-Value:3.12E-6

TT (136) TC (55) CC (38)  
 Corr: -0.173 R2: 0.03  
 Z-Score:-2.617 P-Value:0.009

SNP rs12928822 (chr. 16, 11311394 bp)  
 Probe 4540072 (chr. 16, 11317137 - 11354118 bp), AC009121.6  
 P-Value 1.02E-8

HT-12

Ref-8v2

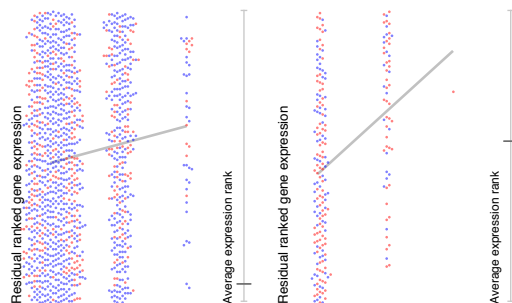

GG (865) GA (334) AA (41)  
 Corr: 0.115 R2: 0.013  
 Z-Score:4.063 P-Value:4.85E-5

CC (167) CT (61) TT (1)  
 Corr: 0.327 R2: 0.107  
 Z-Score:5.065 P-Value:4.09E-7

SNP rs2074404 (chr. 17, 42220599 bp)  
 Probe 4880037 (chr. 17, 42485154 - 42485154 bp), -  
 P-Value 1.7789864987600641E-9

HT-12

Ref-8v2

eQTL not available  
 Probe not present.

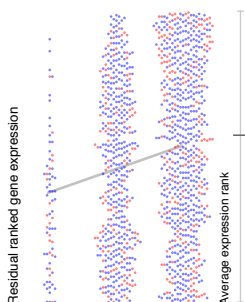

CC (72) CA (473) AA (692)  
 Corr: 0.17 R2: 0.029  
 Z-Score:6.034 P-Value:1.6E-9

SNP rs13098911 (chr. 3, 46210205 bp)  
 Probe 2190671 (chr. 3, 46226186 - 46284166 bp), CCR3  
 P-Value 5.5E-10

HT-12

Ref-8v2

eQTL not available  
 Probe not present.

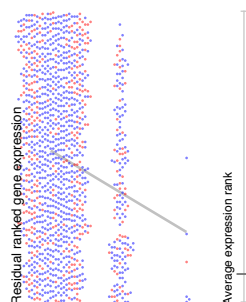

GG (1062) GA (172) AA (6)  
 Corr: -0.174 R2: 0.03  
 Z-Score:-6.18 P-Value:6.4E-10

SNP rs842647 (chr. 2, 60972975 bp)  
 Probe 1170220 (chr. 2, 61257057 - 61270564 bp), AHS2  
 P-Value 3.3E-10

HT-12

Ref-8v2

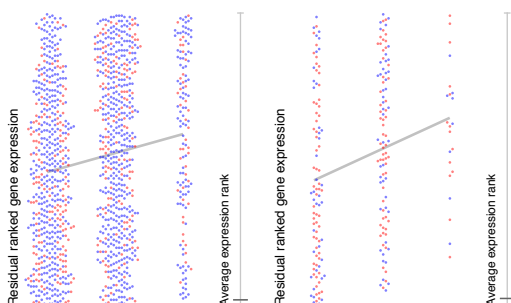

AA (542) AG (557) GG (140)  
 Corr: 0.151 R2: 0.023  
 Z-Score:5.328 P-Value:9.91E-8

AA (101) AG (106) GG (22)  
 Corr: 0.235 R2: 0.055  
 Z-Score:3.582 P-Value:3.41E-4

SNP rs13003464 (chr. 2, 61040333 bp)  
 Probe 1170220 (chr. 2, 61257057 - 61270564 bp), AHS2  
 P-Value 6.39E-11

HT-12

Ref-8v2

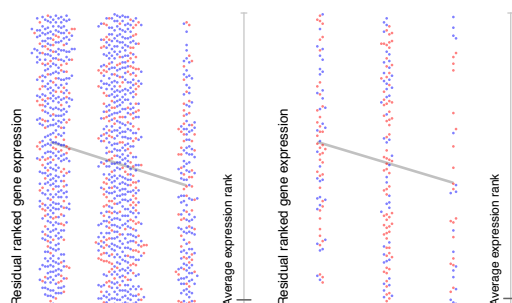

AA (452) AG (611) GG (176)  
 Corr: -0.17 R2: 0.029  
 Z-Score:-6.026 P-Value:1.68E-9

AA (75) AG (118) GG (36)  
 Corr: -0.162 R2: 0.026  
 Z-Score:-2.458 P-Value:0.014

SNP rs653178 (chr. 12, 110492139 bp)  
 Probe 6560301 (chr. 12, 110350268 - 110448836 bp), SH2B3//ATXN2  
 P-Value 9.24E-12

HT-12

Ref-8v2

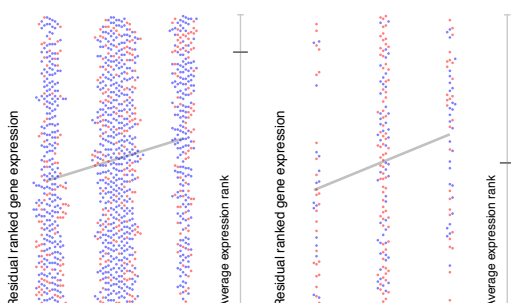

AA (351) AG (622) GG (267)  
 Corr: 0.171 R2: 0.029  
 Z-Score:6.057 P-Value:1.38E-9

AA (43) AG (129) GG (56)  
 Corr: 0.215 R2: 0.046  
 Z-Score:3.268 P-Value:0.001

SNP rs5979785 (chr. 23, 12881445 bp)  
 Probe 6480360 (chr. 23, 12833679 - 12852209 bp), TLR8  
 P-Value 3.88E-13

HT-12

Ref-8v2

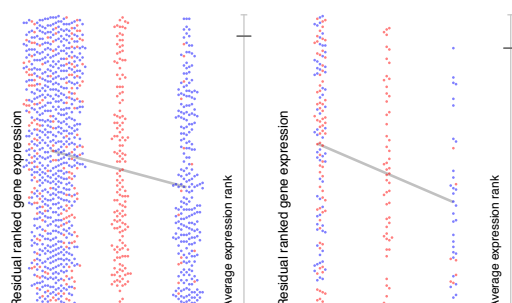

AA (826) AG (155) GG (259)  
 Corr: -0.174 R2: 0.03  
 Z-Score:-6.171 P-Value:6.79E-10

TT (136) TC (55) CC (38)  
 Corr: -0.259 R2: 0.067  
 Z-Score:-3.958 P-Value:7.55E-5

● Females  
● Males

SNP rs12727642 (chr. 1, 7969259 bp)  
Probe 610193 (chr. 1, 7943348 - 7968928 bp), PARK7  
P-Value 9.76E-15

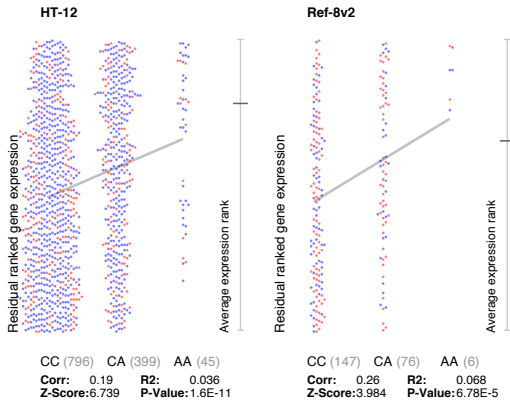

SNP rs11922594 (chr. 3, 120608512 bp)  
Probe 6550288 (chr. 3, 120669489 - 120697240 bp), KTELC1  
P-Value 5.09E-17

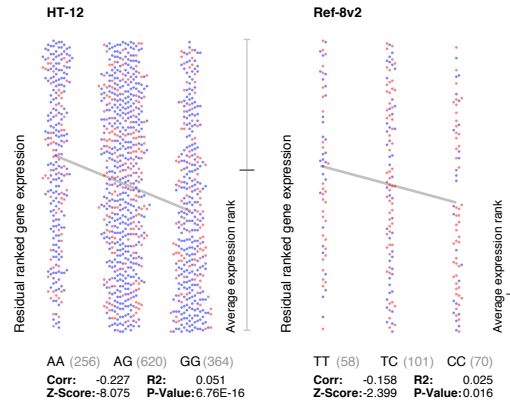

SNP rs6441961 (chr. 3, 46327388 bp)  
Probe 2190671 (chr. 3, 46226186 - 46284166 bp), CCR3  
P-Value 2.87E-19

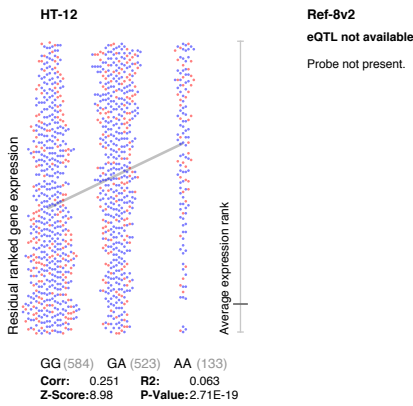

SNP rs3748816 (chr. 1, 2516606 bp)  
Probe 2070246 (chr. 1, 2510941 - 2555289 bp), MMEL1  
P-Value 1.03E-20

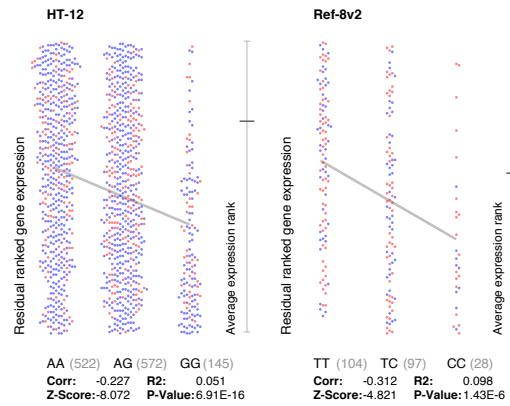

SNP rs3816281 (chr. 2, 68461451 bp)  
Probe 4810020 (chr. 2, 68444826 - 68479088 bp), PLEK  
P-Value 7.97E-26

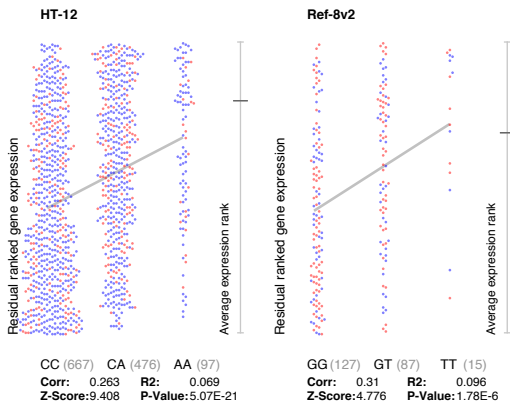

SNP rs917997 (chr. 2, 102437000 bp)  
Probe 6520180 (chr. 2, 102400686 - 102436457 bp), IL18RAP  
P-Value 7.35E-87

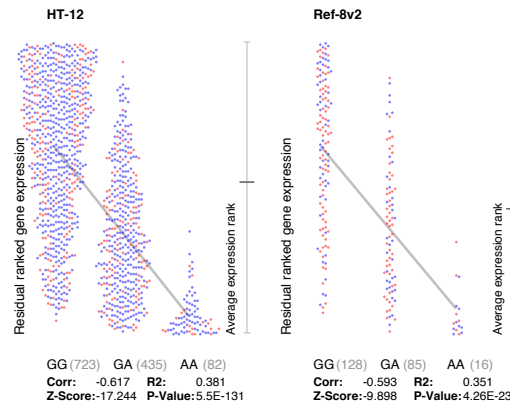

SNP rs2298428 (chr. 22, 20312892 bp)  
Probe 1230242 (chr. 22, 20308188 - 20308188 bp), -  
P-Value 1.955586158829425E-90

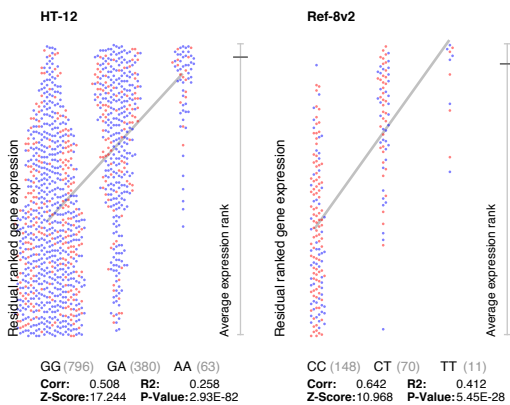

SNP rs864537 (chr. 1, 165678008 bp)  
Probe 6290400 (chr. 1, 165665509 - 165755456 bp), CD247  
P-Value 1.77E-9

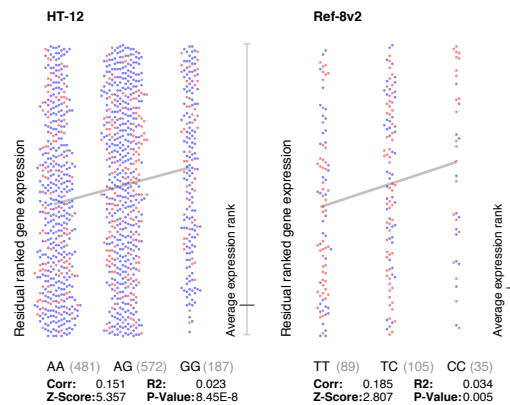

**Supplementary Figure 3** Co-localisation of case/control association and genotype-expression correlation (eQTL) signals.

Plots shown for regions described in Table 3. Chromosomal positions based on NCBI Build 36 co-ordinates.  $P_{\text{GWAS}}$  values (black points and black line) are from 4,533 cases and 10,750 controls.  $P_{\text{combined}}$  values (red points) are from 9,451 cases and 16,434 controls. Genotype-expression correlation P values for SNP positions across the genome at each tested eQTL are shown in a different colour for each probe (annotated with Illumina ArrayAddressID and gene name).

# Chromosome 1

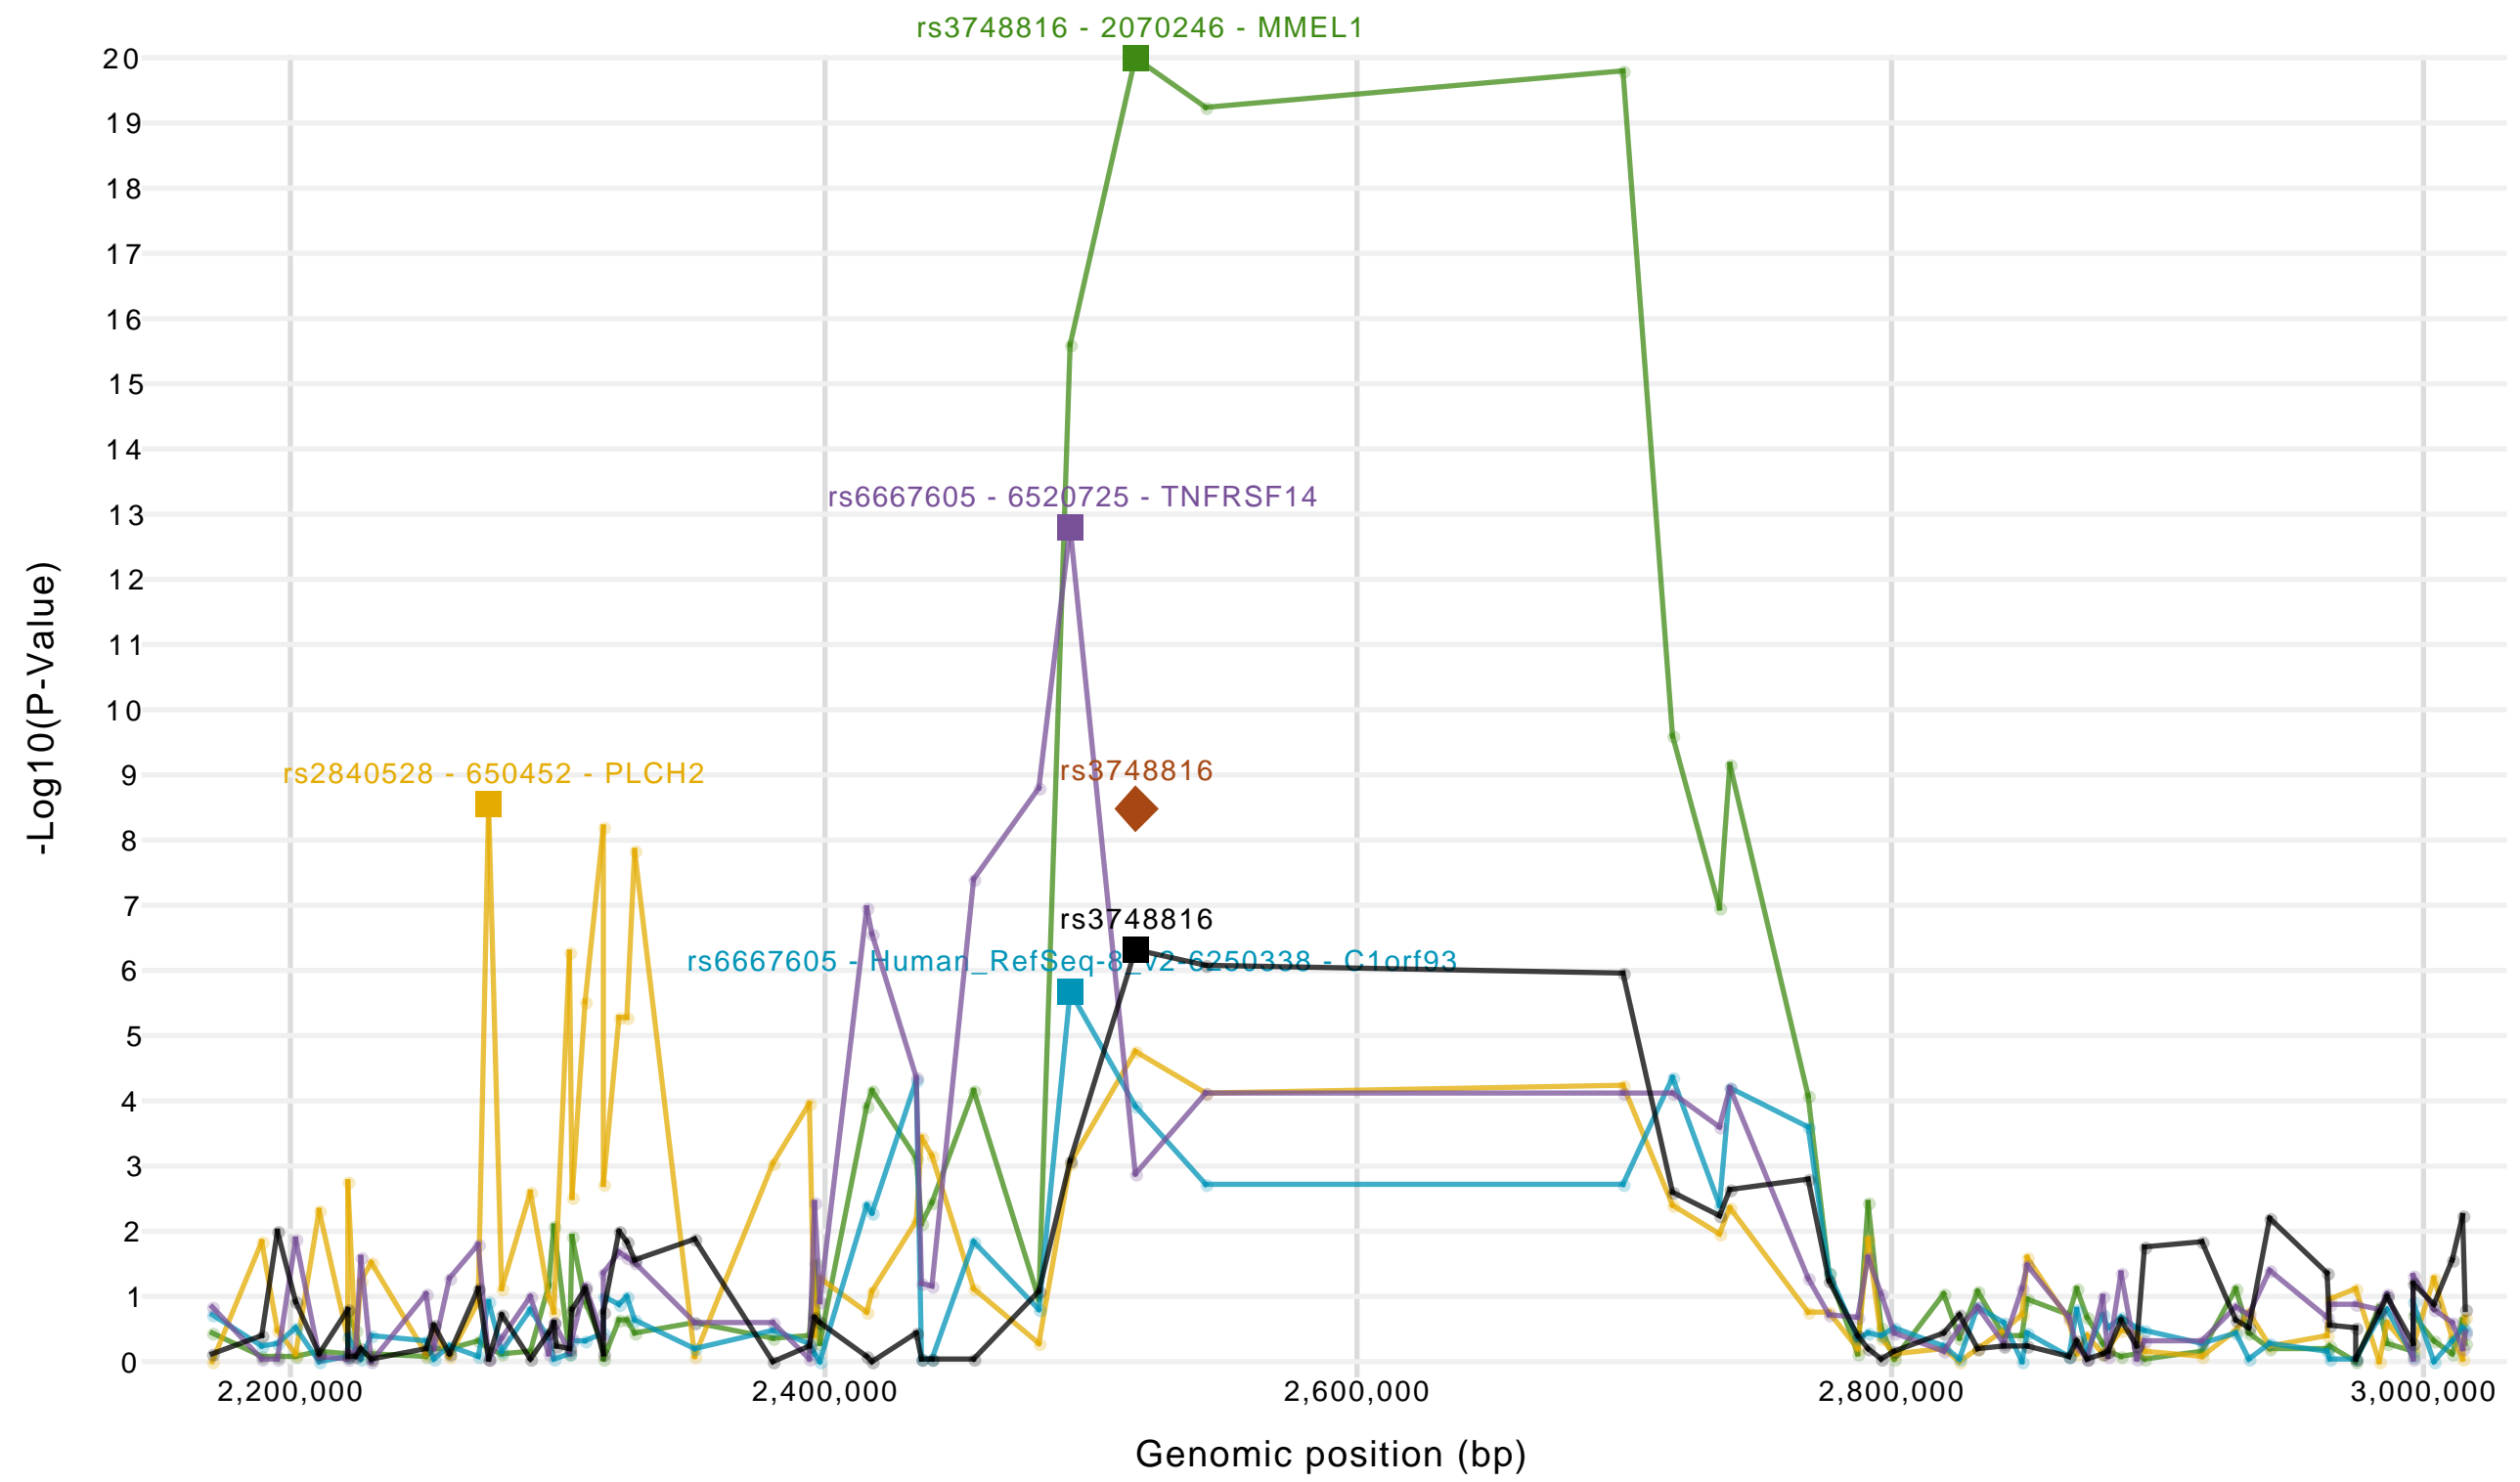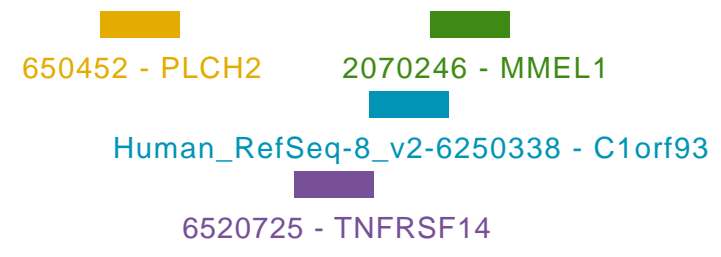

Chromosome 1

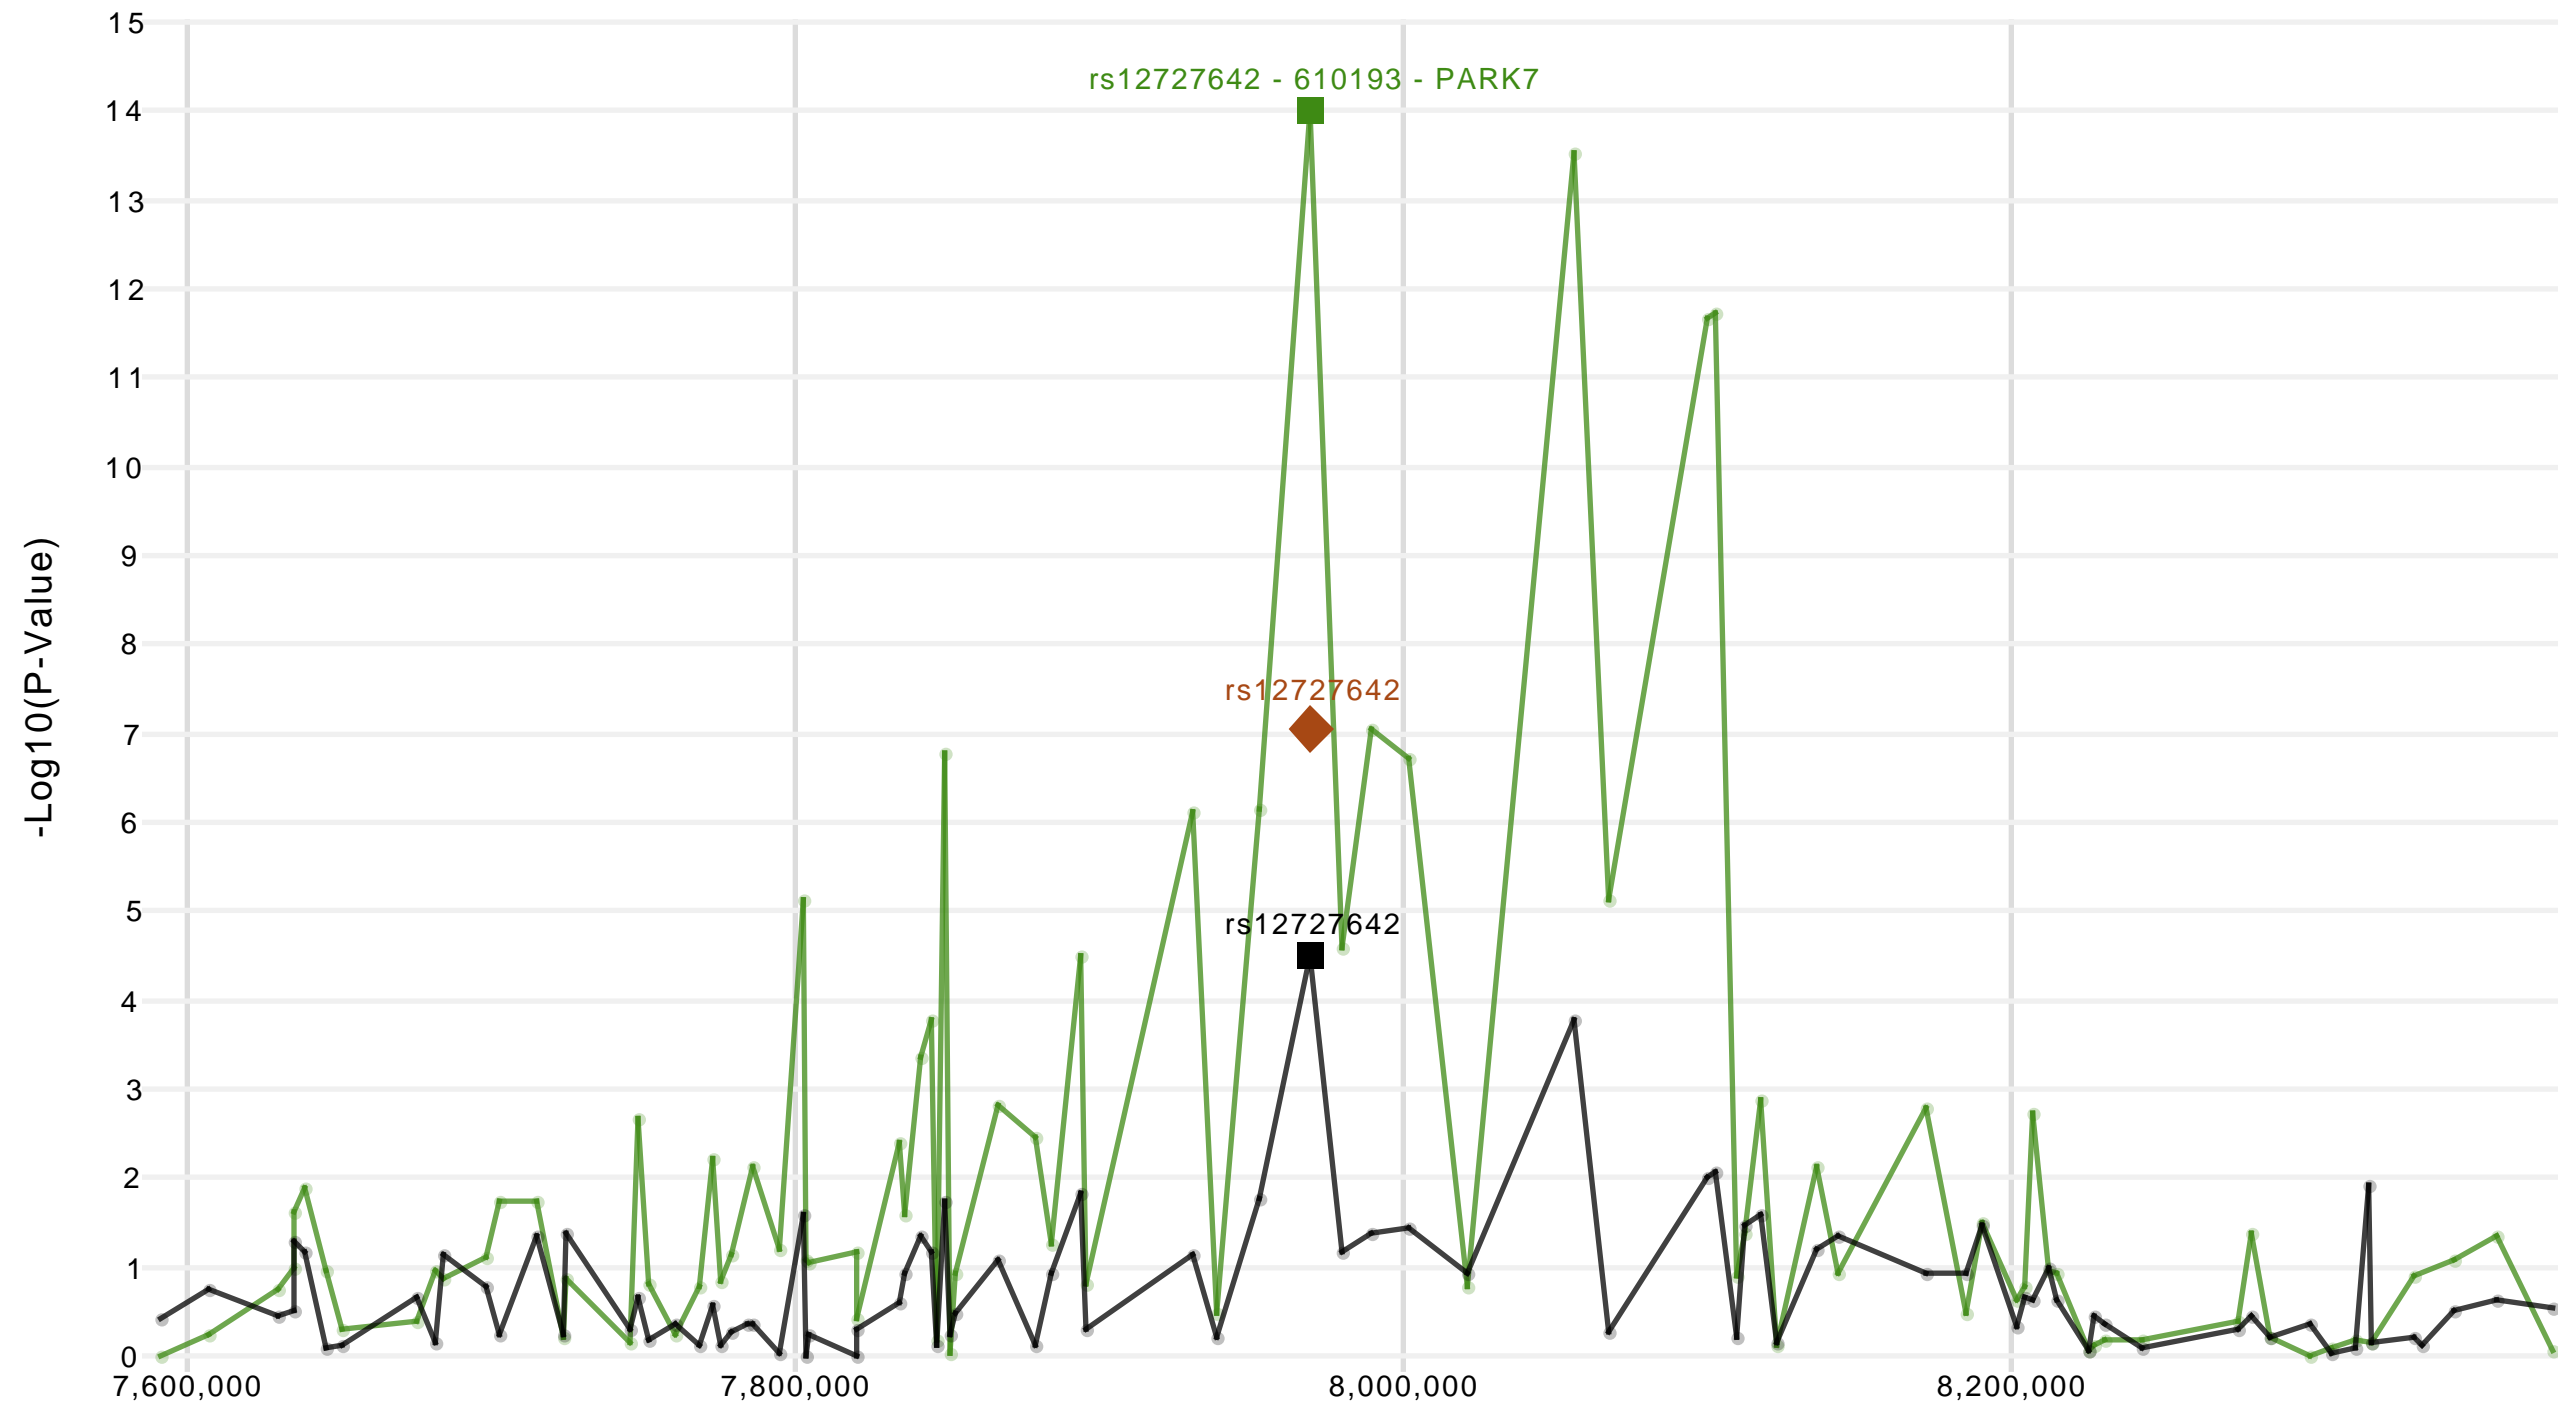



# Chromosome 1

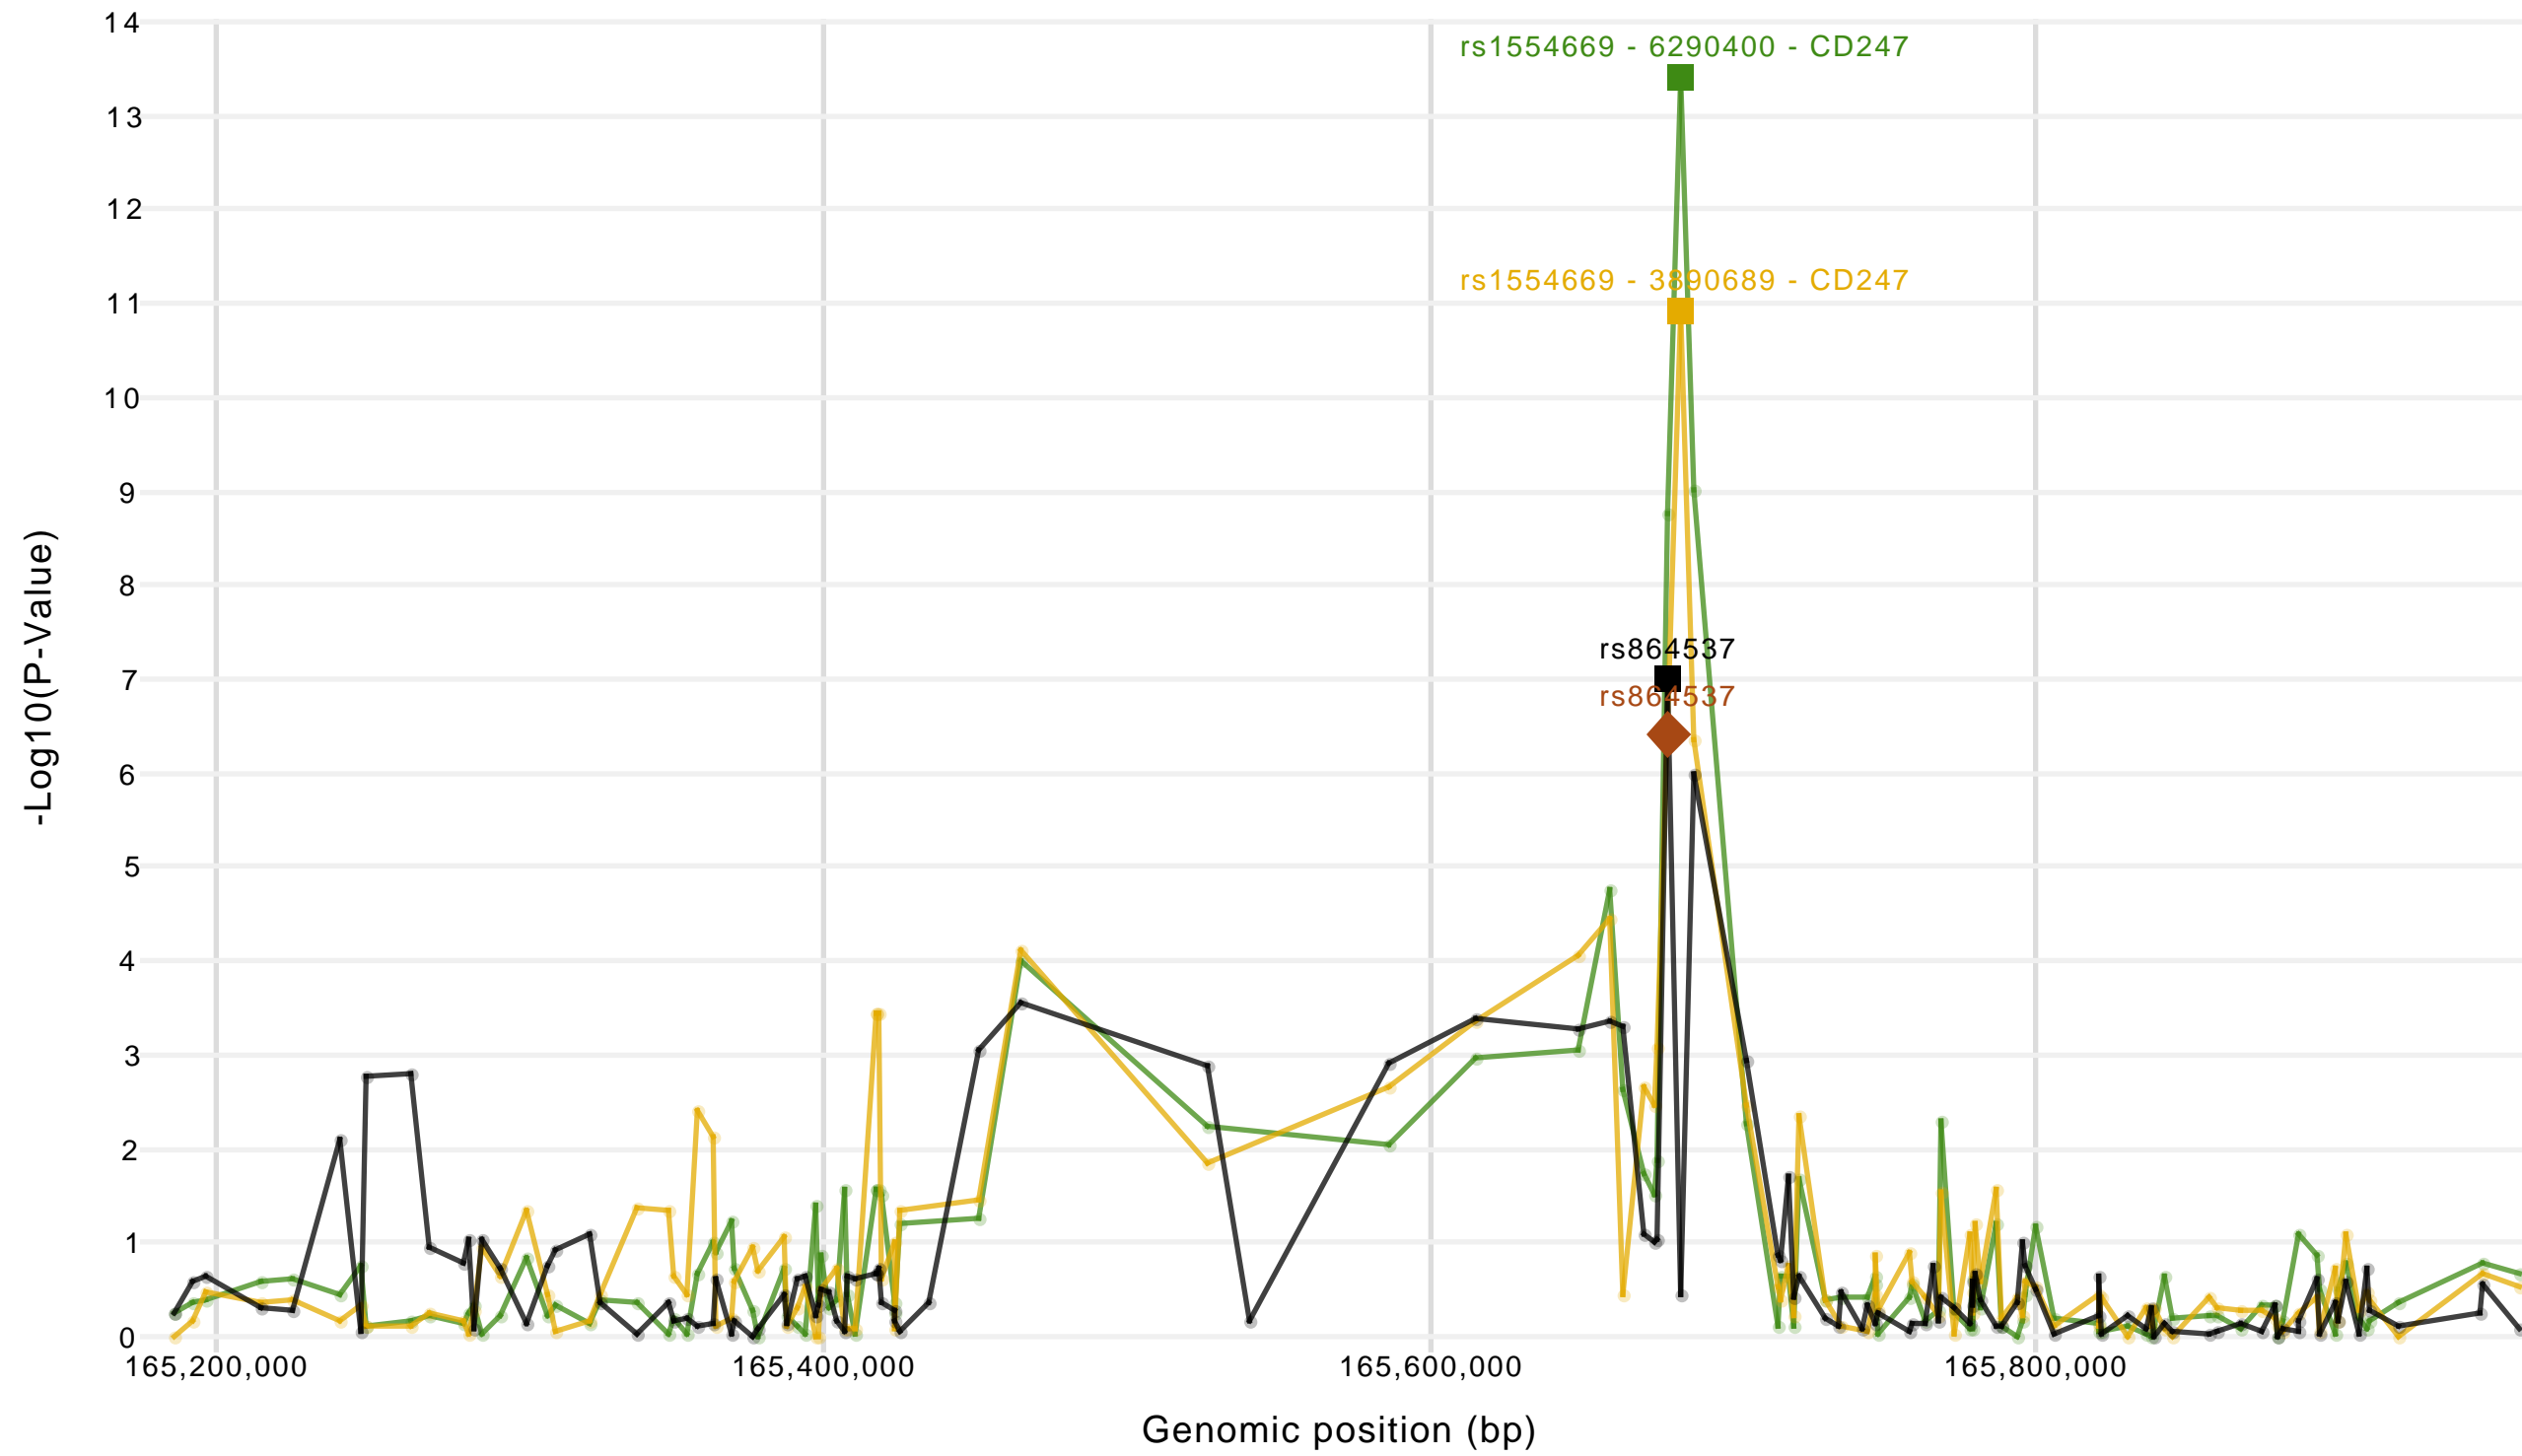

6290400 - CD247  
3890689 - CD247

Chromosome 1

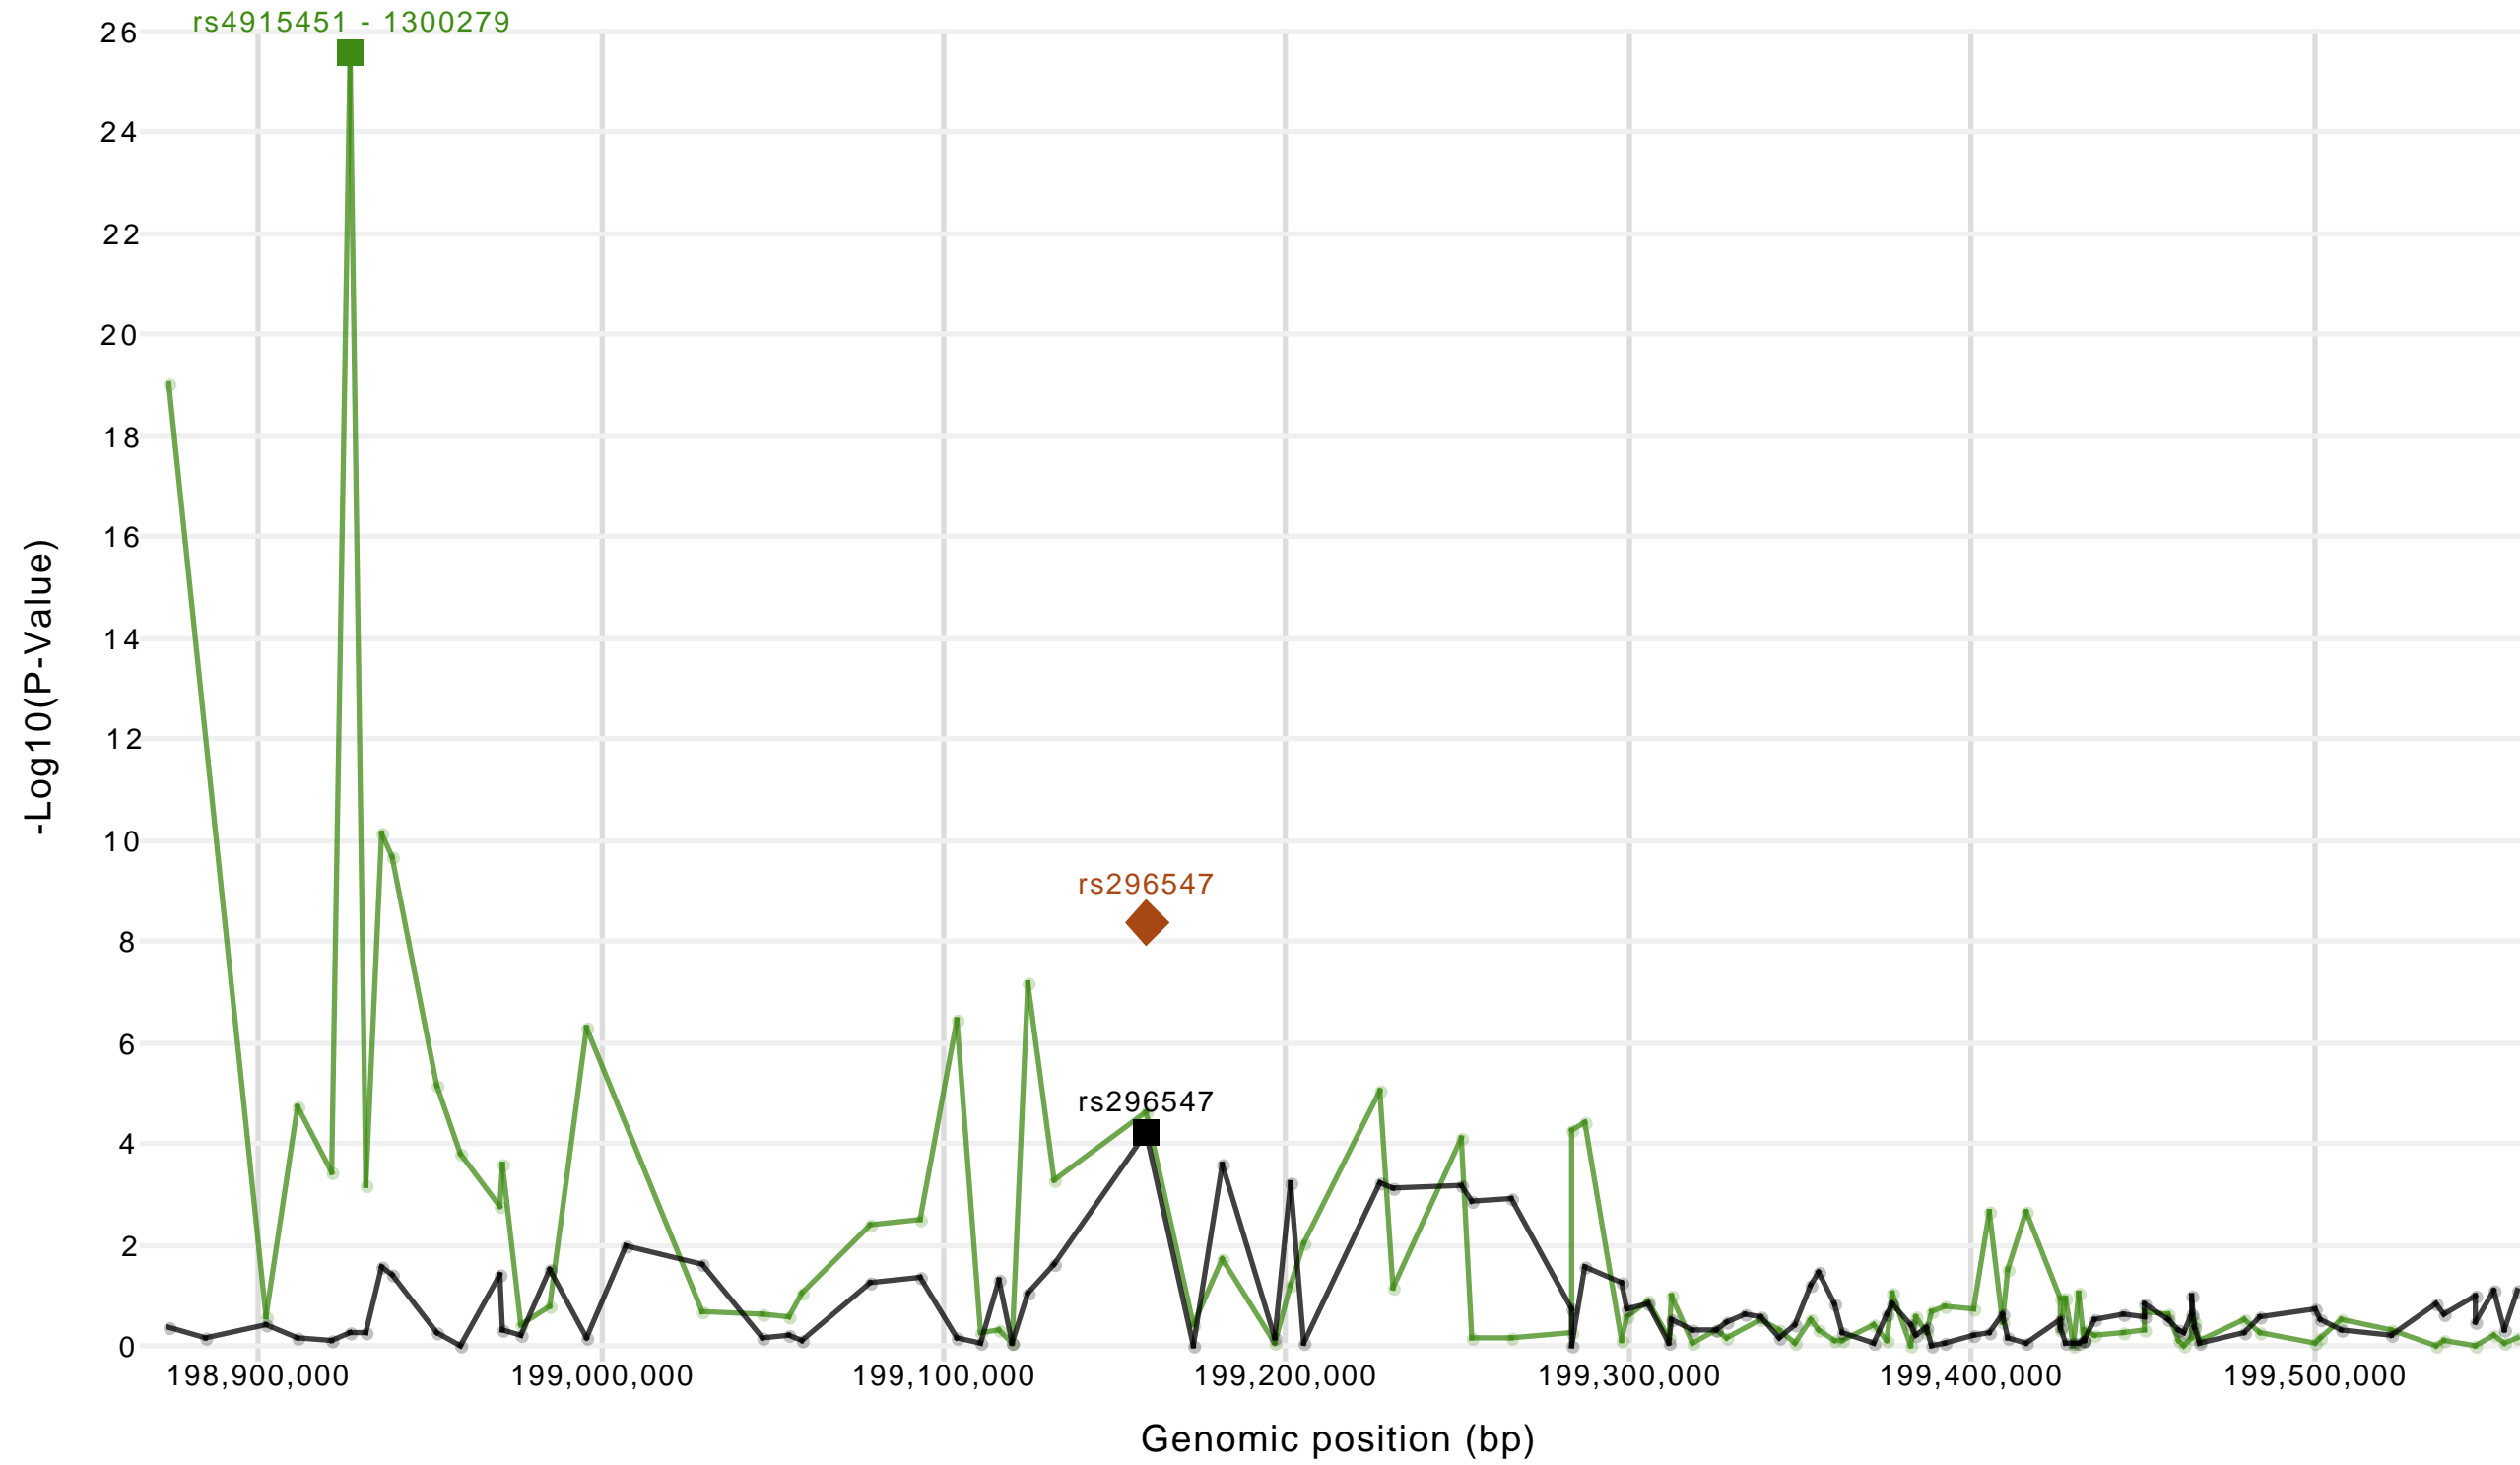

1300279

# Chromosome 2

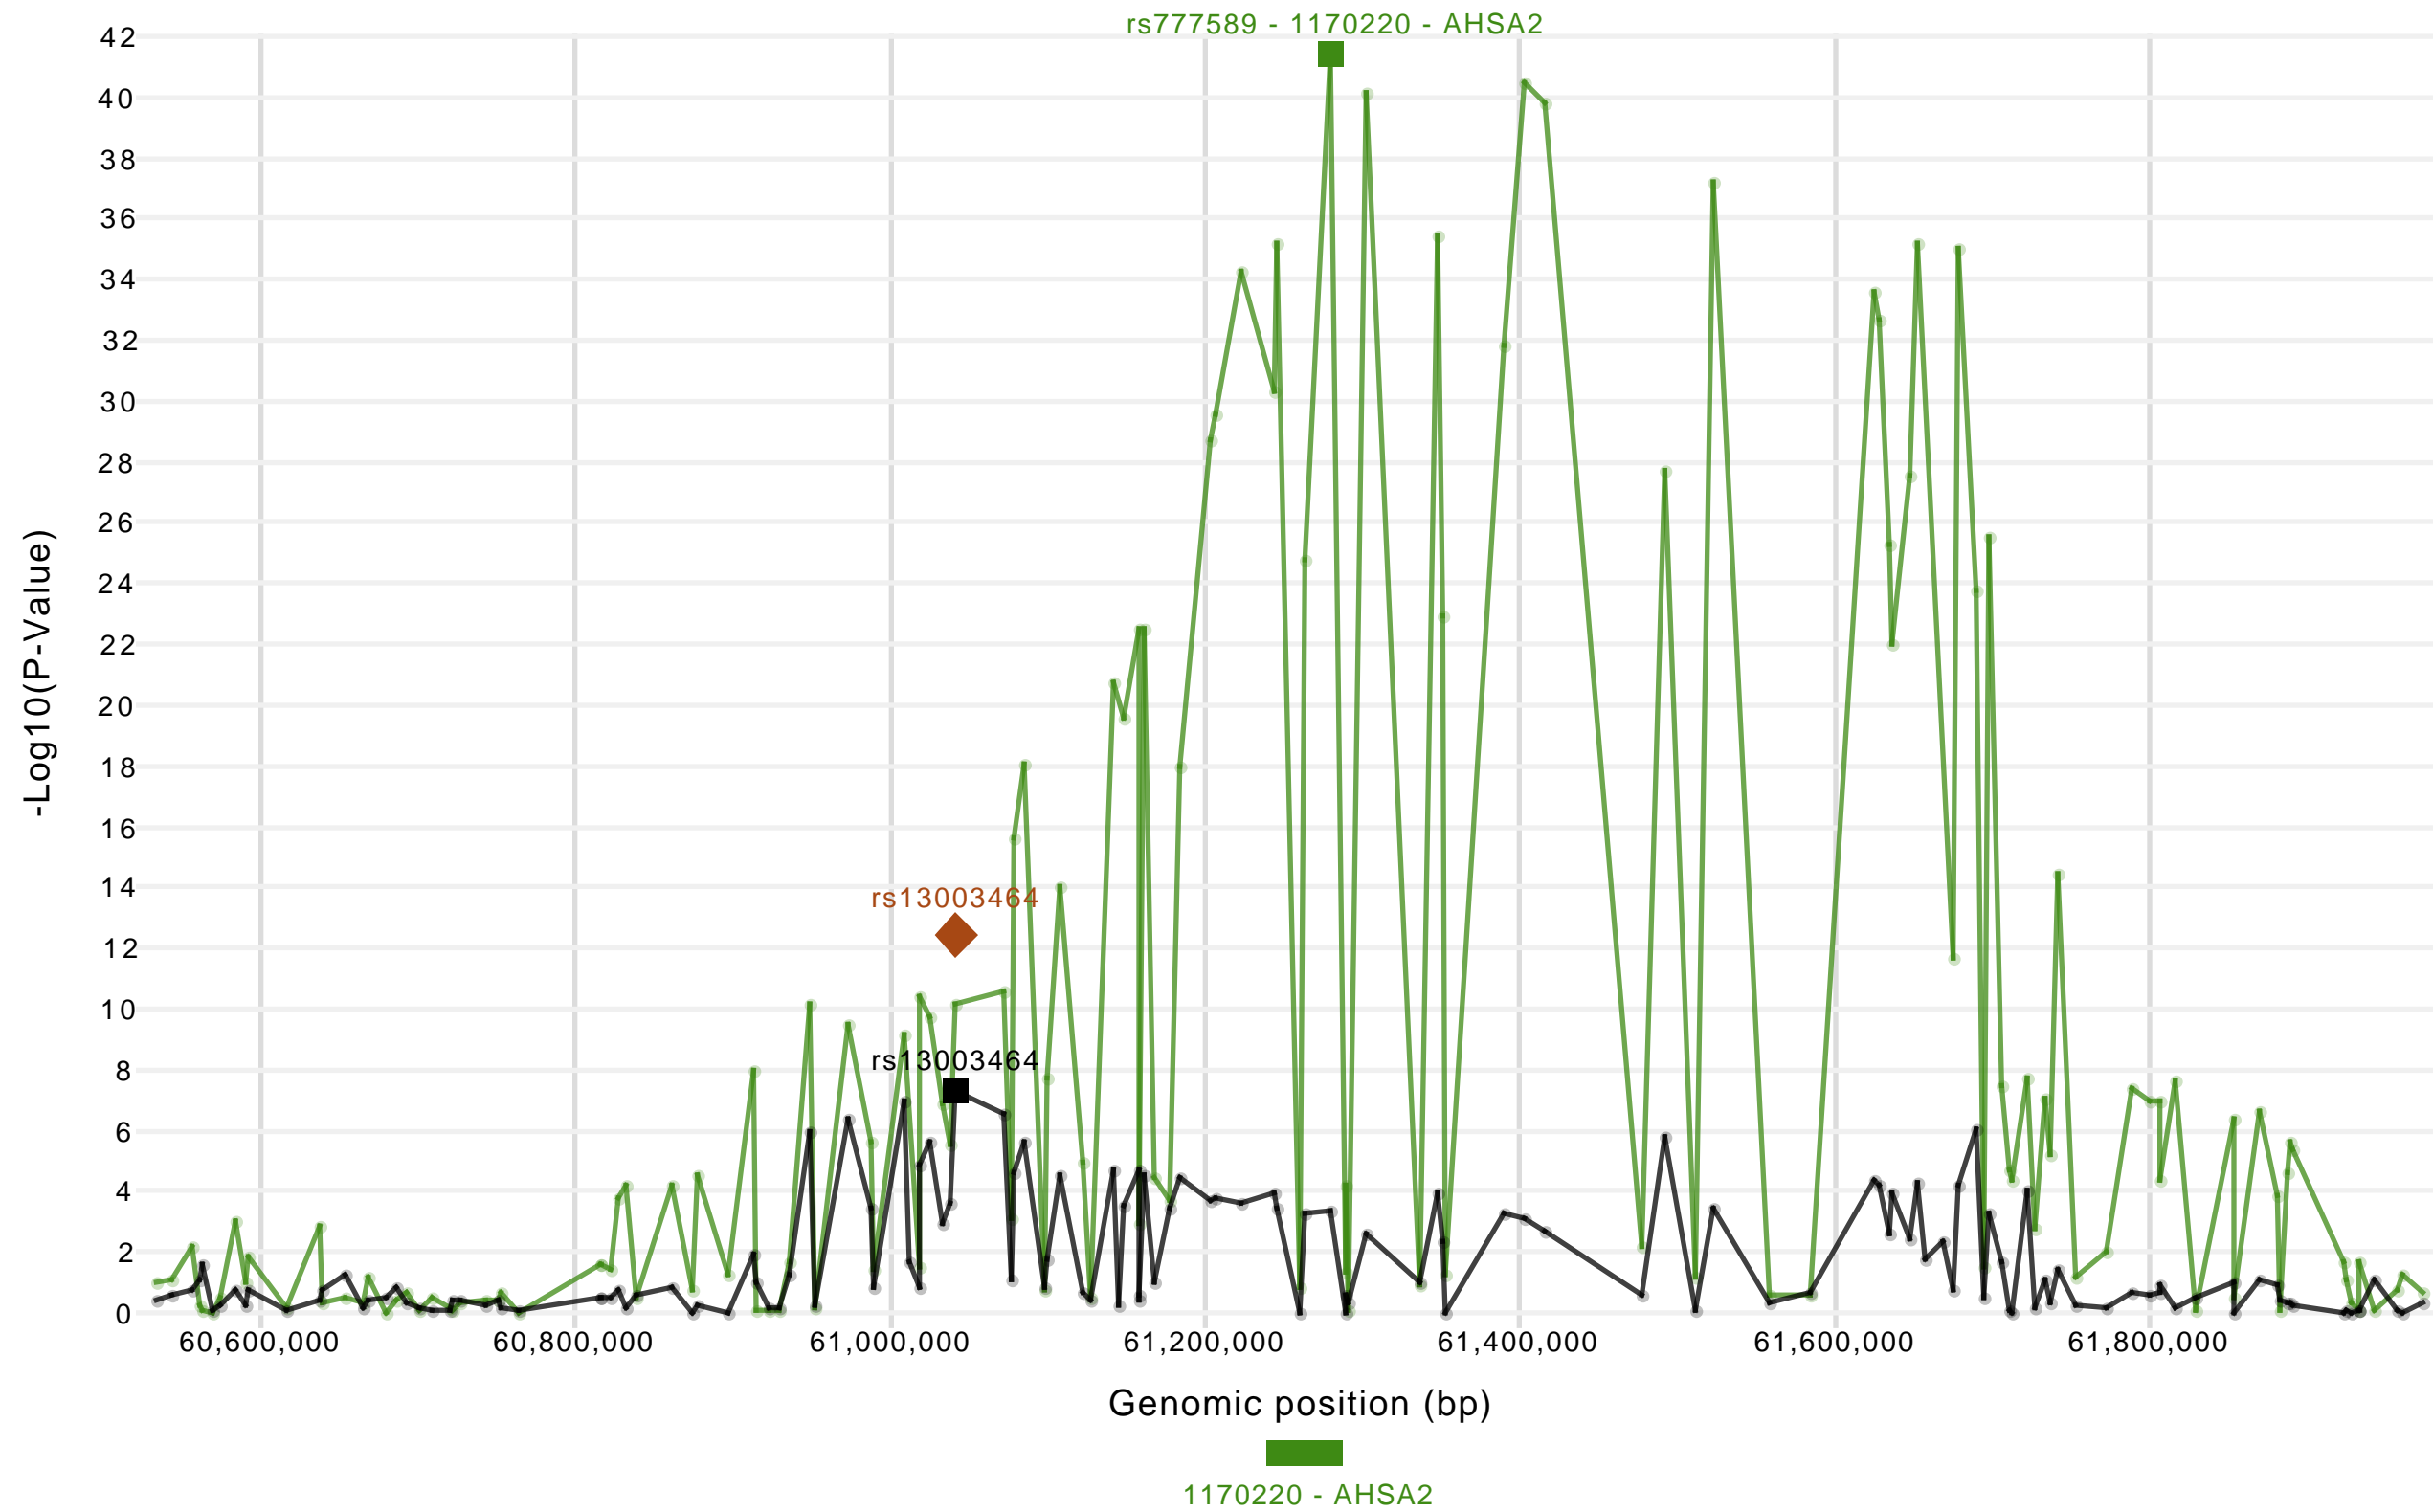

# Chromosome 2

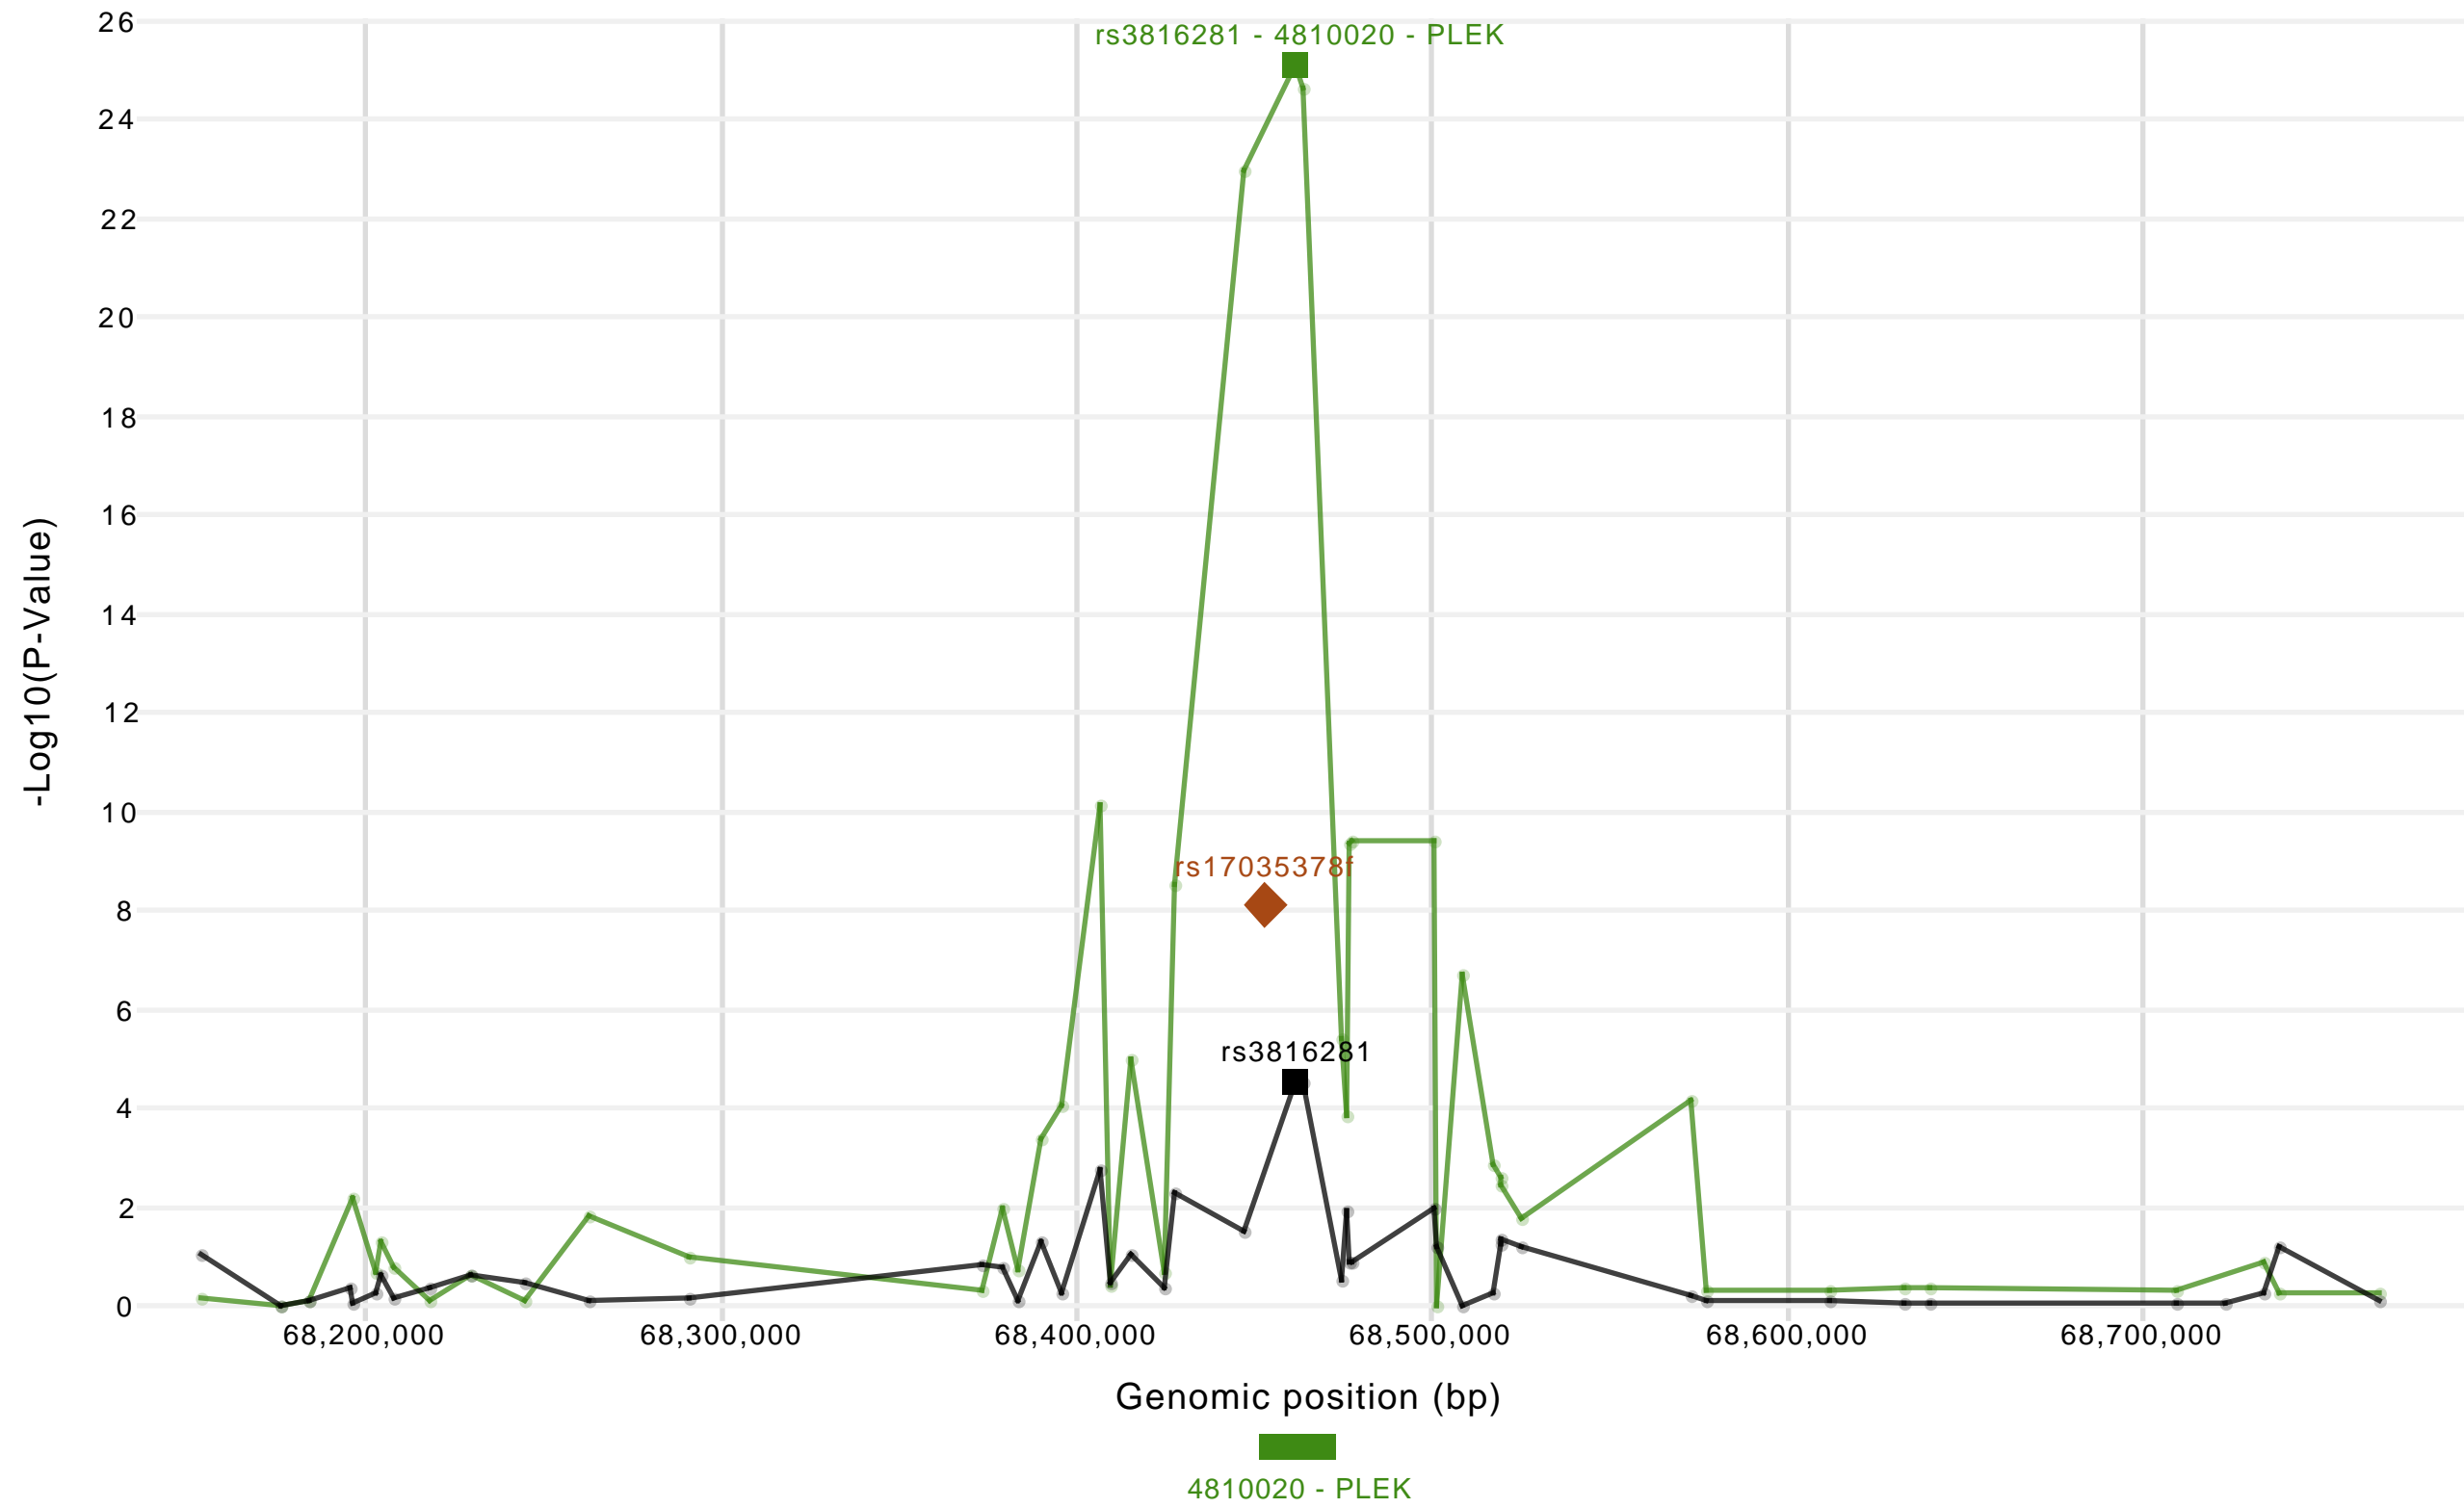

# Chromosome 2

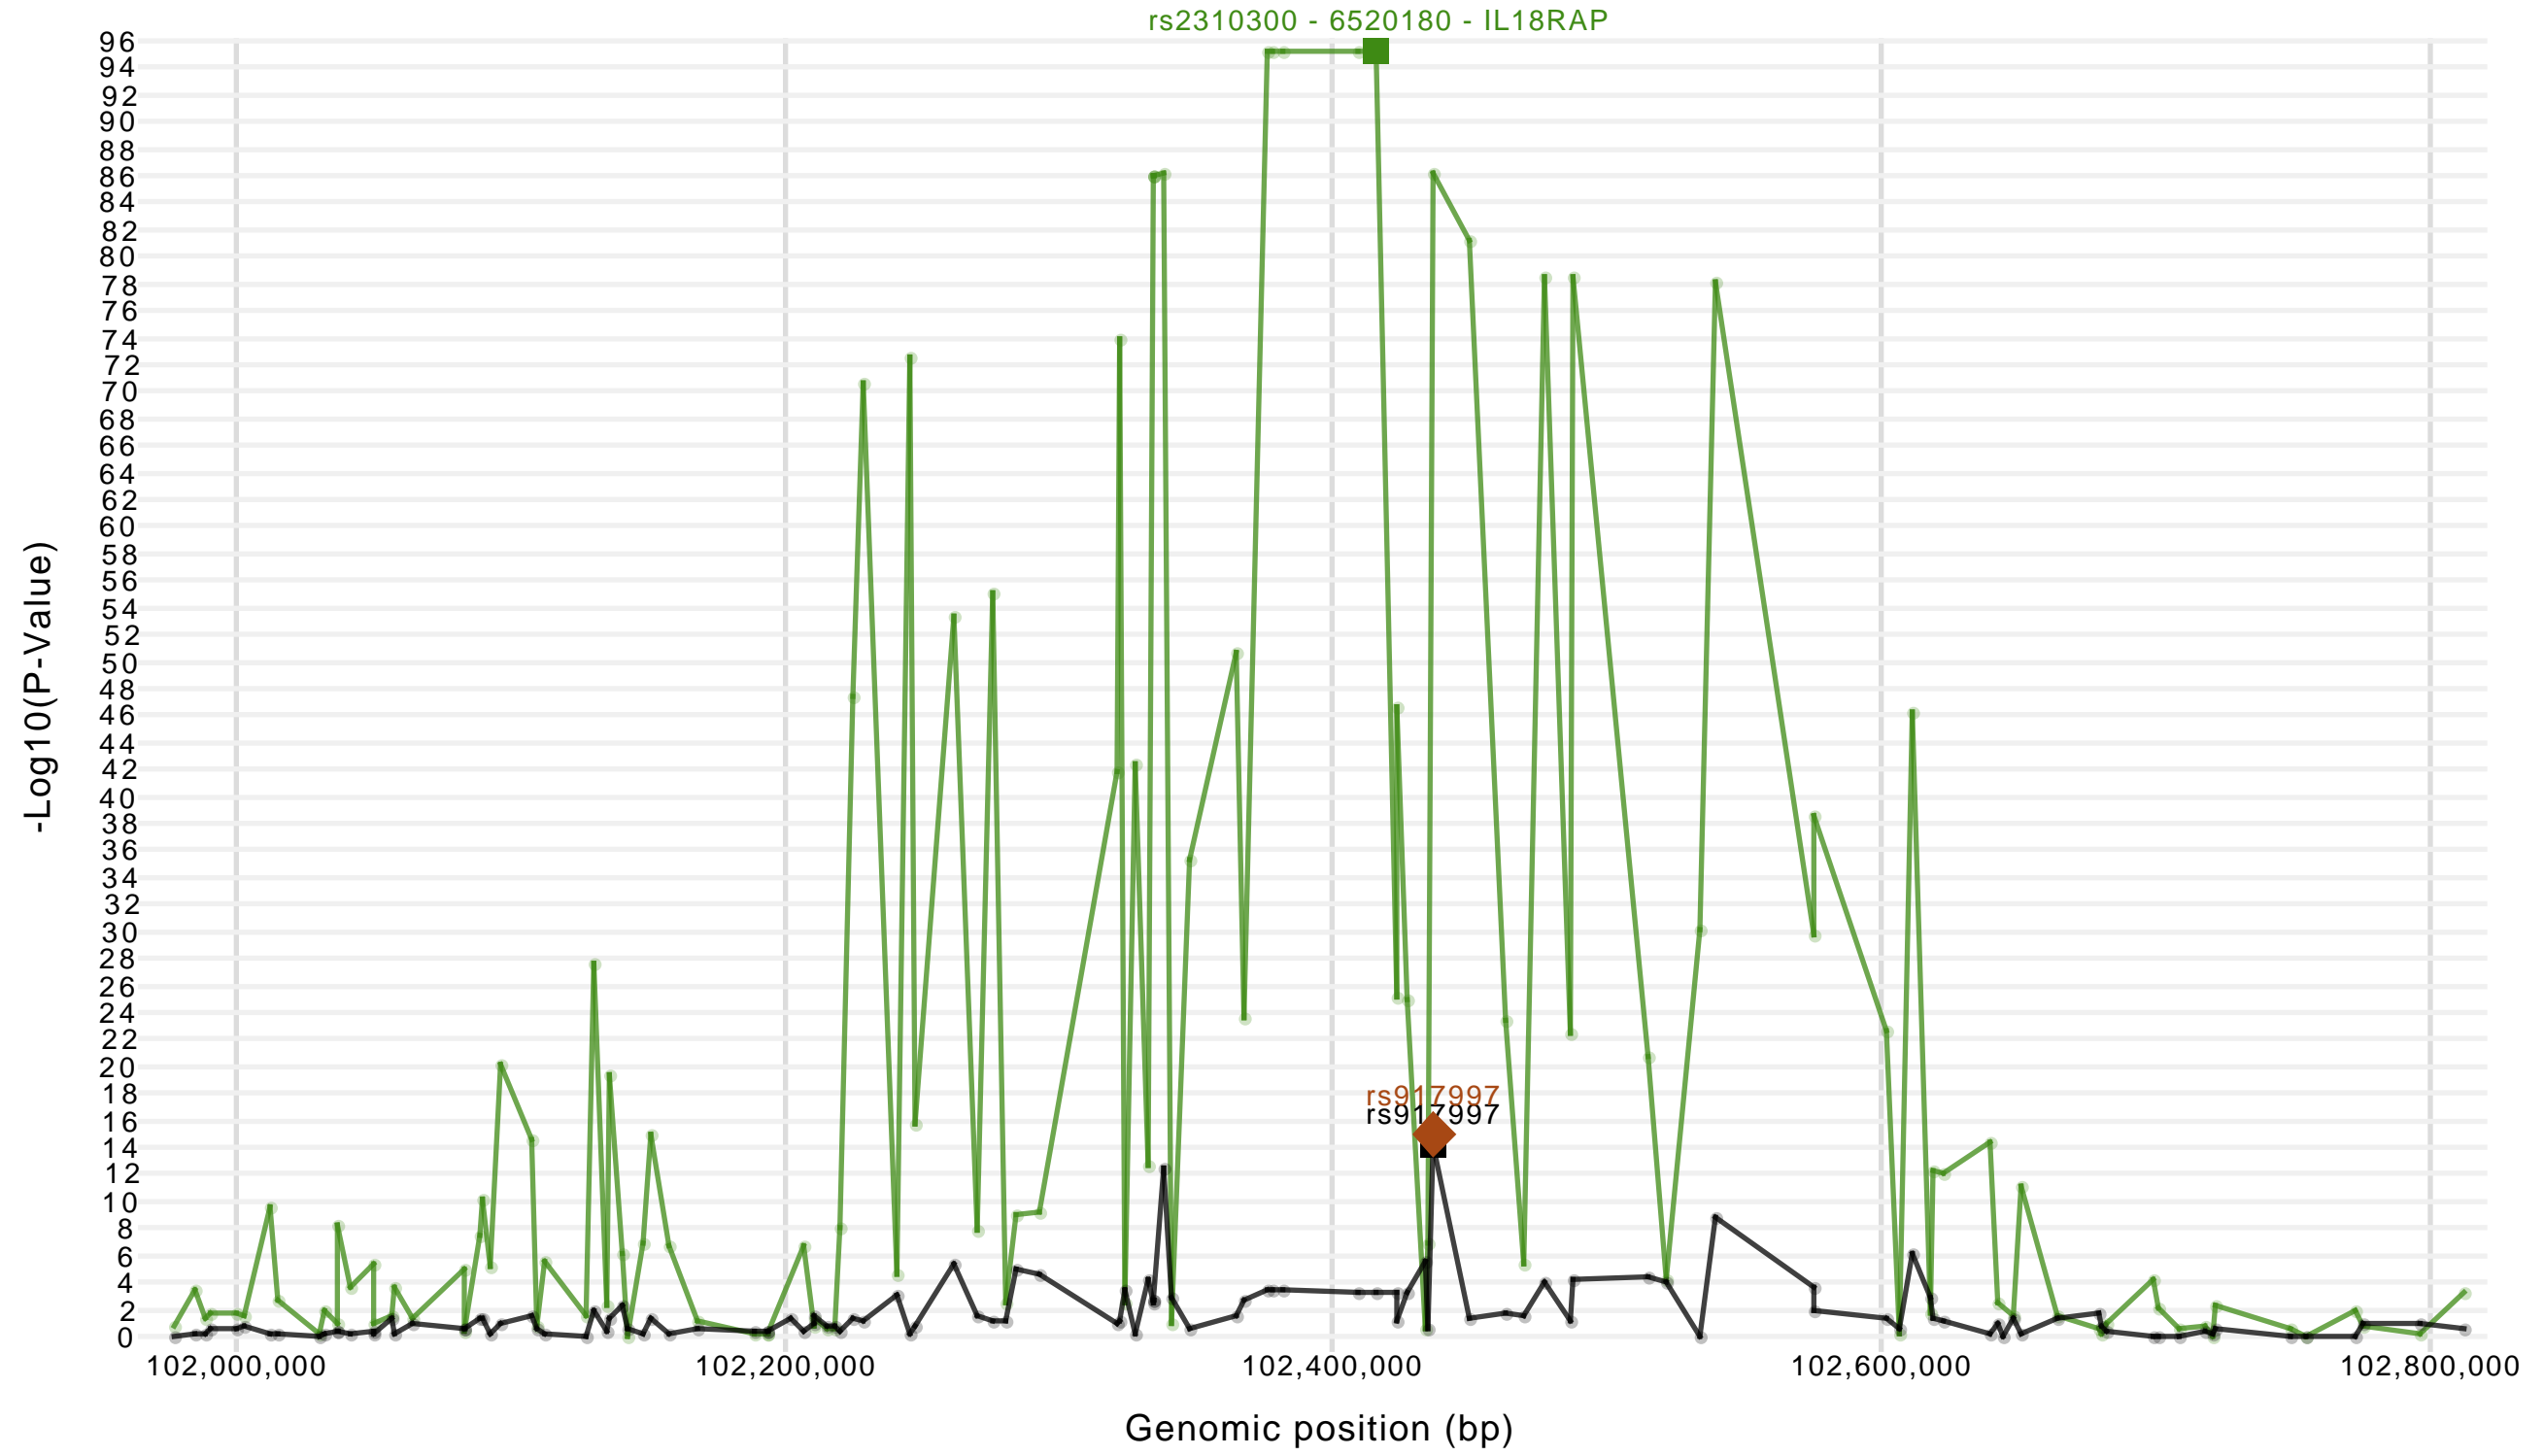

Chromosome 2

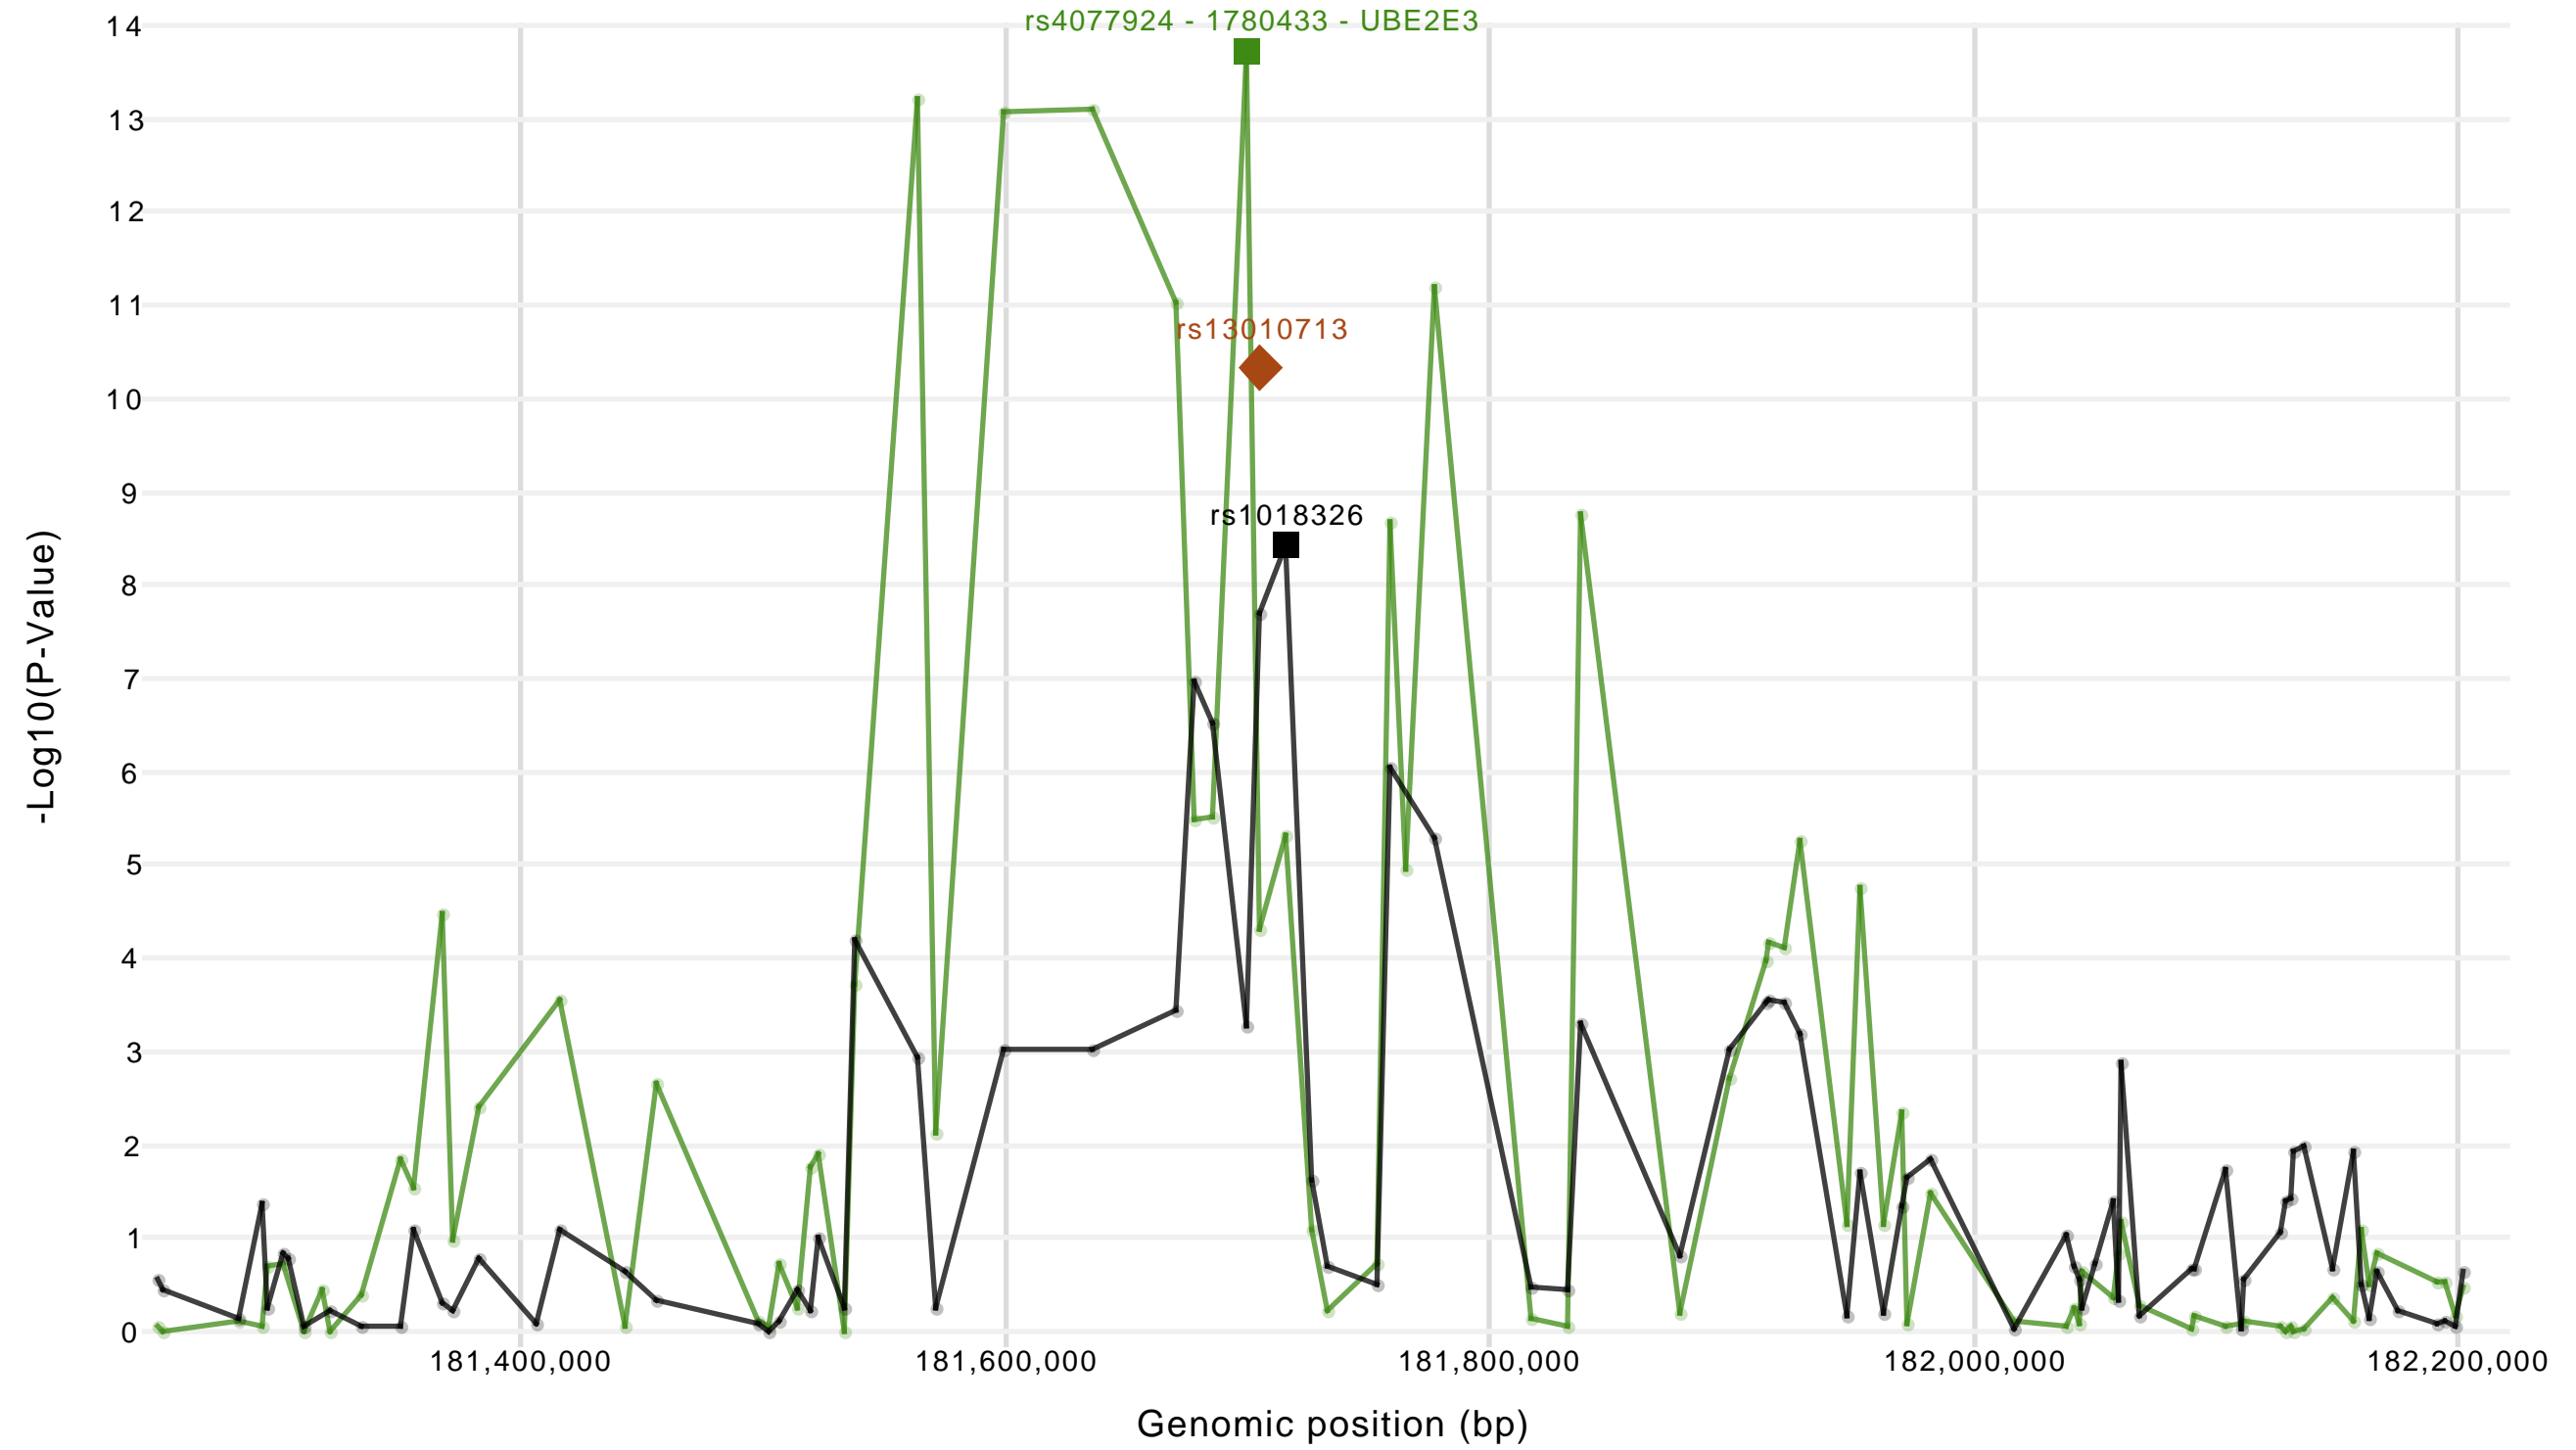

# Chromosome 3

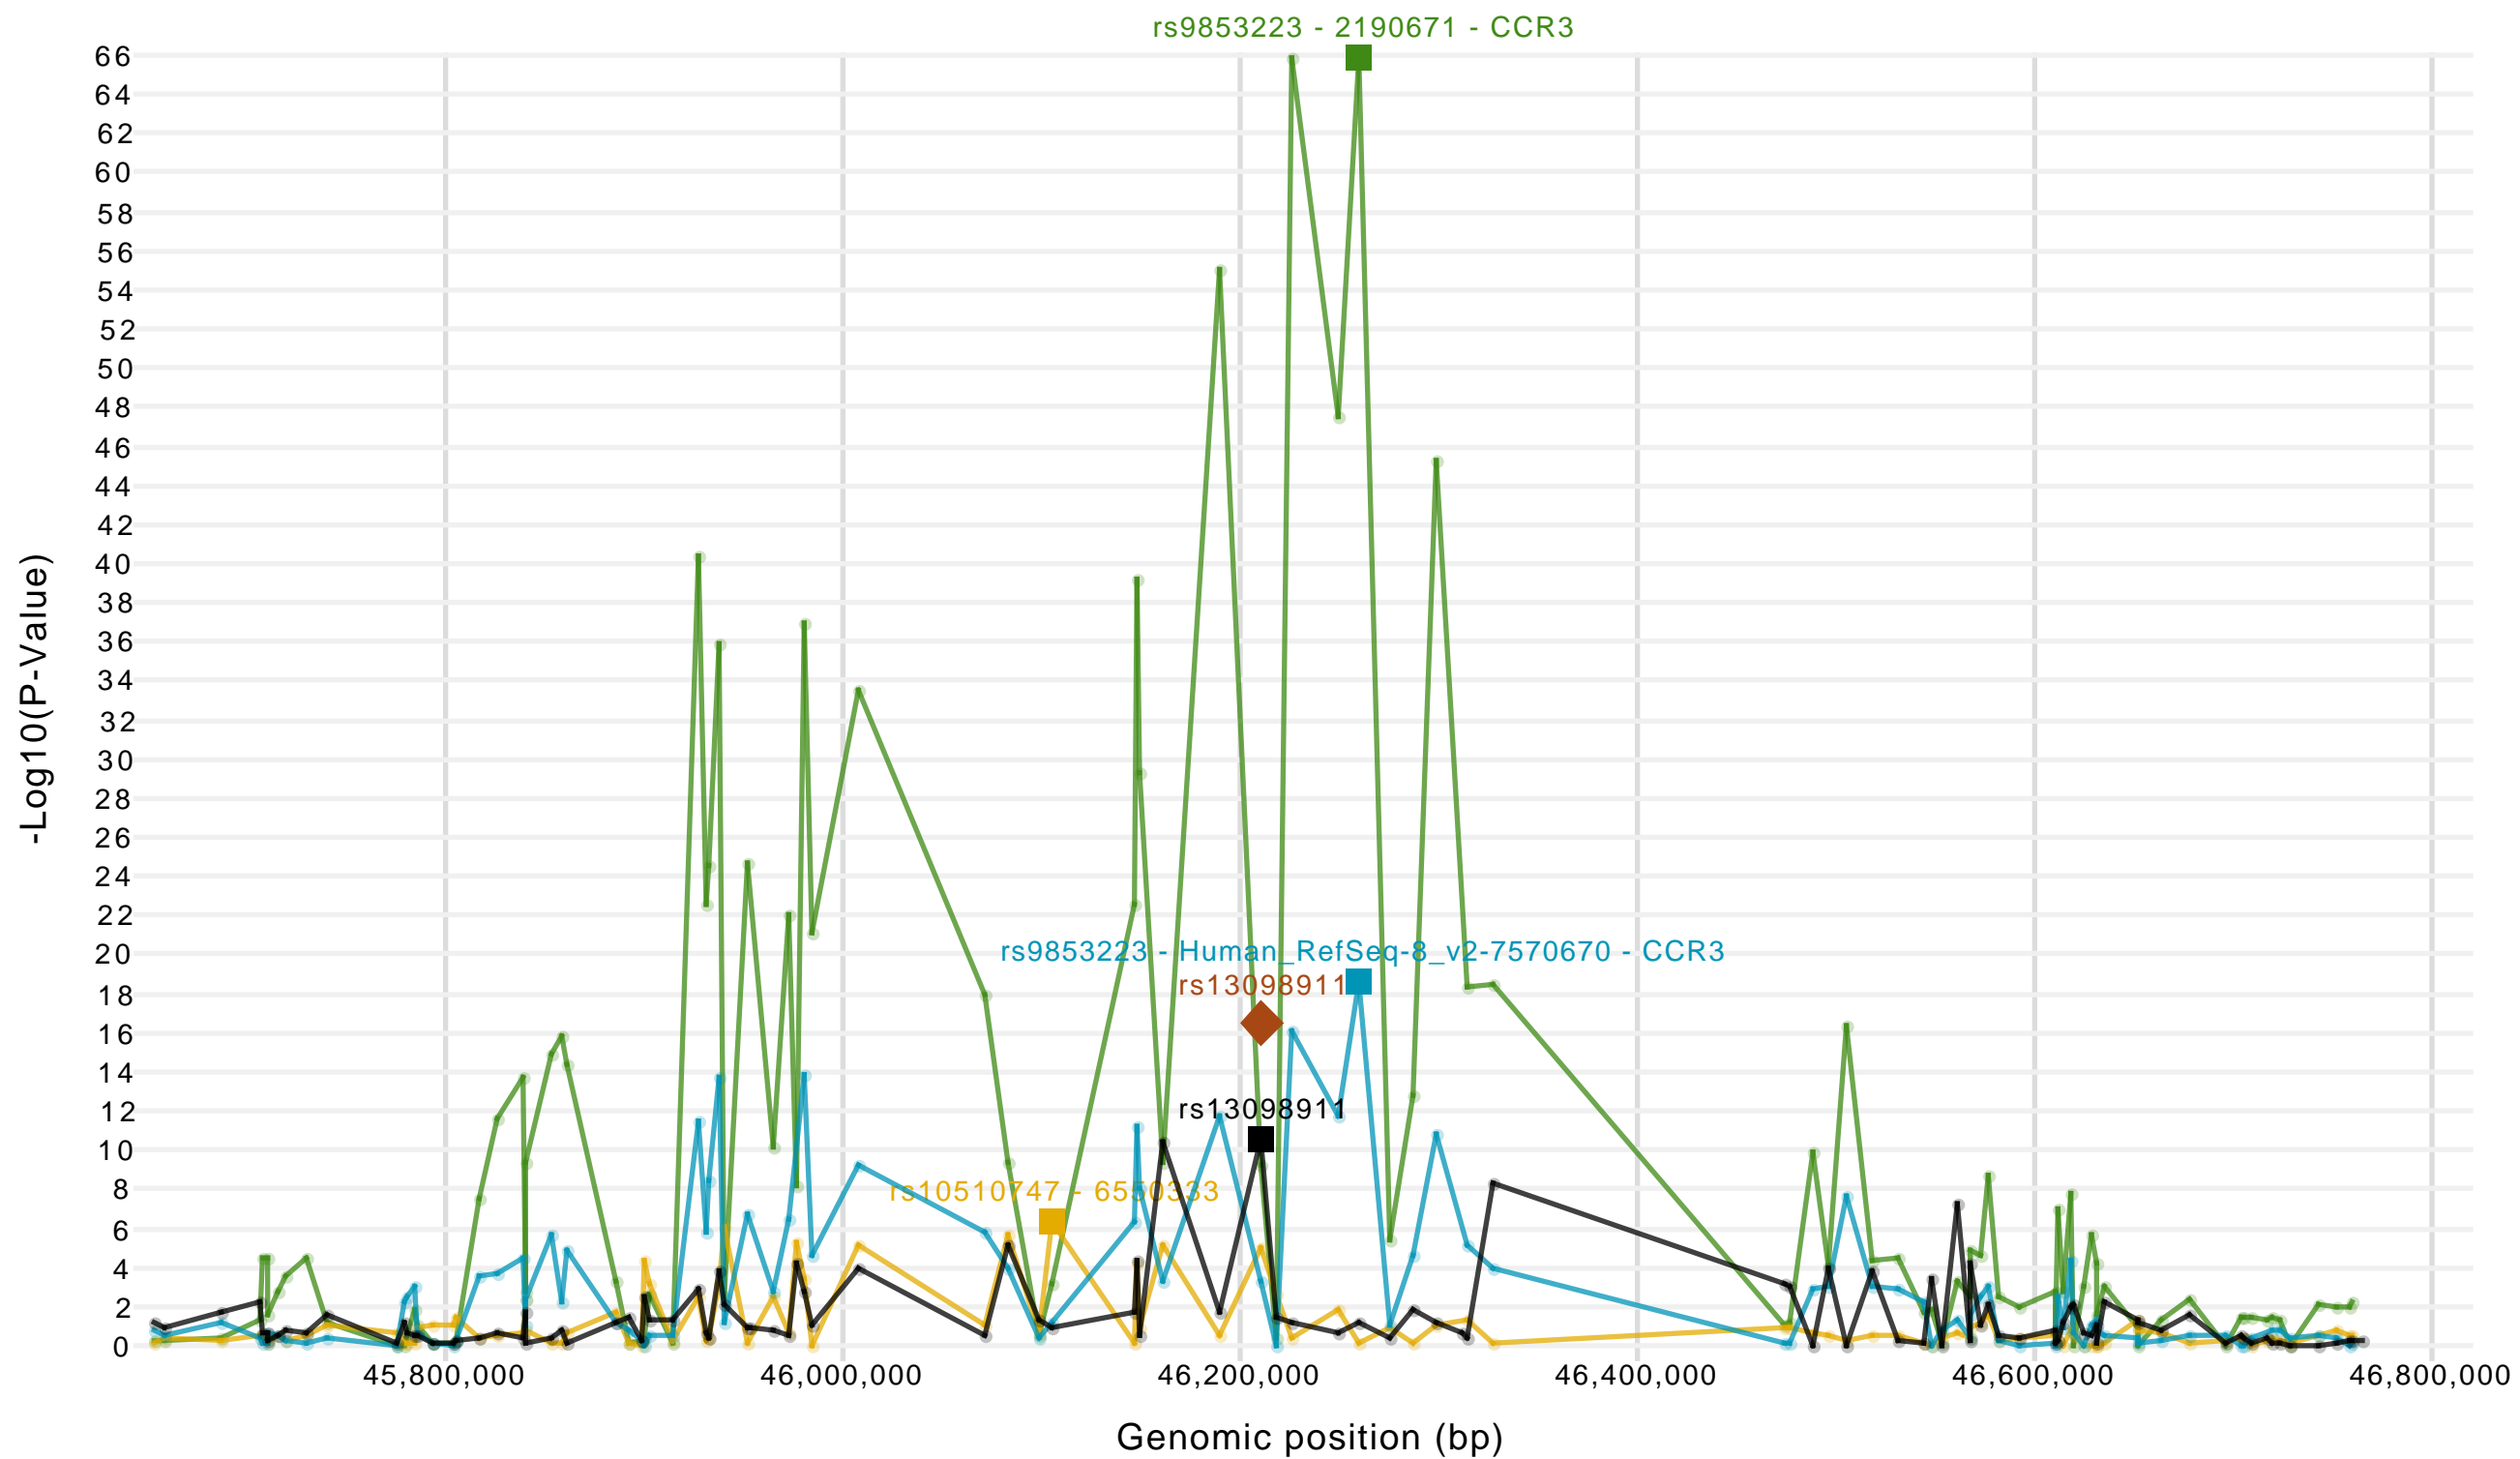

6550333

2190671 - CCR3

Human\_RefSeq-8\_v2-7570670 - CCR3

# Chromosome 3

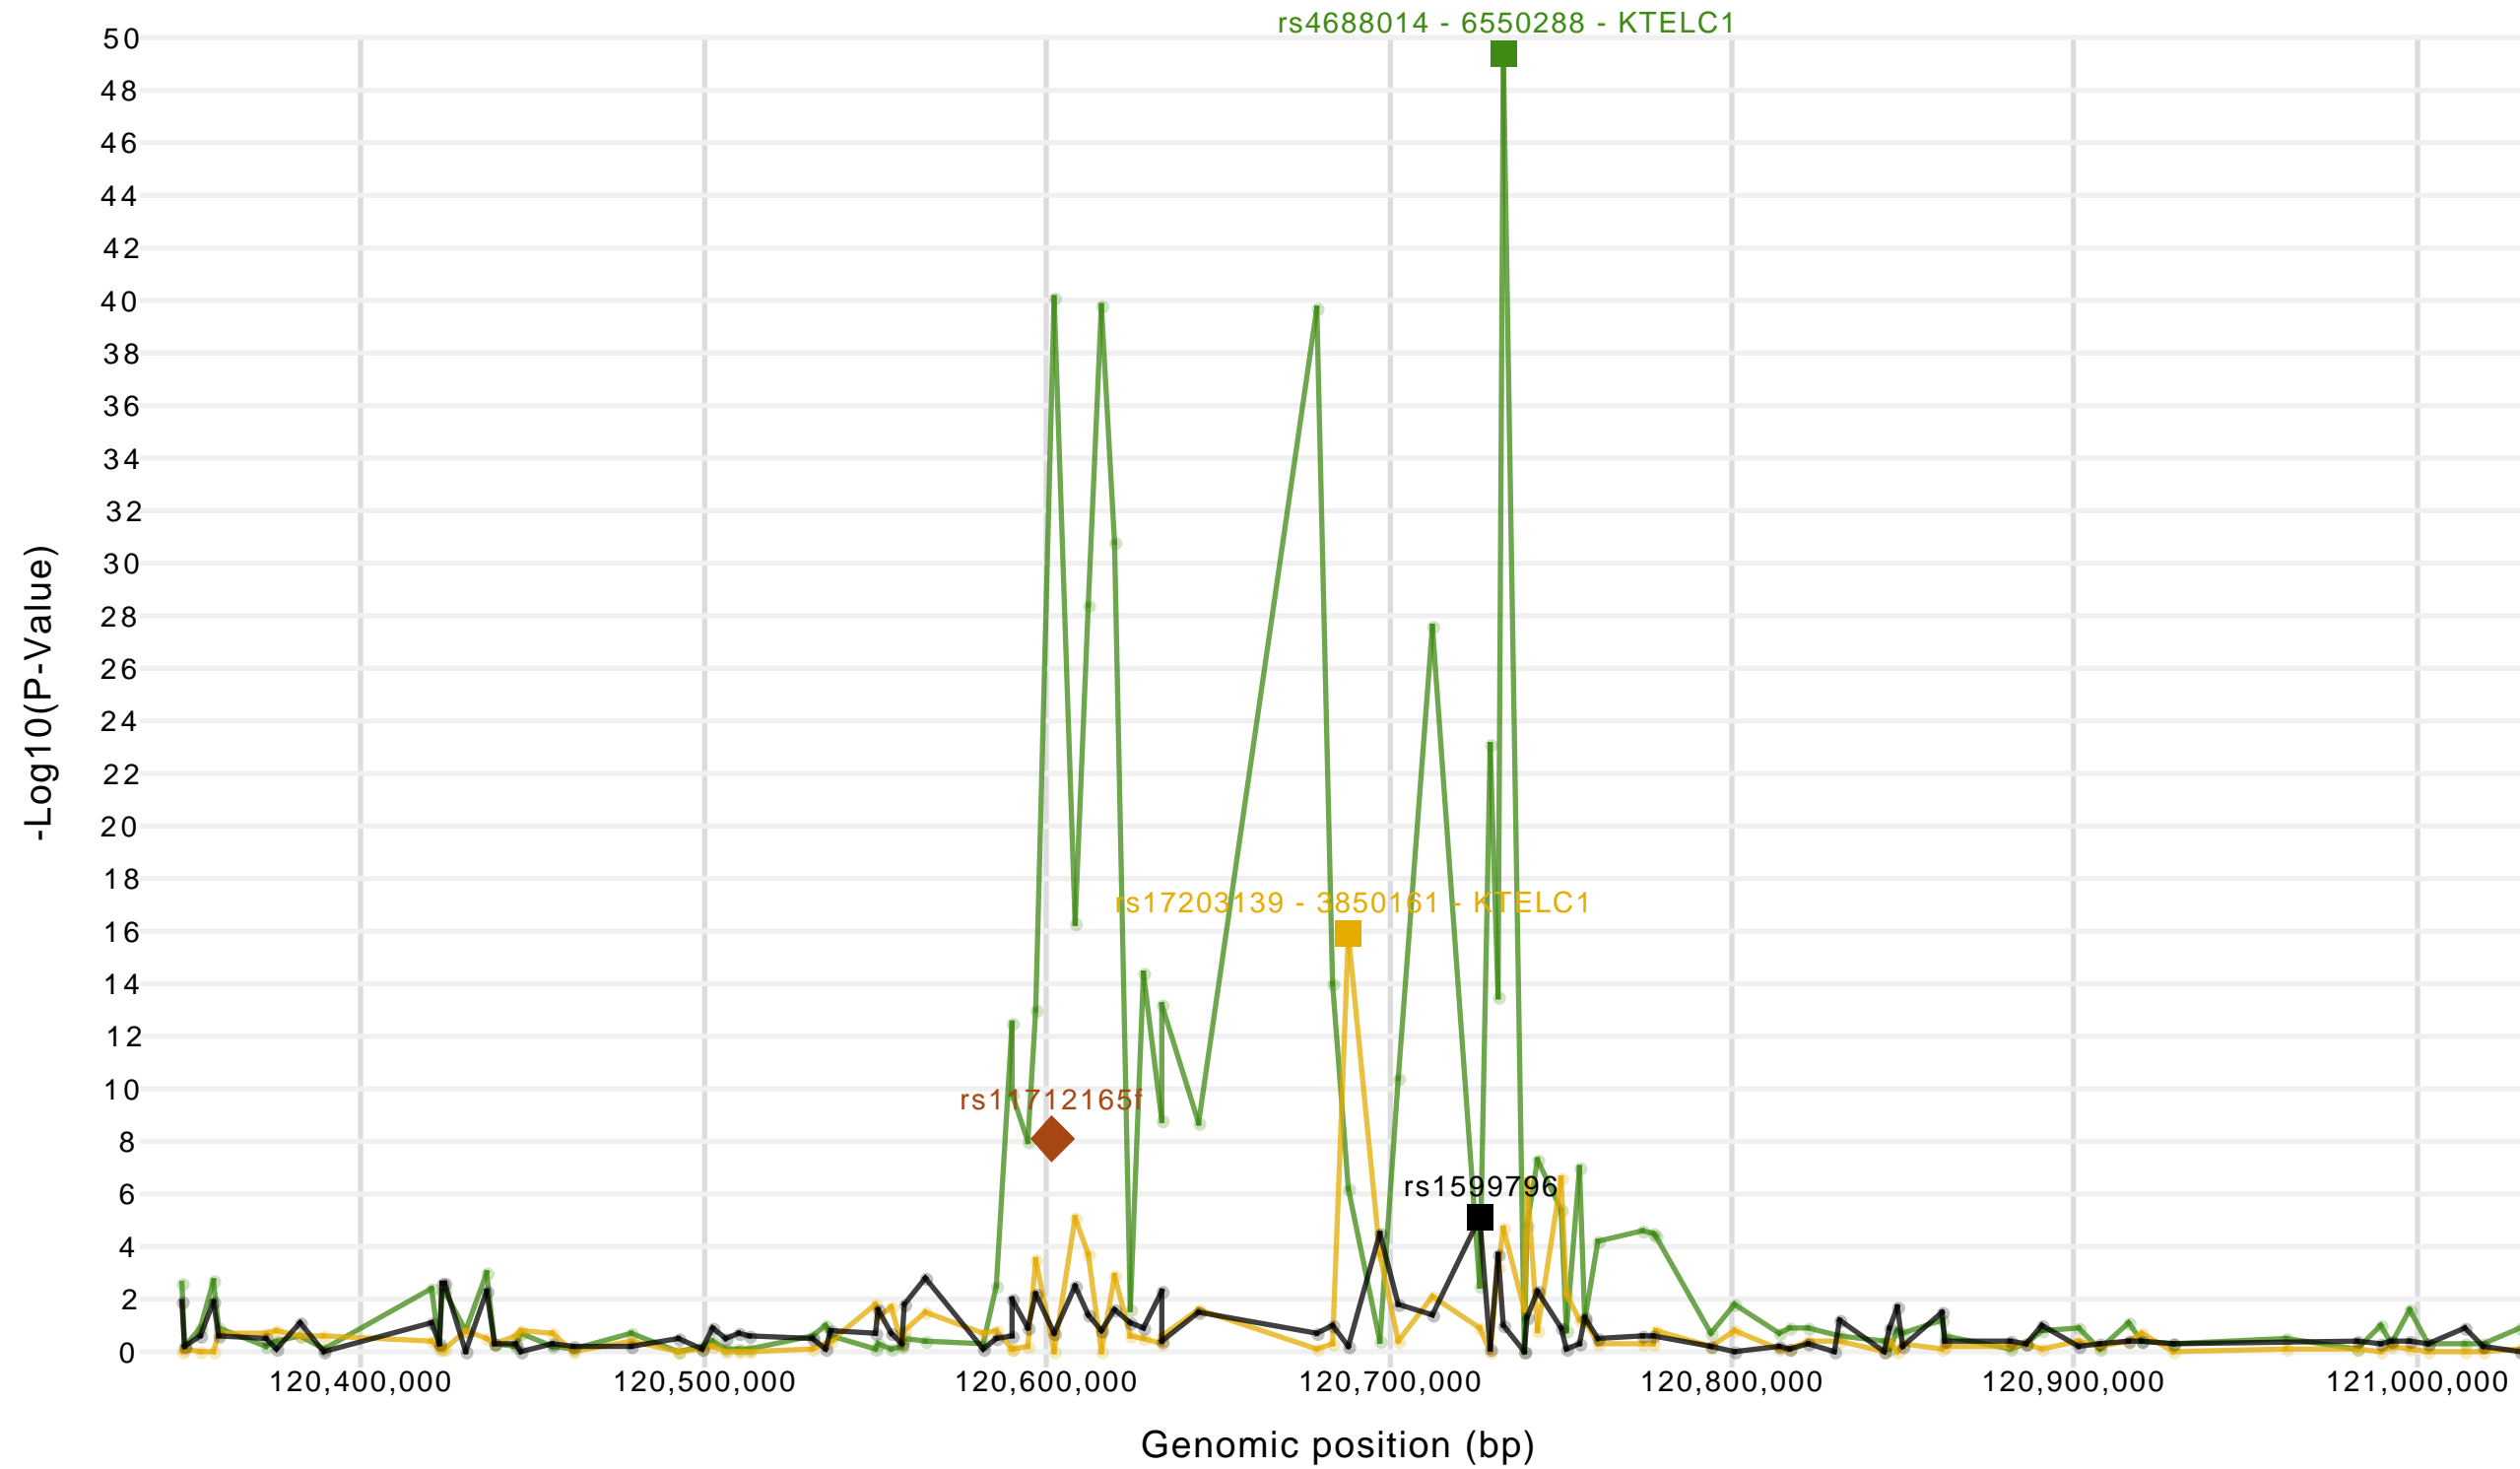

Genomic position (bp)

6550288 - KTELC1  
3850161 - KTELC1



# Chromosome 6

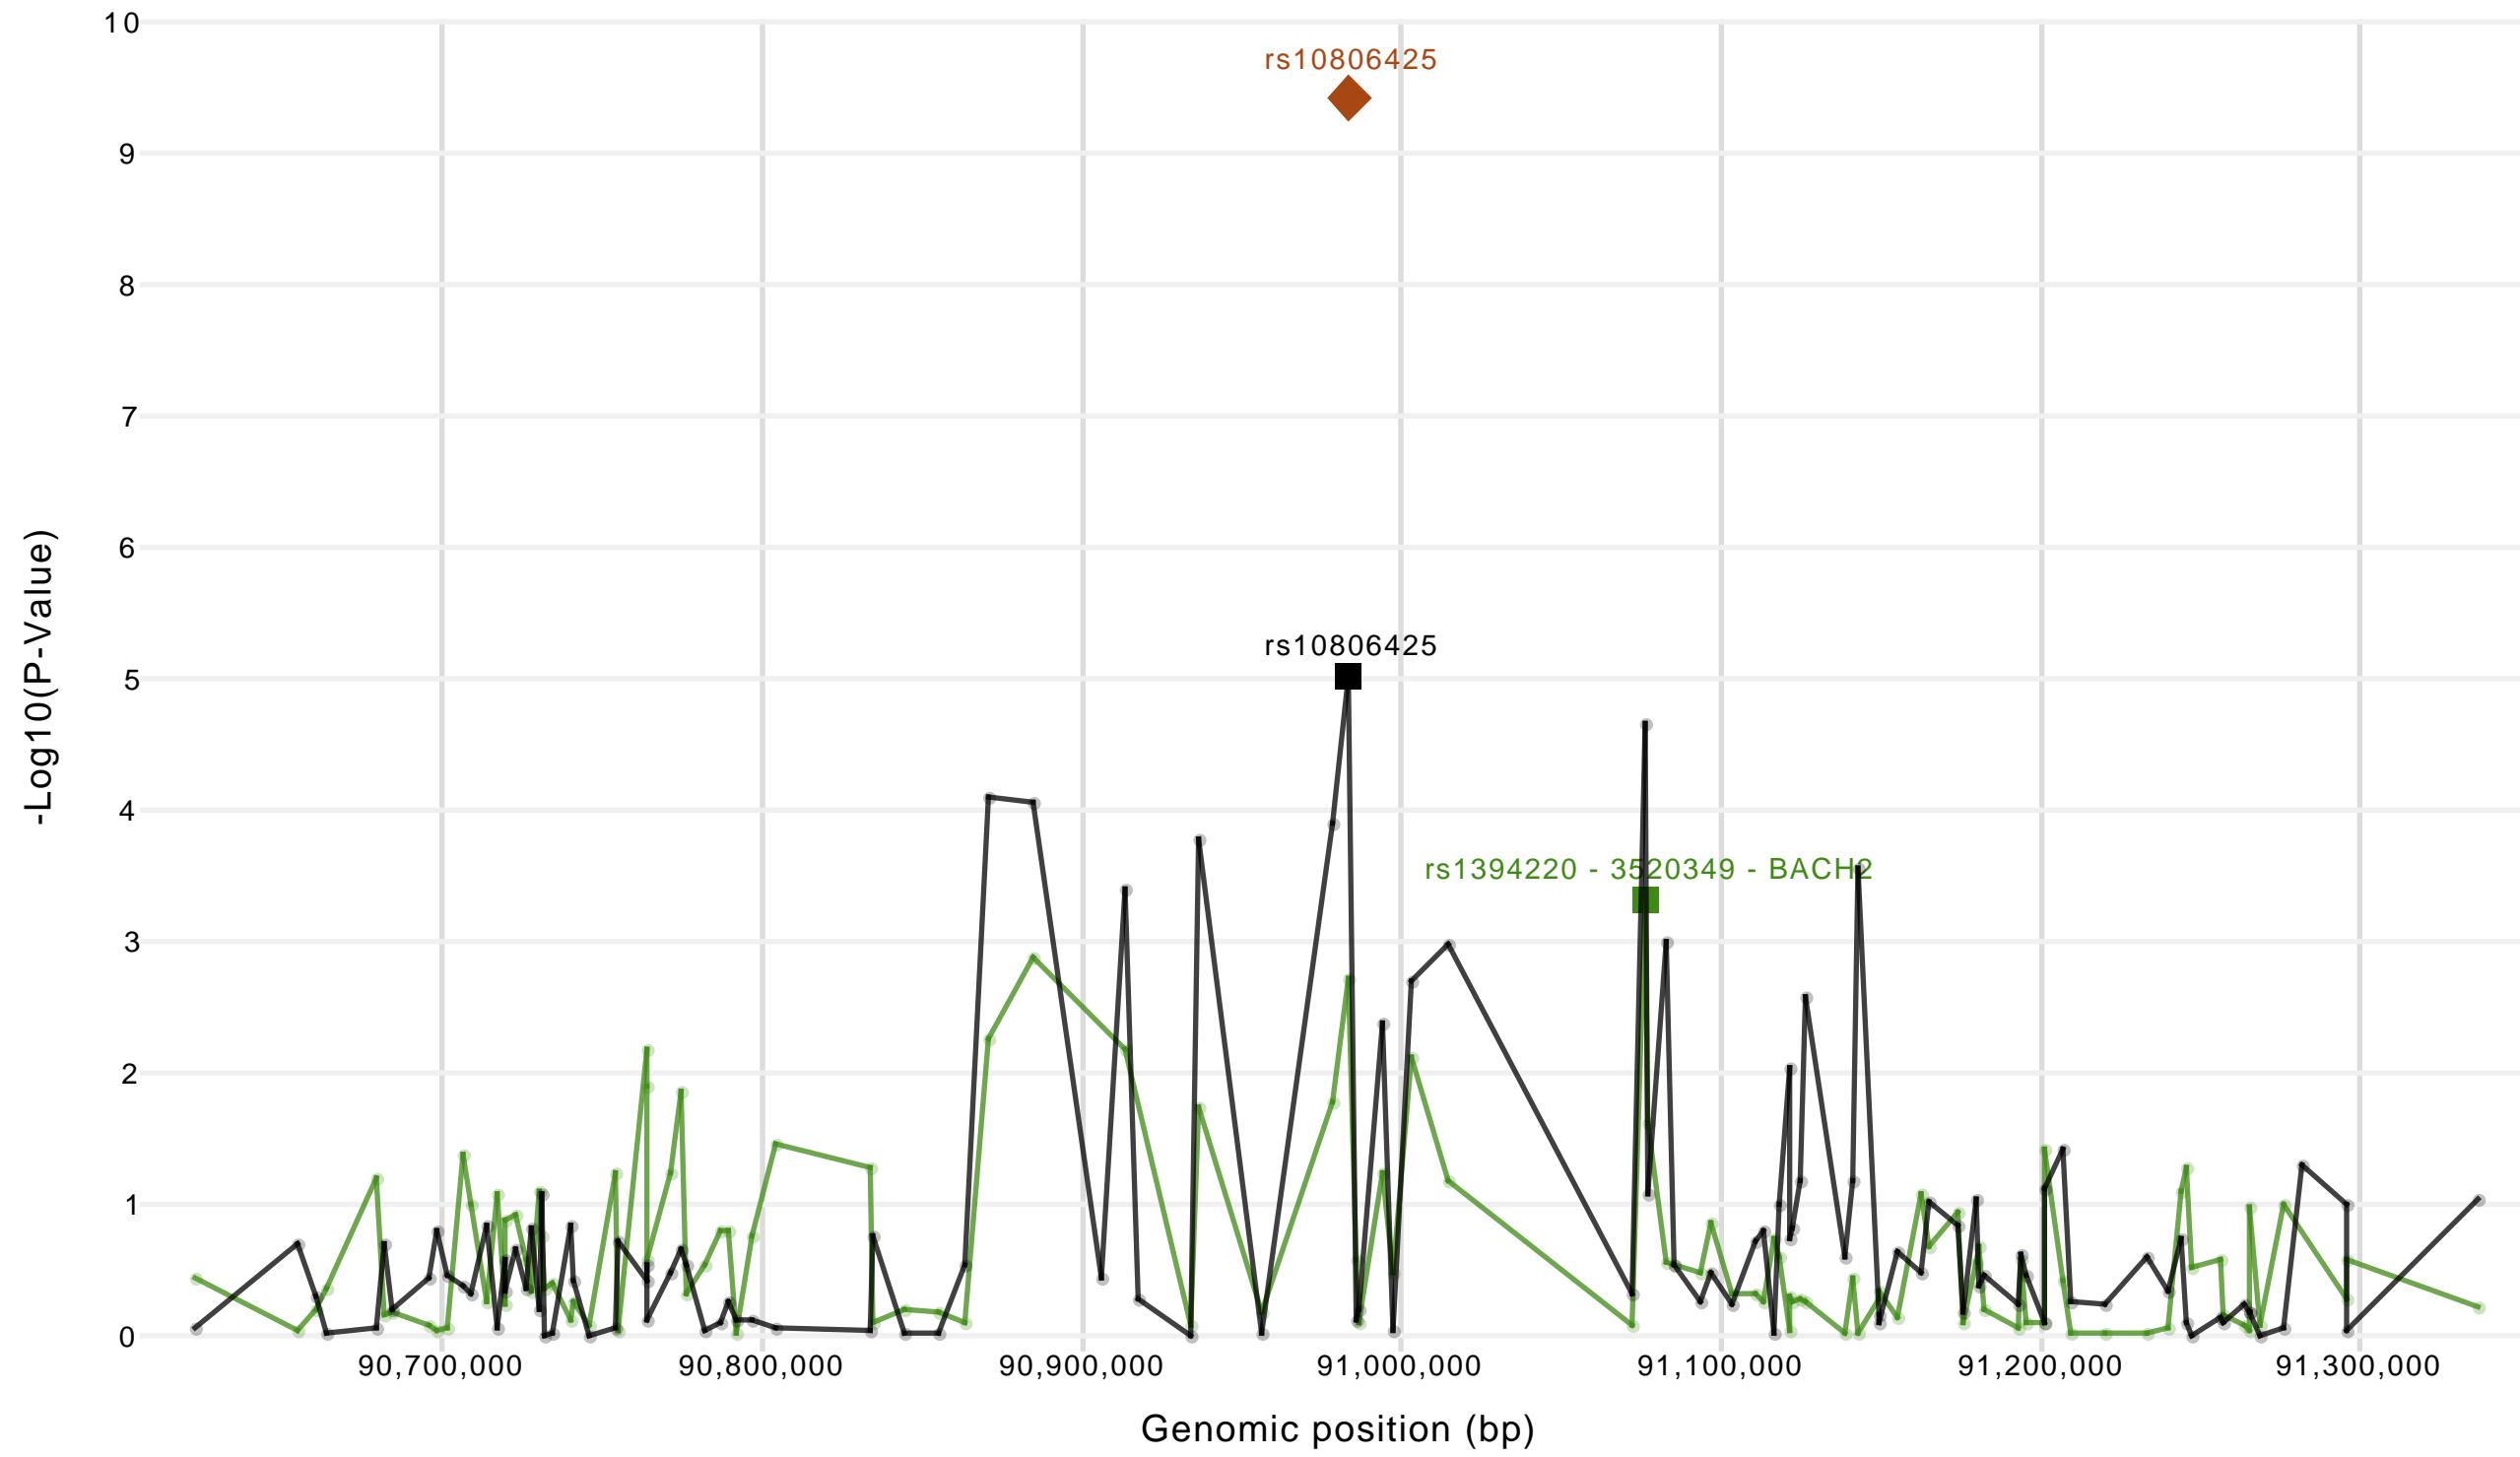

3520349 - BACH2

# Chromosome 6

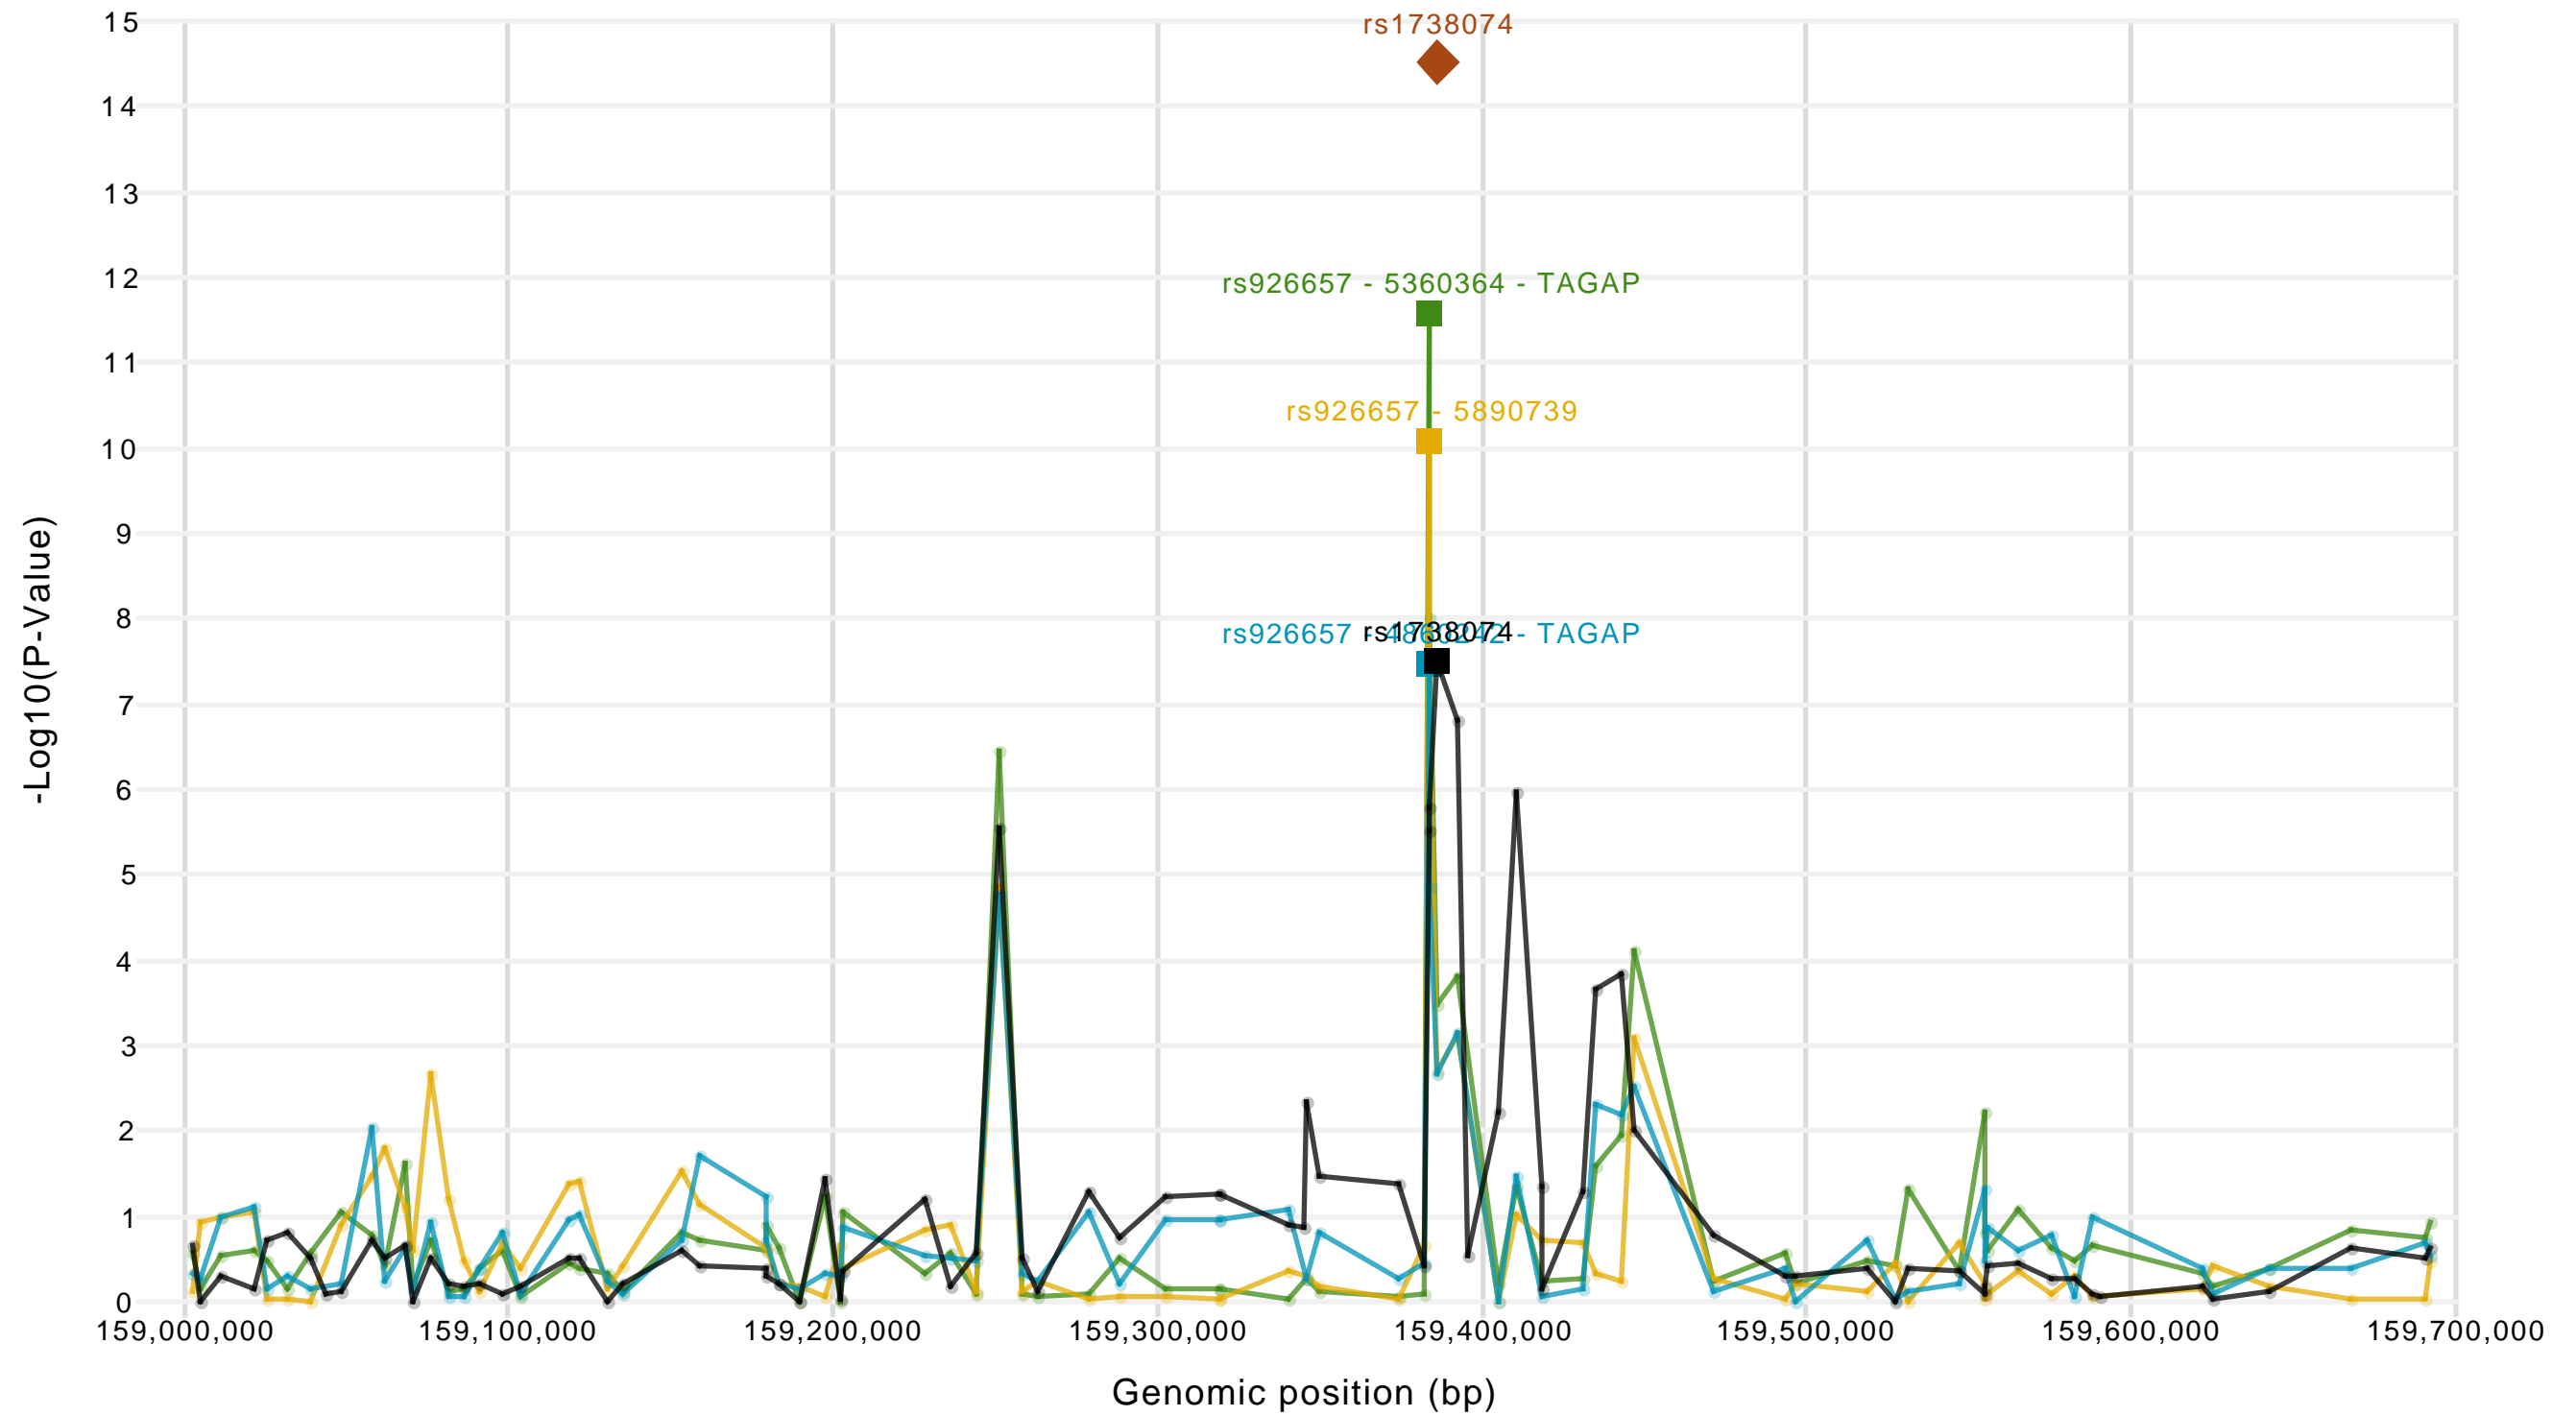

■  
5360364 - TAGAP  
■  
5890739  
■  
4860242 - TAGAP

# Chromosome 7

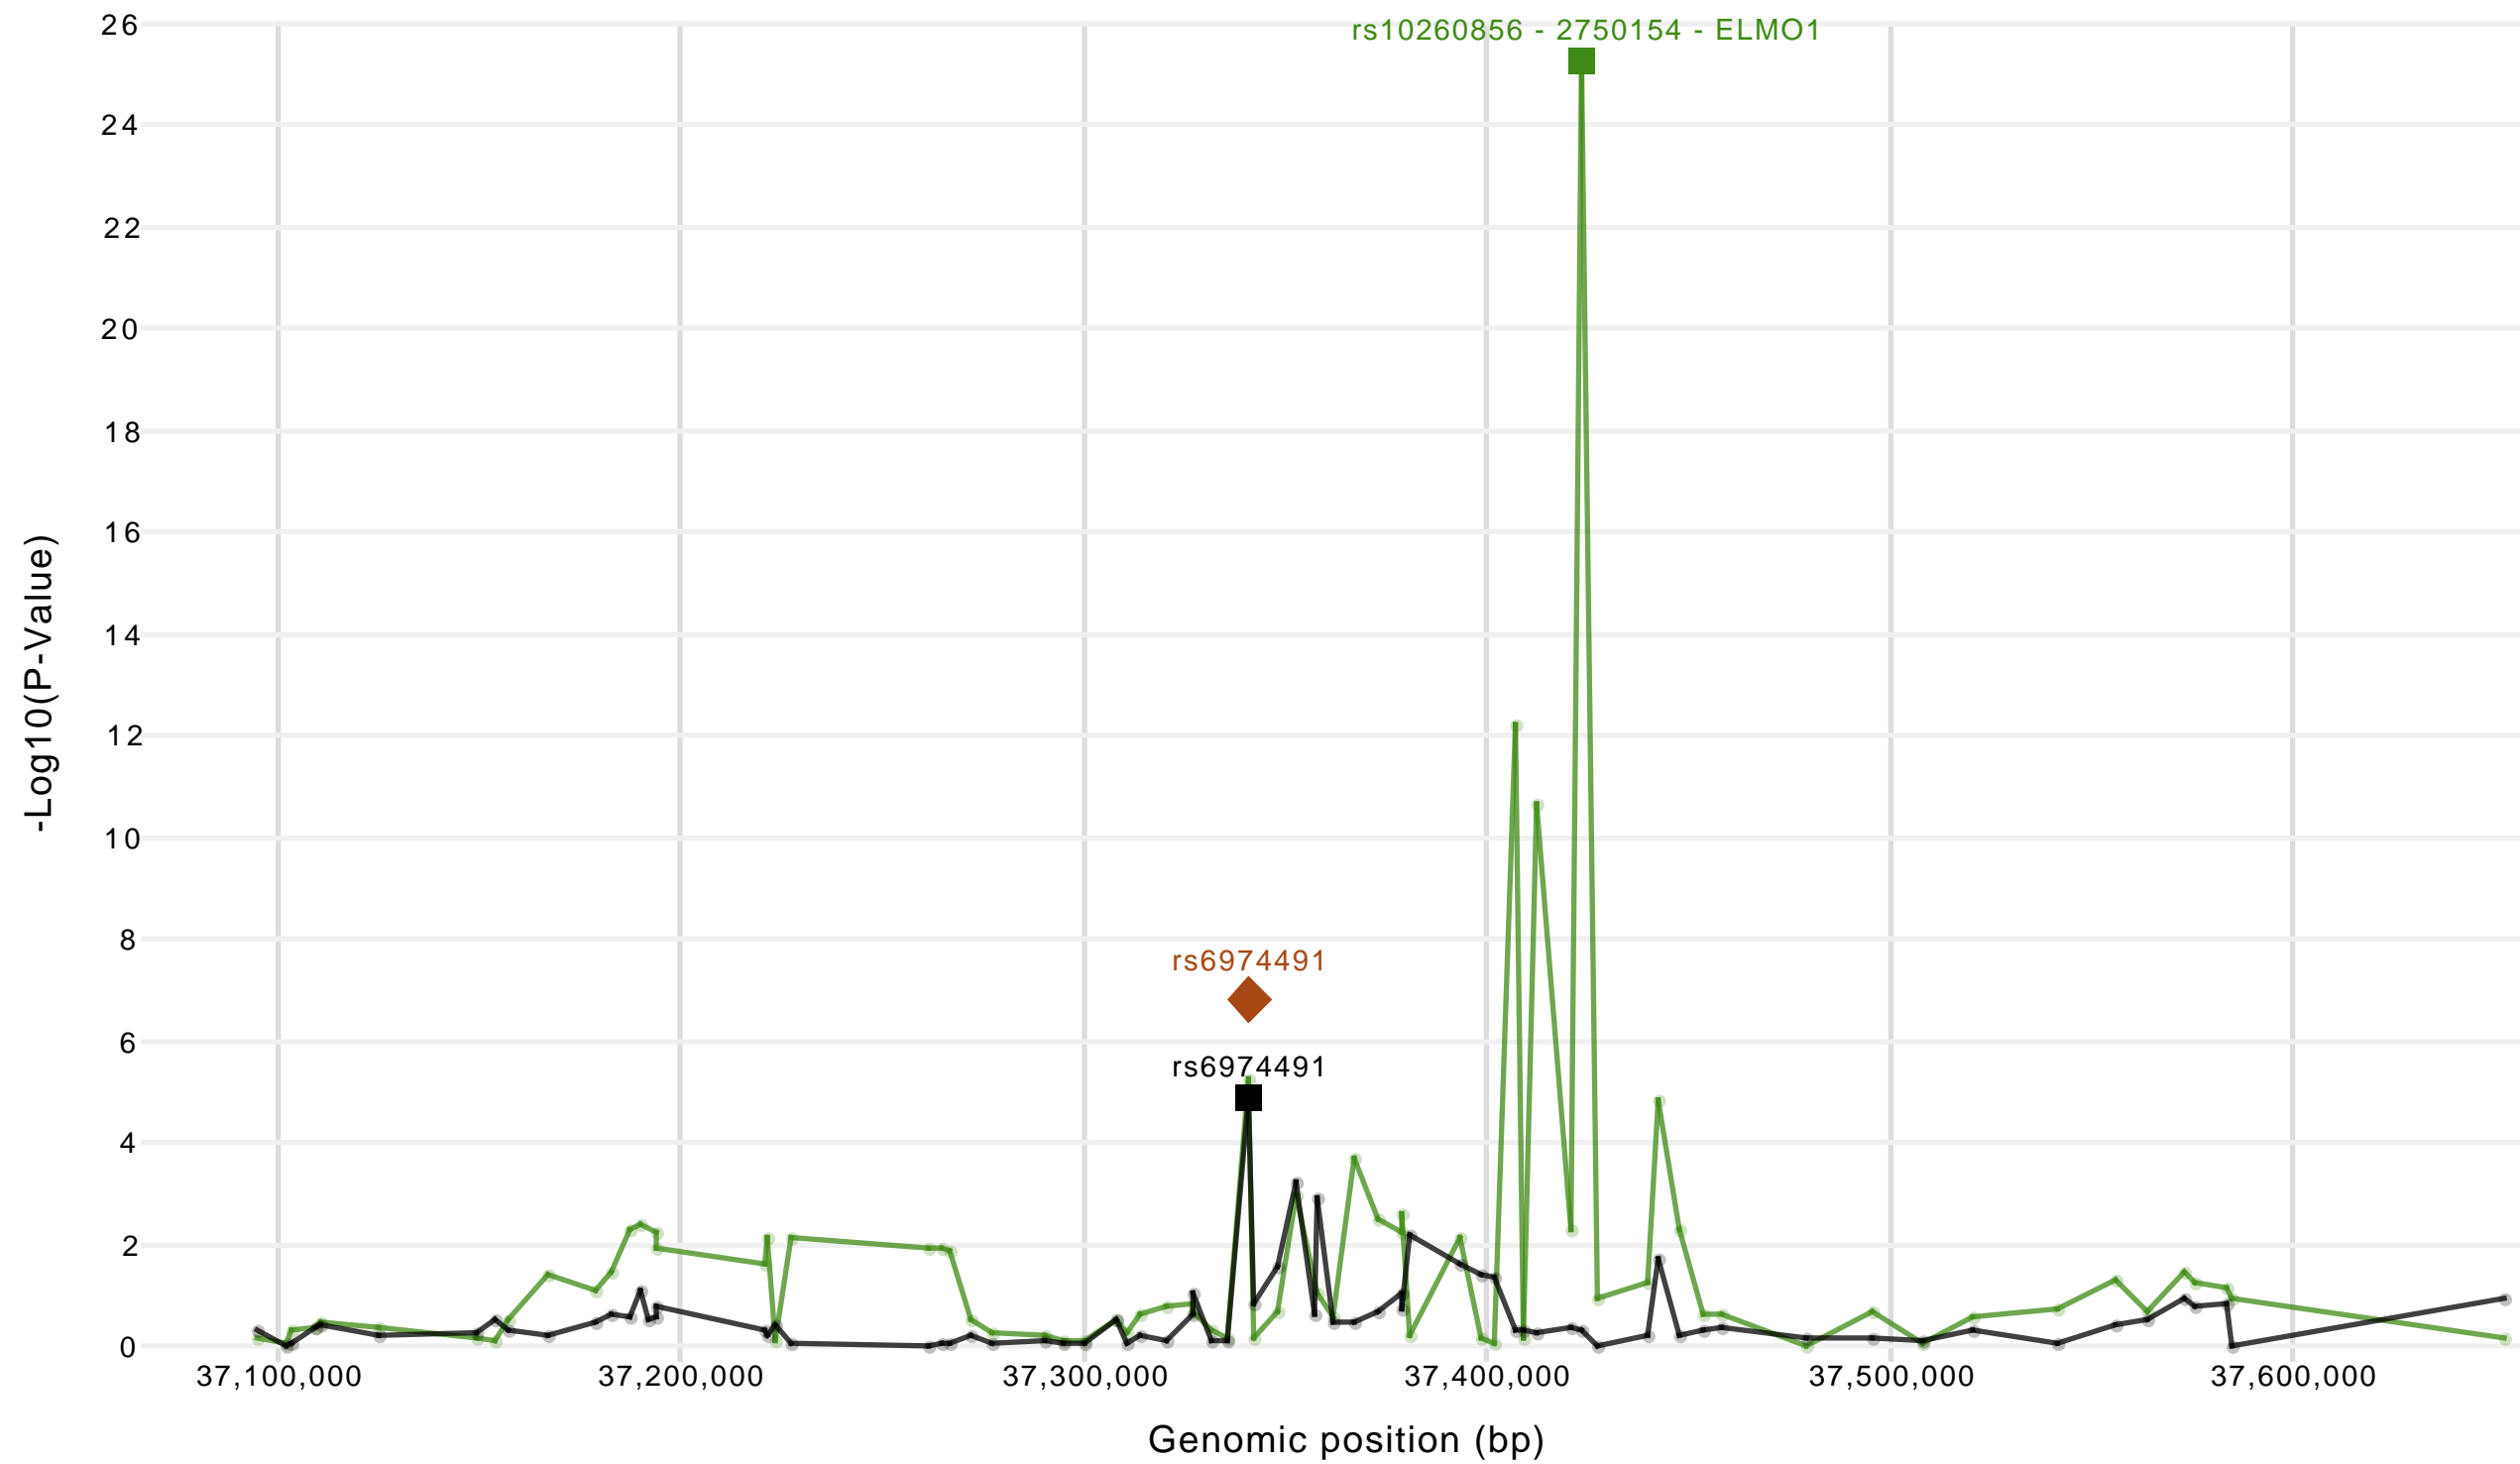

2750154 - ELMO1



Chromosome 12

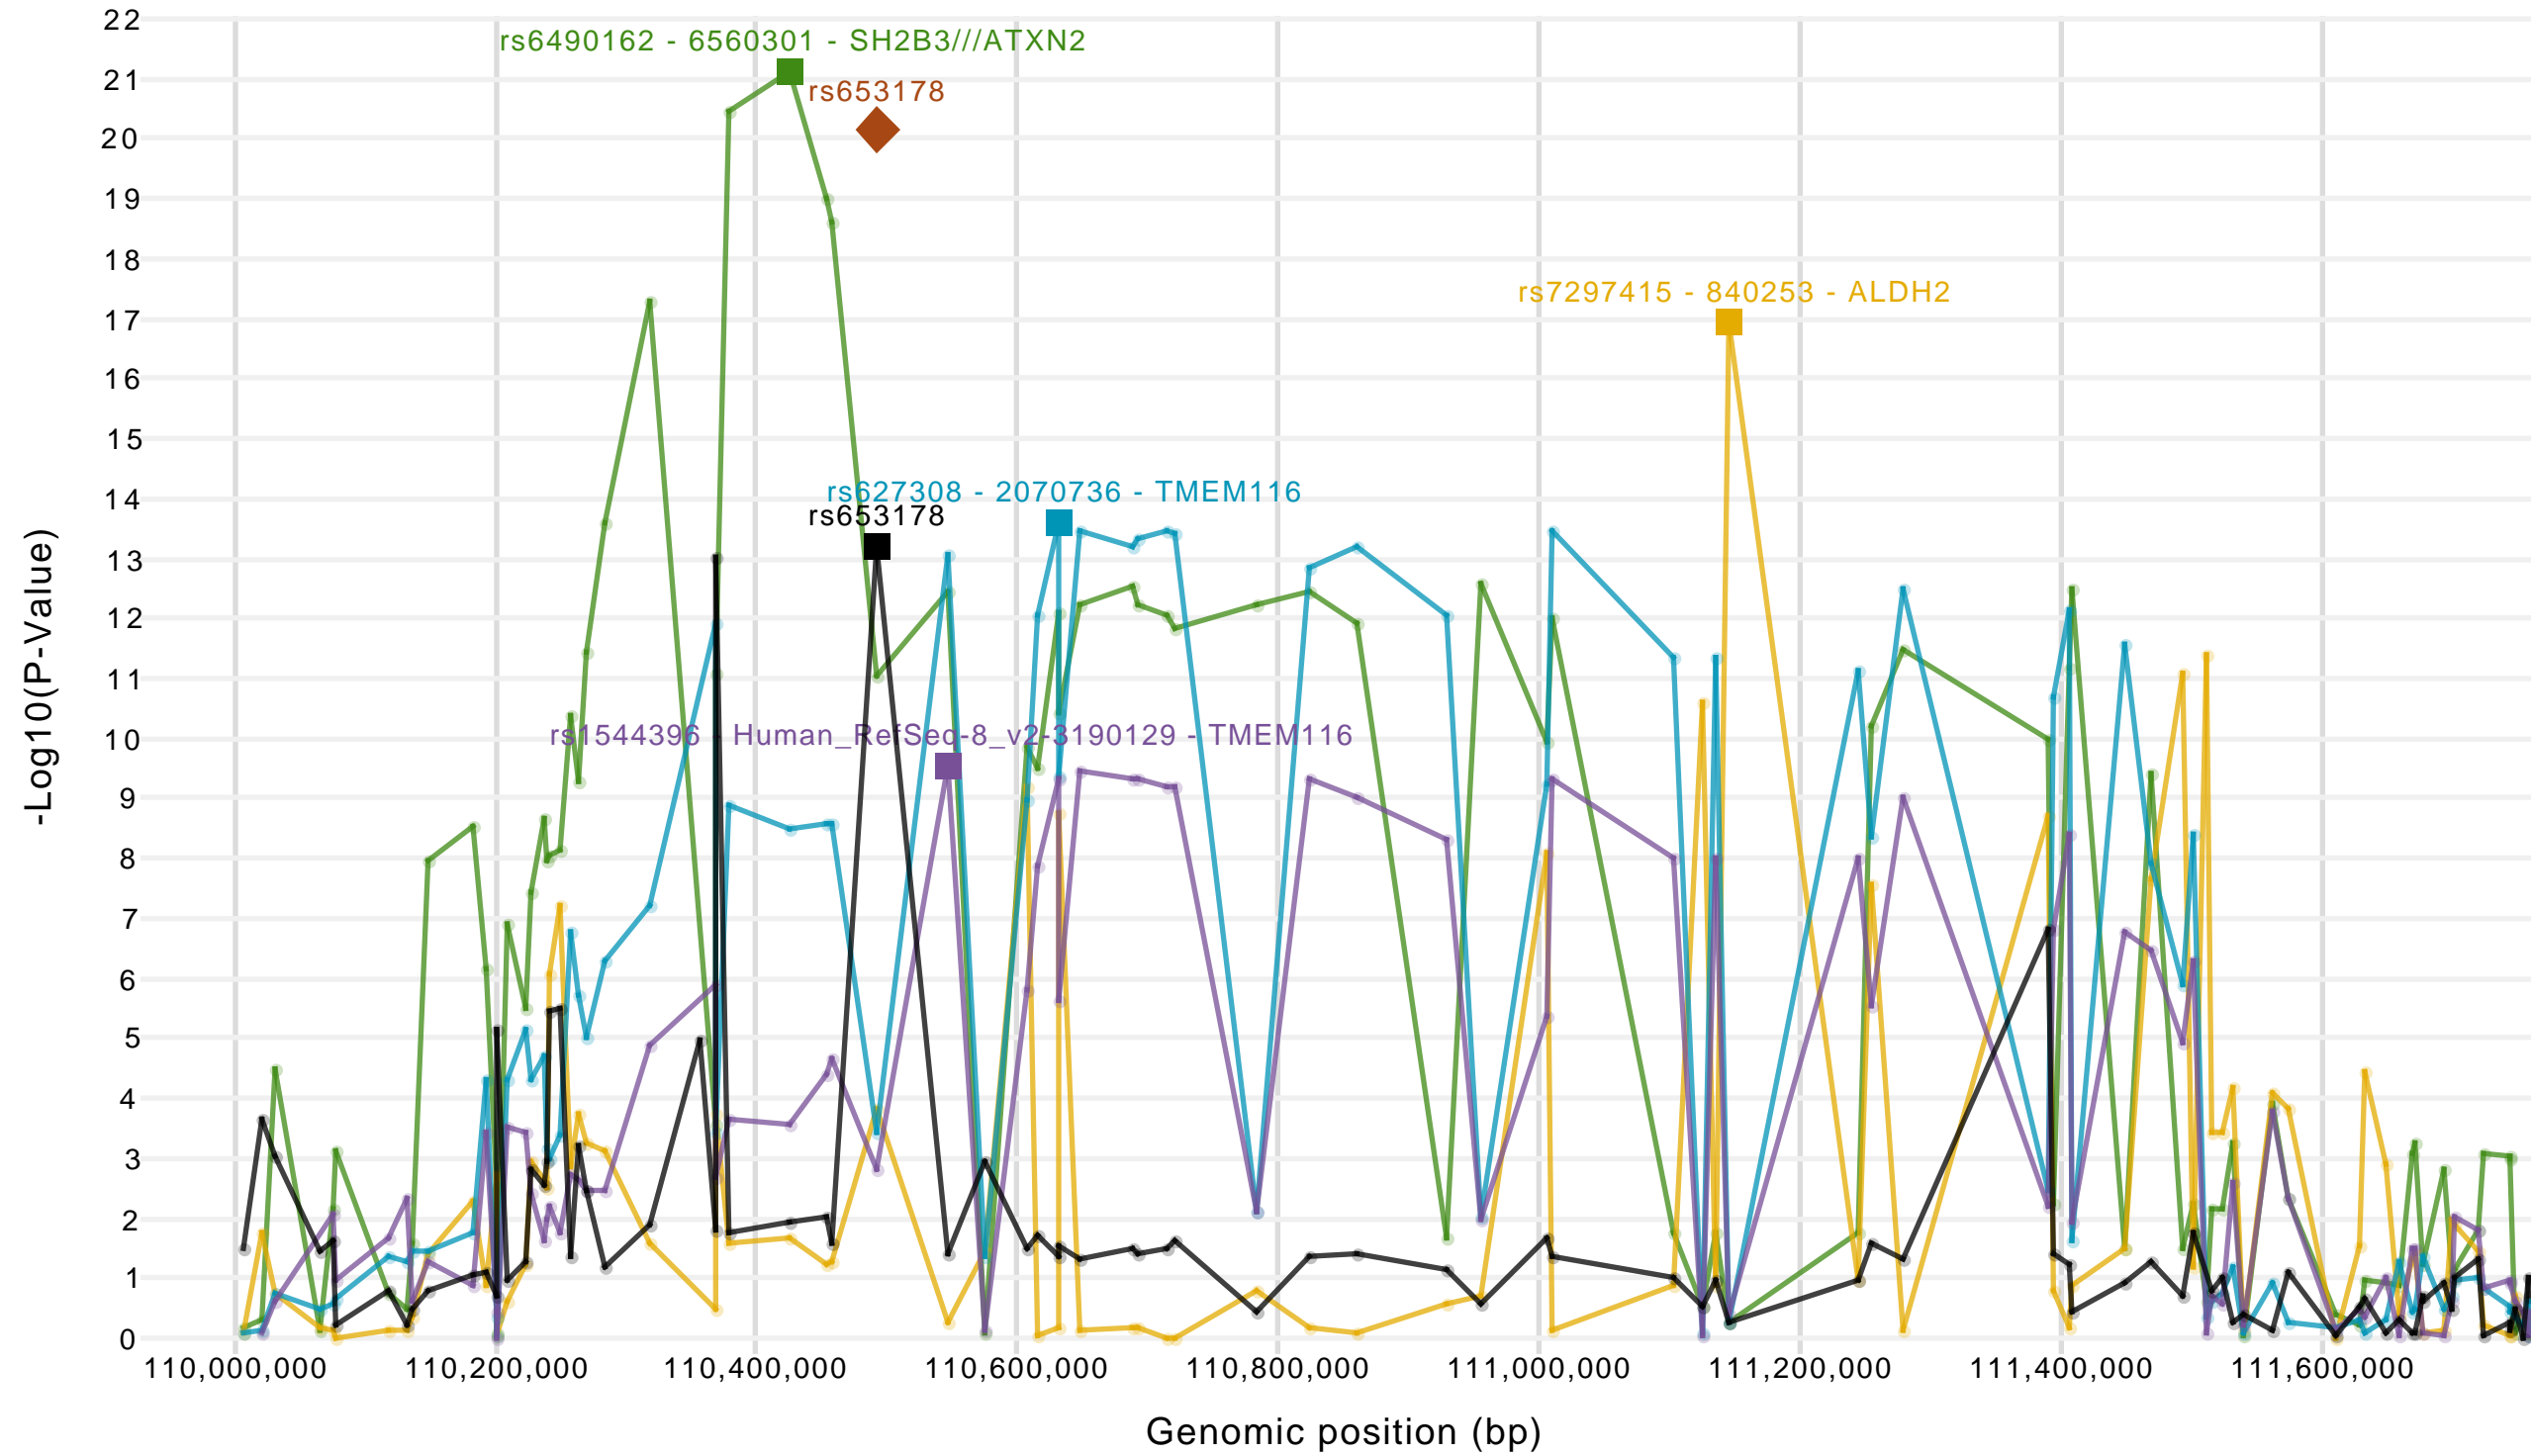

6560301 - SH2B3///ATXN2      840253 - ALDH2      2070736 - TMEM116  
Human\_RefSeq-8\_v2-3190129 - TMEM116

# Chromosome 16

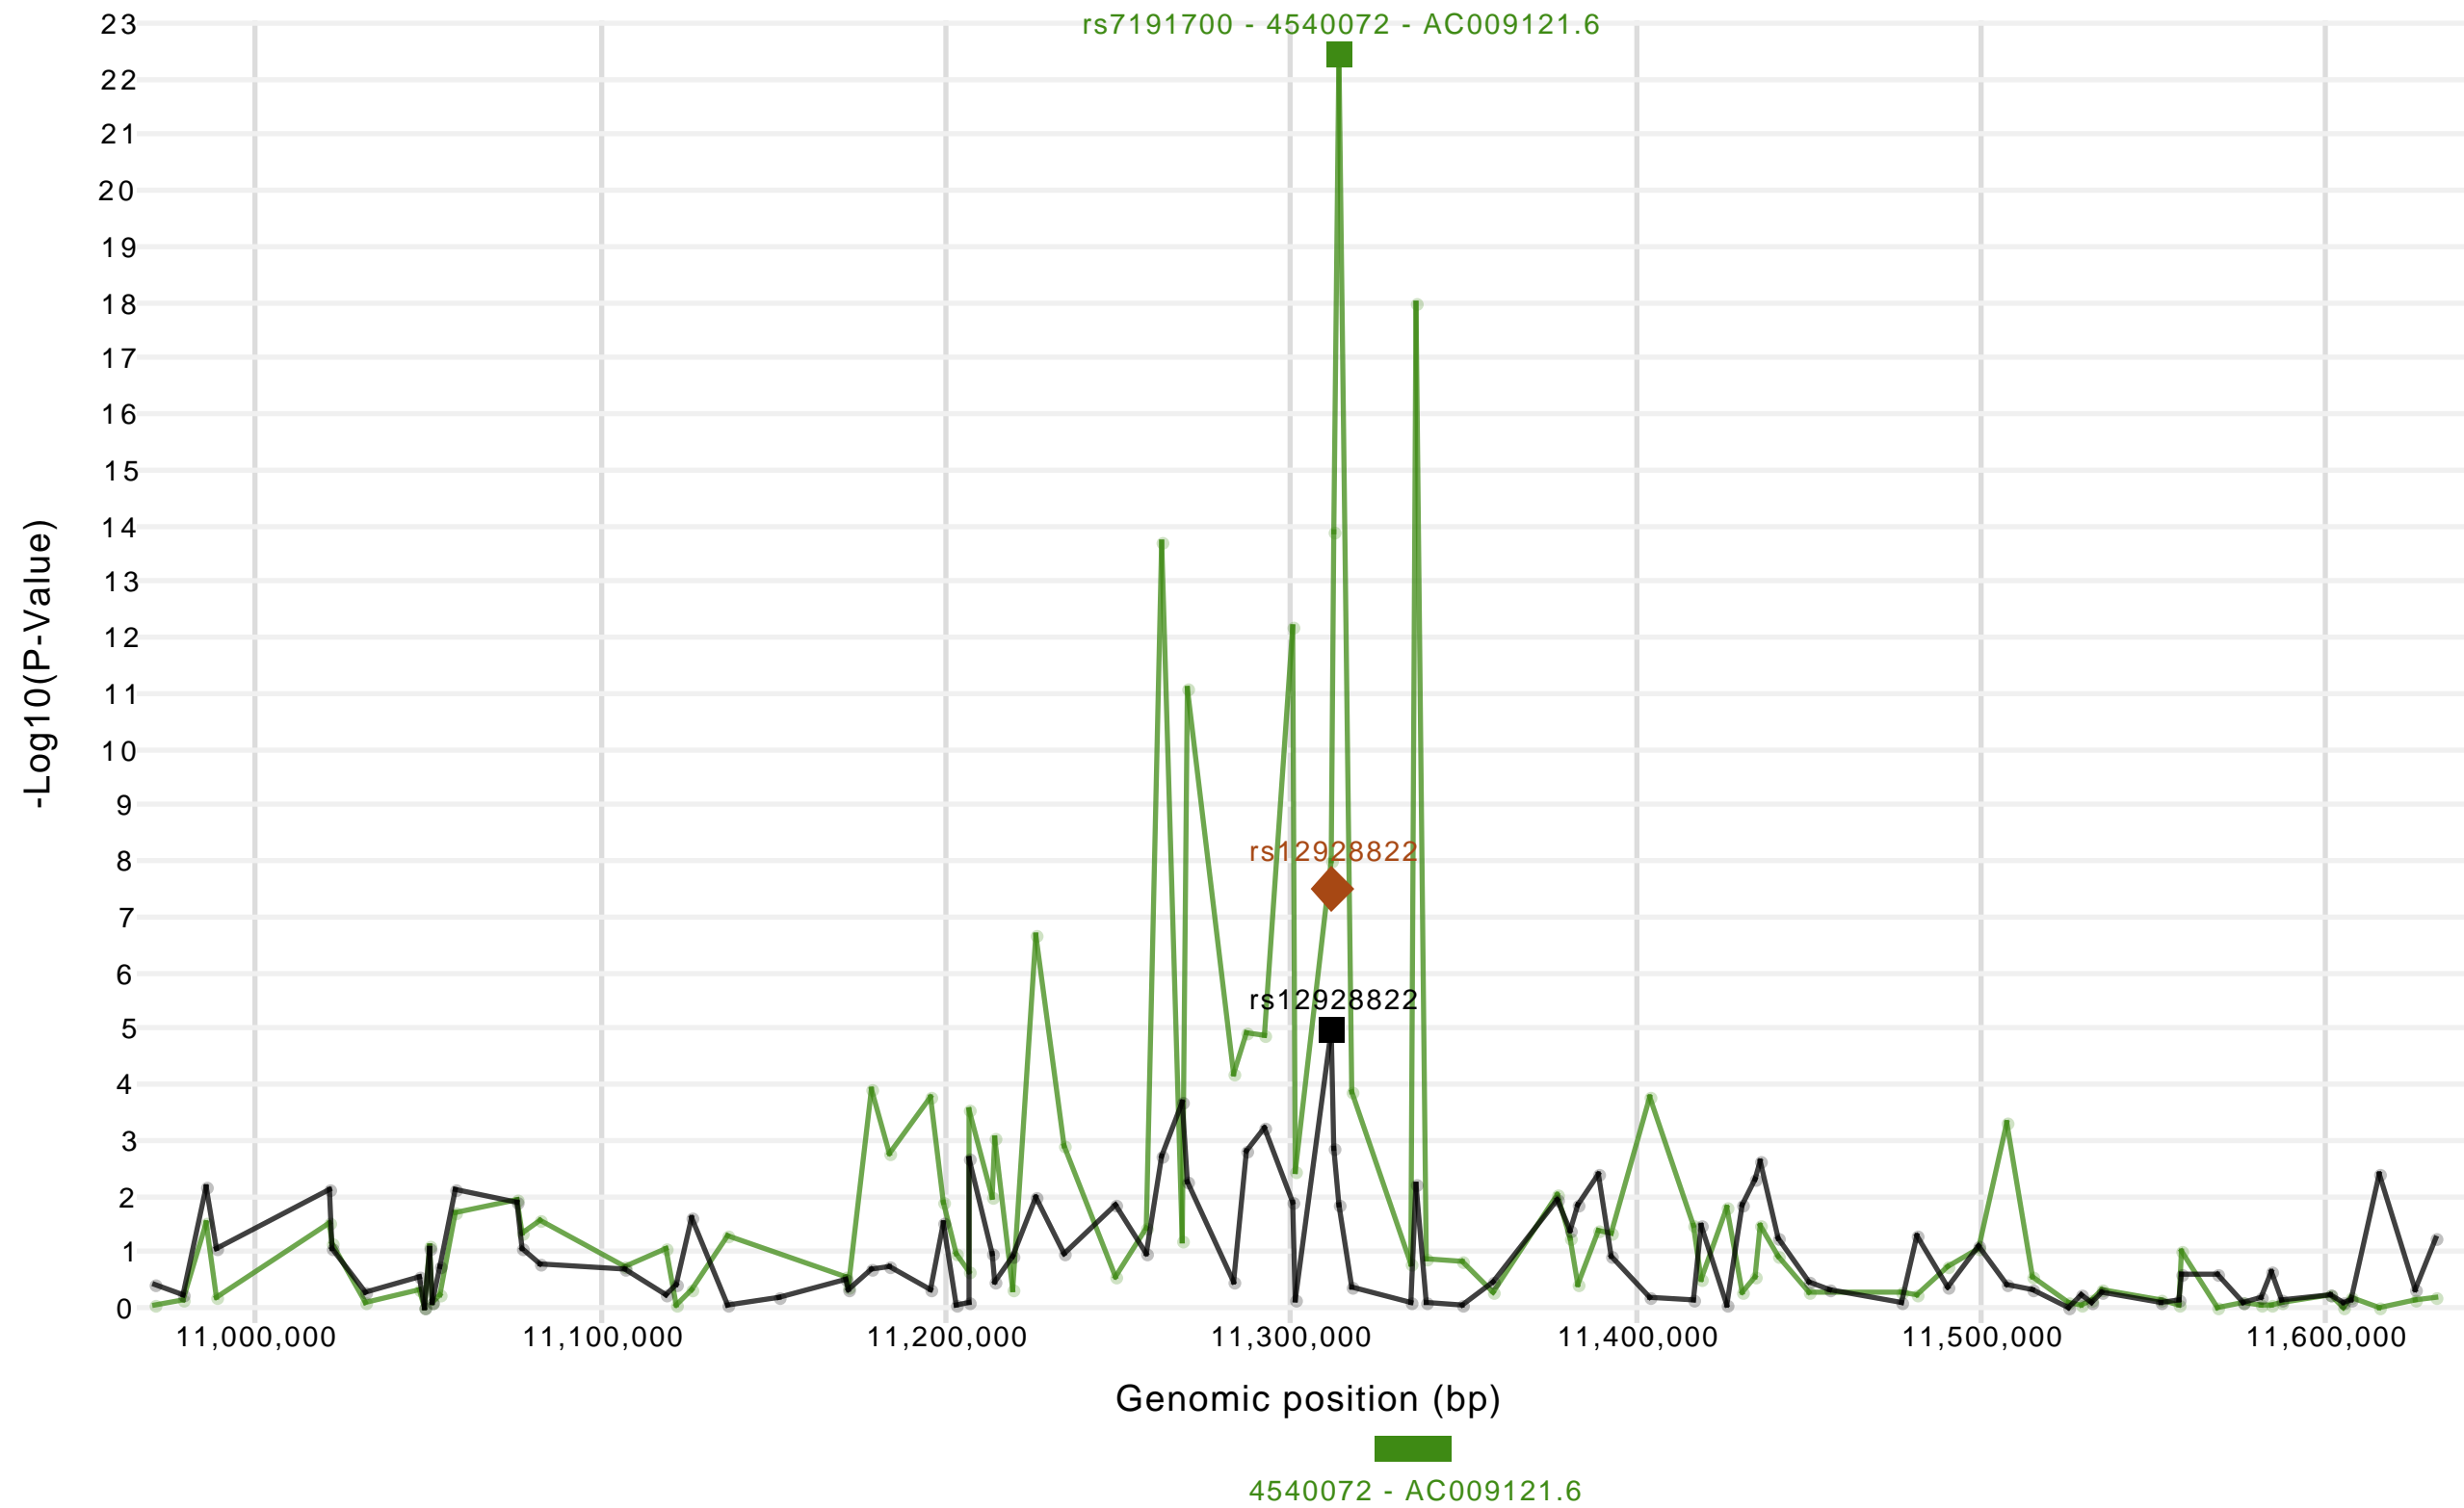

# Chromosome 17

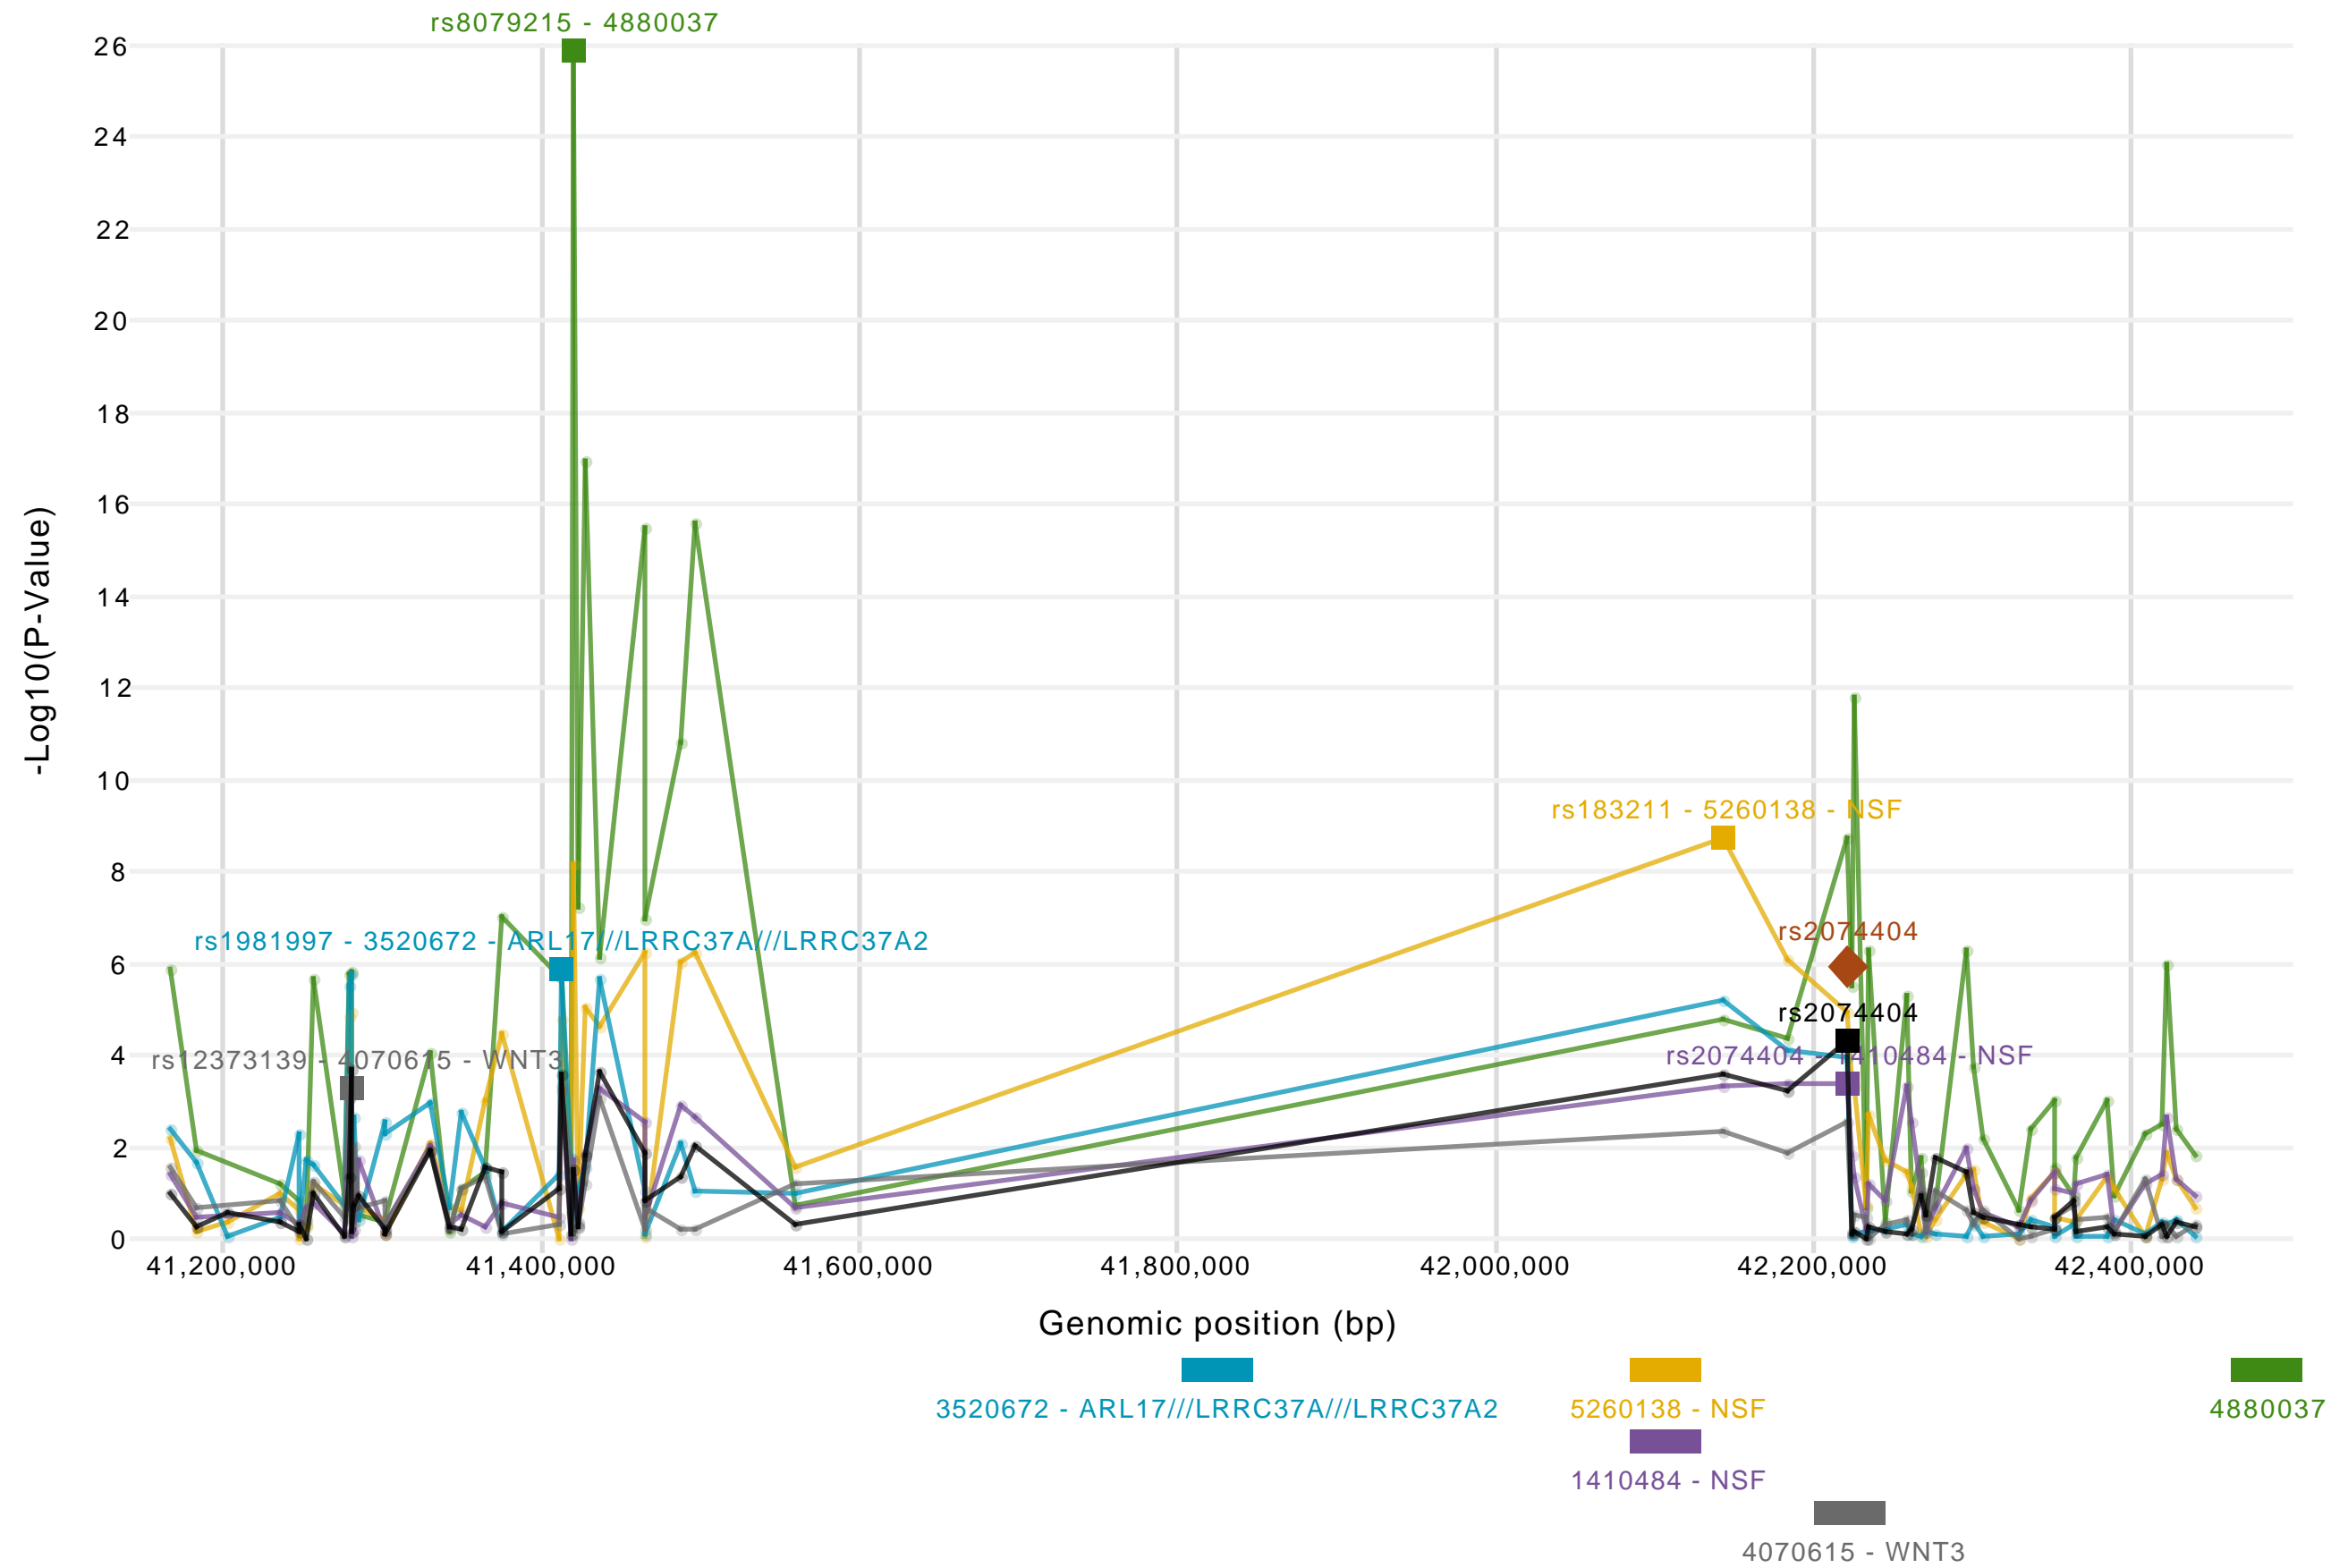

Chromosome 21

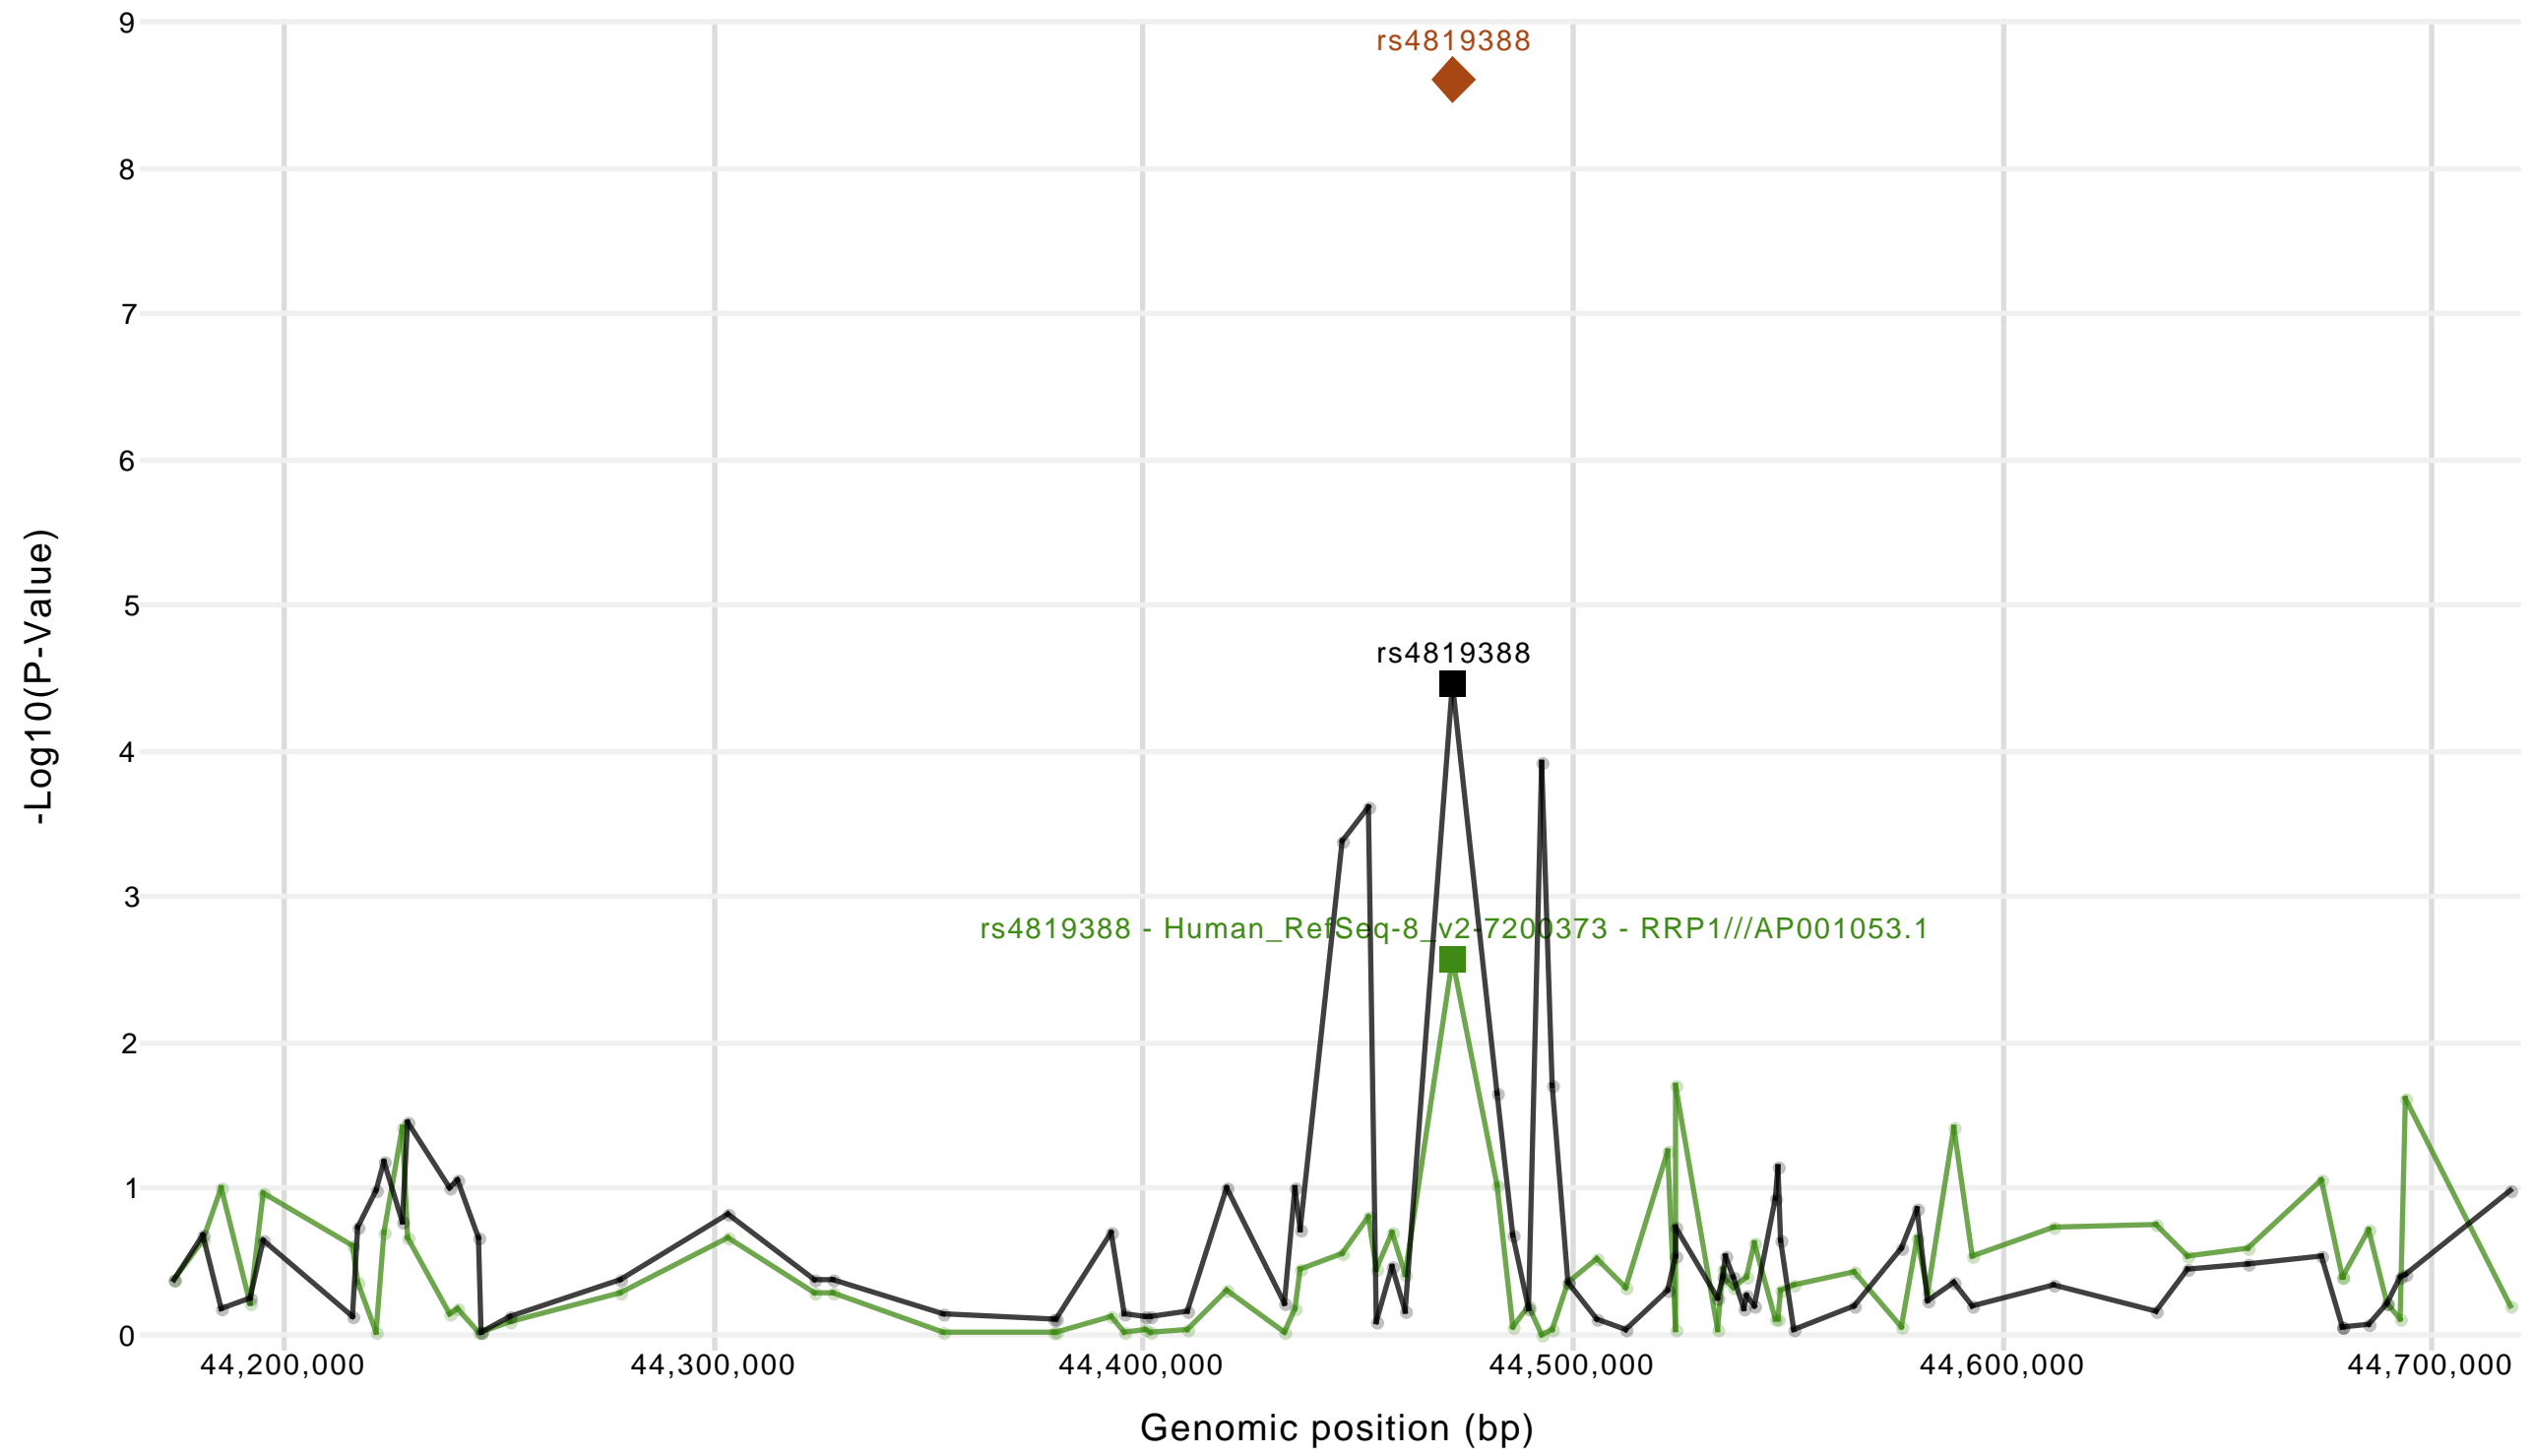

RRP1///AP001053.1



# Chromosome 22

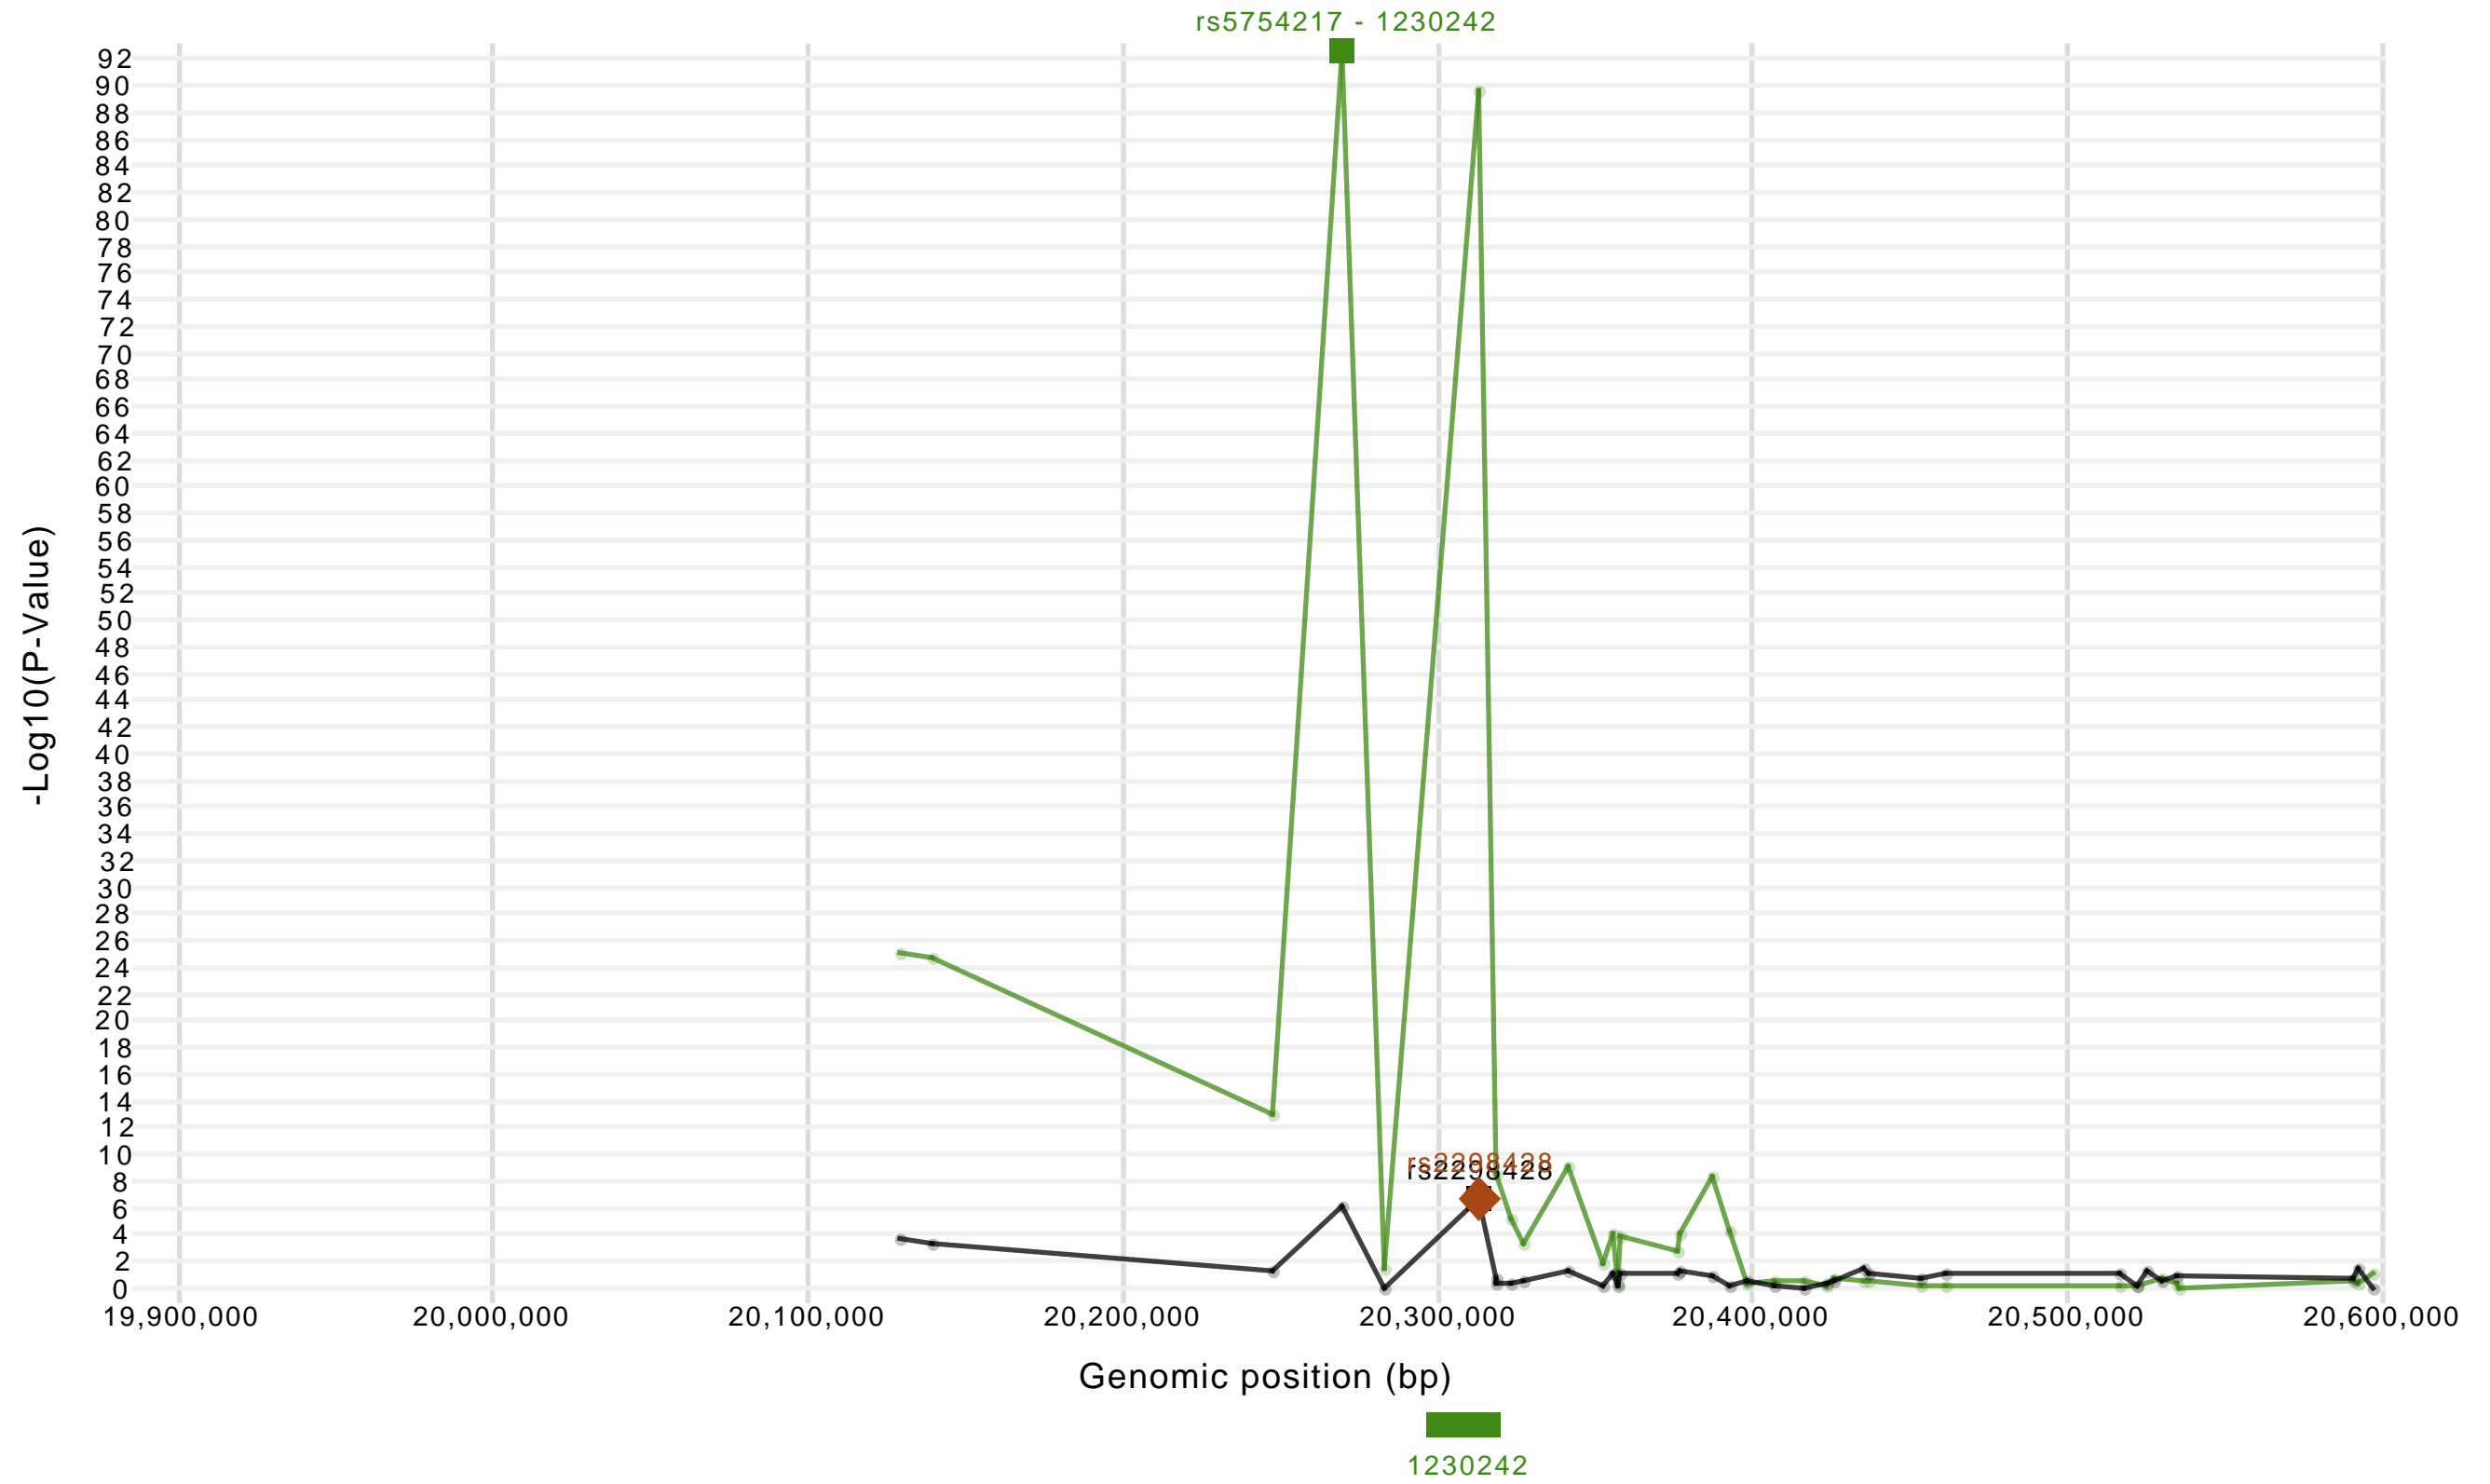

# Chromosome 23

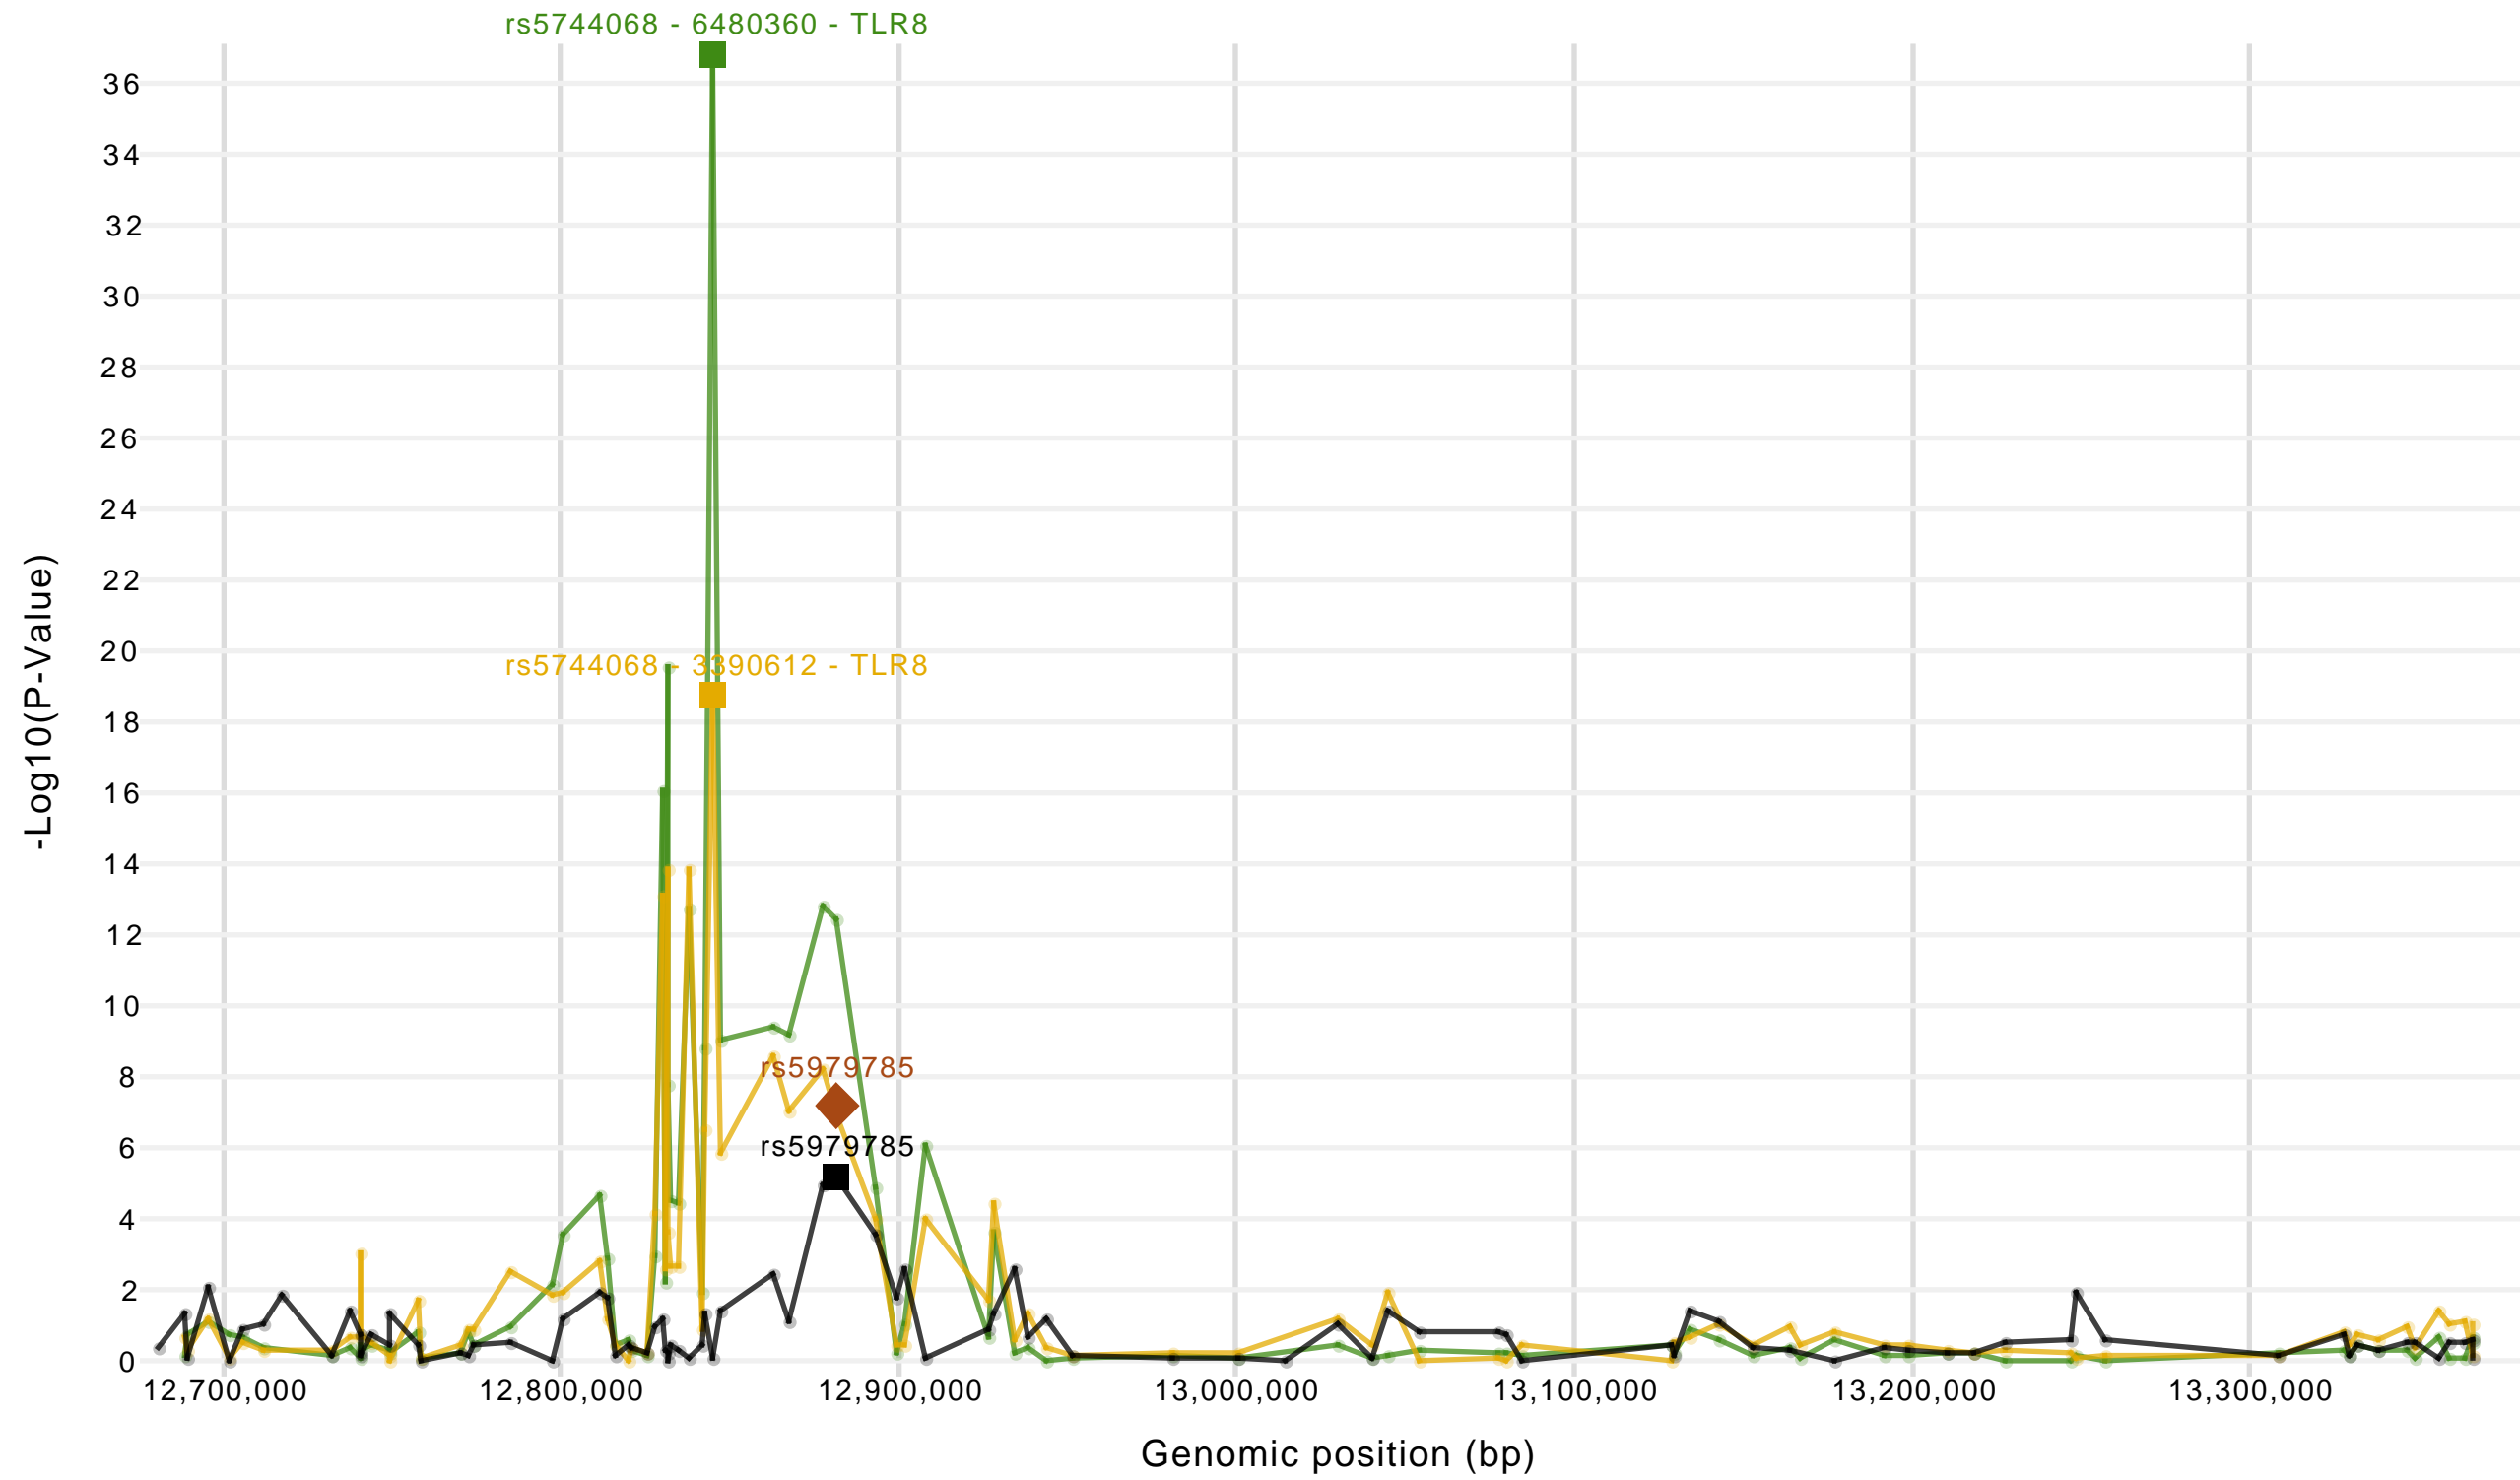

6480360 - TLR8  
3390612 - TLR8
